# Supplementary material for: Comparative characterization of human induced pluripotent stem cells (hiPSC) derived from patients with schizophrenia and autism
Source: PubMed Central journal article supplement (PMC6663940; doi:10.1038/s41398-019-0517-3), 2019-07-29
Supplement: 41398_2019_517_MOESM1_ESM.pdf [file 41398_2019_517_MOESM1_ESM.pdf]

## Supplemental table S2

Deregulated mRNAs of SZ2 compared to the group of healthy controls CTR1,2,3

| gene_id         | gene       | baseMean   | log2FoldChange | lfcSE      | stat        | pvalue     | padj       |
|-----------------|------------|------------|----------------|------------|-------------|------------|------------|
| ENSG00000224911 | AC015936.3 | 93,3650197 | 4,244931072    | 1,02796543 | 4,12944923  | 3,64E-05   | 0,02193113 |
| ENSG00000106819 | ASPN       | 513,043841 | 4,082341174    | 0,89776295 | 4,5472373   | 5,44E-06   | 0,0047206  |
| ENSG00000125730 | C3         | 82,4096708 | 4,261980204    | 0,97676661 | 4,36335577  | 1,28E-05   | 0,00924111 |
| ENSG00000151062 | CACNA2D4   | 117,577691 | 4,06073088     | 0,95272836 | 4,26221267  | 2,02E-05   | 0,0137337  |
| ENSG00000019582 | CD74       | 12301,8847 | 5,961863689    | 0,93810421 | 6,35522539  | 2,08E-10   | 1,51E-06   |
| ENSG00000164287 | CDC20B     | 58,5358669 | 6,000599287    | 1,05161692 | 5,70606954  | 1,16E-08   | 2,28E-05   |
| ENSG00000133048 | CHI3L1     | 1454,28641 | 5,816924043    | 0,94003366 | 6,18799552  | 6,09E-10   | 2,21E-06   |
| ENSG00000179583 | CIITA      | 1020,07467 | 5,734069226    | 0,94506317 | 6,06739254  | 1,30E-09   | 4,03E-06   |
| ENSG00000115844 | DLX2       | 313,509902 | 4,151684406    | 0,94187496 | 4,4078934   | 1,04E-05   | 0,00838687 |
| ENSG00000105880 | DLX5       | 179,753483 | 4,16799157     | 0,94723063 | 4,40018665  | 1,08E-05   | 0,00838687 |
| ENSG00000006377 | DLX6       | 92,6039572 | 3,969684947    | 1,00097226 | 3,96582912  | 7,31E-05   | 0,03781054 |
| ENSG00000231764 | DLX6-AS1   | 1586,87752 | 5,081953235    | 0,89436801 | 5,68217242  | 1,33E-08   | 2,41E-05   |
| ENSG00000070886 | EPHA8      | 730,399894 | -3,547127398   | 0,90424188 | -3,92276387 | 8,75E-05   | 0,04357617 |
| ENSG00000164308 | ERAP2      | 773,564532 | 5,364702086    | 0,95254646 | 5,63195846  | 1,78E-08   | 2,76E-05   |
| ENSG00000230316 | FEZF1-AS1  | 33,8374737 | 4,417157088    | 1,07555311 | 4,10687026  | 4,01E-05   | 0,02353442 |
| ENSG00000143631 | FLG        | 20,4858799 | 4,600177245    | 1,09632116 | 4,19601245  | 2,72E-05   | 0,01734759 |
| ENSG00000164694 | FNDC1      | 273,356825 | 3,738919511    | 0,92488903 | 4,04256011  | 5,29E-05   | 0,03020868 |
| ENSG00000134612 | FOLH1B     | 38,4802338 | 5,585841019    | 1,079649   | 5,1737565   | 2,29E-07   | 0,00026218 |
| ENSG00000176165 | FOXG1      | 573,952944 | 4,1386971      | 1,06714164 | 3,87830158  | 0,00010519 | 0,04821119 |
| ENSG00000117226 | GBP3       | 401,835411 | 4,20877983     | 0,95245789 | 4,41886183  | 9,92E-06   | 0,0082858  |
| ENSG00000131095 | GFAP       | 48438,2639 | 3,824662228    | 0,91714363 | 4,17018893  | 3,04E-05   | 0,01887996 |
| ENSG00000184674 | GSTT1      | 911,695506 | -4,780162341   | 0,91329899 | -5,2339512  | 1,66E-07   | 0,00020014 |
| ENSG00000206337 | HCP5       | 196,747512 | 4,324725105    | 0,98521118 | 4,38964272  | 1,14E-05   | 0,0085004  |
| ENSG00000204257 | HLA-DMA    | 996,195529 | 4,218151482    | 0,90468679 | 4,66255452  | 3,12E-06   | 0,00282535 |
| ENSG00000242574 | HLA-DMB    | 344,812711 | 4,530533268    | 0,9039972  | 5,01166735  | 5,40E-07   | 0,00058579 |

|                 |               |            |              |            |             |            |            |
|-----------------|---------------|------------|--------------|------------|-------------|------------|------------|
| ENSG00000204252 | HLA-DOA       | 1295,47277 | 6,301866064  | 0,9358914  | 6,73354413  | 1,66E-11   | 1,80E-07   |
| ENSG00000231389 | HLA-DPA1      | 5359,91757 | 5,606313178  | 0,89132758 | 6,28984596  | 3,18E-10   | 1,56E-06   |
| ENSG00000196735 | HLA-DQA1      | 1511,60291 | 5,535999062  | 0,95550708 | 5,79378129  | 6,88E-09   | 1,49E-05   |
| ENSG00000237541 | HLA-DQA2      | 711,906614 | 5,210365051  | 1,05054945 | 4,95965709  | 7,06E-07   | 0,00073012 |
| ENSG00000232629 | HLA-DQB2      | 111,351614 | 6,029798144  | 1,0297285  | 5,85571649  | 4,75E-09   | 1,15E-05   |
| ENSG00000204287 | HLA-DRA       | 9921,96611 | 5,539264499  | 0,88332431 | 6,27092952  | 3,59E-10   | 1,56E-06   |
| ENSG00000196126 | HLA-DRB1      | 3829,96493 | 4,032116215  | 0,99930897 | 4,03490444  | 5,46E-05   | 0,03041045 |
| ENSG00000198502 | HLA-DRB5      | 930,565252 | 4,343492646  | 0,99693237 | 4,35685788  | 1,32E-05   | 0,00924111 |
| ENSG00000229391 | HLA-DRB6      | 433,344135 | 5,611980405  | 1,00680603 | 5,57404328  | 2,49E-08   | 3,60E-05   |
| ENSG00000204642 | HLA-F         | 272,374174 | 3,832808587  | 0,98919149 | 3,87468819  | 0,00010676 | 0,04821119 |
| ENSG00000132204 | LINC00470     | 66,8182205 | 4,729563678  | 0,99768982 | 4,7405151   | 2,13E-06   | 0,00210385 |
| ENSG00000012223 | LTF           | 1676,89576 | 6,802811782  | 0,99154255 | 6,860837    | 6,85E-12   | 1,49E-07   |
| ENSG00000053438 | NNAT          | 70431,1266 | -4,702164387 | 0,88314132 | -5,32436234 | 1,01E-07   | 0,00012939 |
| ENSG00000111331 | OAS3          | 498,562369 | 4,199238433  | 0,89146025 | 4,71051675  | 2,47E-06   | 0,00233252 |
| ENSG00000160951 | PTGER1        | 76,5995958 | 3,872015565  | 0,98759388 | 3,92065567  | 8,83E-05   | 0,04357617 |
| ENSG00000198774 | RASSF9        | 195,626248 | 3,727843295  | 0,9259836  | 4,02582     | 5,68E-05   | 0,03081862 |
| ENSG00000250138 | RP11-848G14.5 | 16,8870091 | 4,276938548  | 1,09745574 | 3,8971399   | 9,73E-05   | 0,04696325 |
| ENSG00000177409 | SAMD9L        | 286,832784 | 3,737104797  | 0,96176277 | 3,88568252  | 0,00010204 | 0,0481642  |
| ENSG00000126778 | SIX1          | 153,508514 | 3,771923811  | 0,97463952 | 3,87007067  | 0,0001088  | 0,04821119 |
| ENSG00000226287 | TMEM191A      | 177,126874 | -3,729471994 | 0,93637446 | -3,9828852  | 6,81E-05   | 0,03605444 |
| ENSG00000150244 | TRIM48        | 80,0229445 | 6,217231518  | 1,03887943 | 5,9845554   | 2,17E-09   | 5,89E-06   |
| ENSG00000148704 | VAX1          | 98,0218703 | 5,703404869  | 1,01246166 | 5,63320579  | 1,77E-08   | 2,76E-05   |
| ENSG00000106018 | VIPR2         | 240,506187 | -4,161382975 | 0,98045961 | -4,24431861 | 2,19E-05   | 0,01442589 |
| ENSG00000197134 | ZNF257        | 45,9548116 | 5,842963312  | 1,07331332 | 5,44385615  | 5,21E-08   | 7,08E-05   |
