# Supplementary material for: Comparative characterization of human induced pluripotent stem cells (hiPSC) derived from patients with schizophrenia and autism
Source: PubMed Central journal article supplement (PMC6663940; doi:10.1038/s41398-019-0517-3), 2019-07-29
Supplement: 41398_2019_517_MOESM2_ESM.pdf [file 41398_2019_517_MOESM2_ESM.pdf]

Supplemental table S3

| Gene names           | Protein names                                                                | Average<br>(Healthy) | Average<br>(Autism) | Average (SZ) | Fold Difference       |                                   |                                  | P-value              |                          |                         | Q-value<br>Healthy vs<br>SZ | Q-value<br>Healthy vs<br>SZ | Q-value<br>Autism vs<br>SZ |
|----------------------|------------------------------------------------------------------------------|----------------------|---------------------|--------------|-----------------------|-----------------------------------|----------------------------------|----------------------|--------------------------|-------------------------|-----------------------------|-----------------------------|----------------------------|
|                      |                                                                              |                      |                     |              | (Autism -<br>Healthy) | Fold Difference<br>(SZ - Healthy) | Fold Difference<br>(SZ - Autism) | Healthy vs<br>Autism | P-value<br>Healthy vs SZ | P-value<br>Autism vs SZ |                             |                             |                            |
| VPS35                | Vacuolar protein sorting-associated protein 35                               | 5,03                 | 4,94                | 4,92         | 0,80                  | 0,78                              | 0,97                             | 0,1148               | 0,0001                   | 0,8055                  | 0,2283                      | 0,0234                      | 0,6124                     |
| CLTC                 | Clathrin heavy chain 1                                                       | 6,05                 | 5,88                | 5,87         | 0,67                  | 0,66                              | 0,99                             | 0,0816               | 0,0003                   | 0,9414                  | 0,2248                      | 0,0637                      | 0,6561                     |
| SGTA                 | Small glutamine-rich tetratricopeptide repeat-containing protein alpha       | 4,17                 | 4,41                | 4,28         | 1,71                  | 1,27                              | 0,74                             | 0,0742               | 0,3450                   | 0,0008                  | 0,2248                      | 0,4142                      | 0,1841                     |
| PTPLAD1              | Very-long-chain (3R)-3-hydroxyacyl-CoA dehydratase 3                         | 4,80                 | 4,71                | 4,49         | 0,80                  | 0,48                              | 0,60                             | 0,4065               | 0,0009                   | 0,1141                  | 0,3450                      | 0,1282                      | 0,3354                     |
| RAB11B;RAB11A        | Ras-related protein Rab-11B;Ras-related protein Rab-11A                      | 4,76                 | 4,94                | 4,63         | 1,50                  | 0,74                              | 0,49                             | 0,0057               | 0,0091                   | 0,0010                  | 0,2248                      | 0,1685                      | 0,1841                     |
| ACTB                 | Actin, cytoplasmic 1;Actin, cytoplasmic 1, N-terminally processed            | 6,28                 | 6,25                | 6,11         | 0,92                  | 0,67                              | 0,73                             | 0,6843               | 0,1038                   | 0,0017                  | 0,4151                      | 0,2759                      | 0,1841                     |
| RPL8                 | 60S ribosomal protein L8                                                     | 3,67                 | 3,76                | 3,96         | 1,23                  | 1,96                              | 1,60                             | 0,1421               | 0,0020                   | 0,0076                  | 0,2397                      | 0,1640                      | 0,1841                     |
| SMU1                 | WD40 repeat-containing protein SMU1;WD40 repeat-containing protein           | 4,22                 | 4,38                | 4,16         | 1,46                  | 0,86                              | 0,59                             | 0,0092               | 0,0175                   | 0,0022                  | 0,2248                      | 0,2036                      | 0,1841                     |
| TUBB                 | Tubulin beta chain                                                           | 6,21                 | 6,24                | 6,02         | 1,07                  | 0,64                              | 0,60                             | 0,6222               | 0,0381                   | 0,0024                  | 0,3979                      | 0,2066                      | 0,1841                     |
| MGEA5                | Bifunctional protein NCOAT;Protein O-GlcNAcase;Histone acetyltransferase     | 4,30                 | 4,49                | 4,29         | 1,57                  | 0,97                              | 0,62                             | 0,0623               | 0,8912                   | 0,0027                  | 0,2248                      | 0,5472                      | 0,1841                     |
| RPL19                | Ribosomal protein L19;60S ribosomal protein L19                              | 3,99                 | 4,15                | 4,29         | 1,44                  | 1,97                              | 1,36                             | 0,1538               | 0,0028                   | 0,1765                  | 0,2451                      | 0,1640                      | 0,3720                     |
| RAB7A                | Ras-related protein Rab-7a                                                   | 5,02                 | 5,24                | 5,06         | 1,65                  | 1,10                              | 0,67                             | 0,0028               | 0,4916                   | 0,0305                  | 0,2248                      | 0,4608                      | 0,2831                     |
| RPS7                 | 40S ribosomal protein S7                                                     | 4,64                 | 4,87                | 5,05         | 1,72                  | 2,58                              | 1,50                             | 0,2064               | 0,0031                   | 0,3319                  | 0,2750                      | 0,1640                      | 0,4345                     |
| DCX                  | Neuronal migration protein doublecortin                                      | 5,11                 | 5,22                | 4,64         | 1,29                  | 0,34                              | 0,27                             | 0,5344               | 0,0462                   | 0,0035                  | 0,3789                      | 0,2066                      | 0,1841                     |
| NCAM1                | Neural cell adhesion molecule 1                                              | 5,33                 | 5,17                | 4,71         | 0,69                  | 0,24                              | 0,35                             | 0,3498               | 0,0036                   | 0,0477                  | 0,3239                      | 0,1640                      | 0,2831                     |
| DCTN2                | Dynactin subunit 2                                                           | 4,75                 | 4,94                | 4,48         | 1,54                  | 0,54                              | 0,35                             | 0,2961               | 0,1811                   | 0,0038                  | 0,3116                      | 0,3071                      | 0,1841                     |
| H2AFY2               | Core histone macro-H2A.2;Histone H2A                                         | 5,33                 | 5,42                | 5,18         | 1,23                  | 0,72                              | 0,58                             | 0,3637               | 0,1665                   | 0,0043                  | 0,3285                      | 0,3027                      | 0,1841                     |
| COPB1                | Coatamer subunit beta                                                        | 4,67                 | 4,62                | 4,84         | 0,89                  | 1,47                              | 1,65                             | 0,3778               | 0,0044                   | 0,0101                  | 0,3328                      | 0,1640                      | 0,1841                     |
| HSPB1                | Heat shock protein beta-1                                                    | 4,84                 | 5,00                | 5,42         | 1,47                  | 3,79                              | 2,58                             | 0,3372               | 0,0047                   | 0,0748                  | 0,3221                      | 0,1640                      | 0,2918                     |
| PPT1                 | Palmitoyl-protein thioesterase 1                                             | 4,12                 | 4,14                | 4,19         | 1,05                  | 1,18                              | 1,12                             | 0,6732               | 0,0047                   | 0,3777                  | 0,4111                      | 0,1640                      | 0,4438                     |
| OPA1                 | Dynamin-like 120 kDa protein, mitochondrial;Dynamin-like 120 kDa protein     | 4,55                 | 4,50                | 4,18         | 0,90                  | 0,43                              | 0,47                             | 0,7534               | 0,0594                   | 0,0049                  | 0,4326                      | 0,2247                      | 0,1841                     |
| PHB                  | Prohibitin                                                                   | 5,23                 | 5,35                | 5,38         | 1,31                  | 1,40                              | 1,07                             | 0,0051               | 0,0648                   | 0,6325                  | 0,2248                      | 0,2293                      | 0,5402                     |
| PDIA3                | Protein disulfide-isomerase A3                                               | 5,69                 | 5,57                | 5,78         | 0,76                  | 1,22                              | 1,62                             | 0,0260               | 0,0128                   | 0,0051                  | 0,2248                      | 0,1983                      | 0,1841                     |
| VCL                  | Vinculin                                                                     | 4,95                 | 4,51                | 5,20         | 0,36                  | 1,75                              | 4,84                             | 0,0558               | 0,0054                   | 0,0142                  | 0,2248                      | 0,1640                      | 0,2177                     |
| PDIA6                | Protein disulfide-isomerase A6                                               | 5,47                 | 5,40                | 5,62         | 0,84                  | 1,41                              | 1,68                             | 0,1942               | 0,0349                   | 0,0054                  | 0,2681                      | 0,2036                      | 0,1841                     |
| EIF5A                | Eukaryotic translation initiation factor 5A-1                                | 4,31                 | 4,70                | 4,70         | 2,45                  | 2,45                              | 1,00                             | 0,0552               | 0,0056                   | 0,9963                  | 0,2248                      | 0,1640                      | 0,6648                     |
| RCN1                 | Reticulocalbin-1                                                             | 4,68                 | 4,44                | 4,83         | 0,58                  | 1,43                              | 2,46                             | 0,0474               | 0,1027                   | 0,0059                  | 0,2248                      | 0,2753                      | 0,1841                     |
| H3F3B;HIST2H3A;HIST3 | Histone H3;Histone H3.2;Histone H3.1t;Histone H3.3;Histone H3.1;Histone H3.3 | 4,23                 | 4,80                | 4,65         | 3,74                  | 2,67                              | 0,71                             | 0,0662               | 0,0061                   | 0,5661                  | 0,2248                      | 0,1640                      | 0,5074                     |
| RPL5                 | 60S ribosomal protein L5                                                     | 4,47                 | 4,40                | 4,59         | 0,85                  | 1,32                              | 1,55                             | 0,6184               | 0,4082                   | 0,0062                  | 0,3979                      | 0,4344                      | 0,1841                     |
| NIPSNAP3A            | Protein NipSnap homolog 3A                                                   | 4,12                 | 4,22                | 4,40         | 1,26                  | 1,88                              | 1,49                             | 0,5287               | 0,0066                   | 0,3071                  | 0,3778                      | 0,1640                      | 0,4247                     |
| RPS18                | 40S ribosomal protein S18                                                    | 4,33                 | 4,72                | 4,75         | 2,42                  | 2,61                              | 1,08                             | 0,0570               | 0,0067                   | 0,8432                  | 0,2248                      | 0,1640                      | 0,6237                     |
| 06. Sep              | Septin-6                                                                     | 4,21                 | 4,24                | 4,10         | 1,07                  | 0,77                              | 0,72                             | 0,3947               | 0,0369                   | 0,0068                  | 0,3397                      | 0,2036                      | 0,1841                     |
| SOD2                 | Superoxide dismutase [Mn], mitochondrial                                     | 3,97                 | 4,22                | 4,33         | 1,79                  | 2,31                              | 1,29                             | 0,0170               | 0,0068                   | 0,2309                  | 0,2248                      | 0,1640                      | 0,3949                     |
| HSD17B12             | Estradiol 17-beta-dehydrogenase 12                                           | 4,39                 | 4,56                | 4,67         | 1,46                  | 1,87                              | 1,28                             | 0,0211               | 0,0068                   | 0,0939                  | 0,2248                      | 0,1640                      | 0,3180                     |
| SNAP91               | Clathrin coat assembly protein AP180                                         | 4,49                 | 4,39                | 4,15         | 0,79                  | 0,45                              | 0,58                             | 0,5857               | 0,0070                   | 0,2335                  | 0,3926                      | 0,1640                      | 0,3949                     |
| SERPINH1             | Serpin H1                                                                    | 5,67                 | 5,33                | 6,05         | 0,46                  | 2,42                              | 5,23                             | 0,0248               | 0,0489                   | 0,0071                  | 0,2248                      | 0,2147                      | 0,1841                     |
| MACF1                | Microtubule-actin cross-linking factor 1, isoforms 1/2/3/5                   | 4,35                 | 4,06                | 4,25         | 0,51                  | 0,78                              | 1,55                             | 0,0071               | 0,8033                   | 0,6548                  | 0,2248                      | 0,5317                      | 0,5488                     |
| PPIB                 | Peptidyl-prolyl cis-trans isomerase B                                        | 5,13                 | 5,30                | 5,54         | 1,49                  | 2,60                              | 1,75                             | 0,0575               | 0,0074                   | 0,0336                  | 0,2248                      | 0,1640                      | 0,2831                     |
| SNF1                 | Staphylococcal nuclease domain-containing protein 1                          | 4,99                 | 4,79                | 5,04         | 0,64                  | 1,13                              | 1,76                             | 0,0182               | 0,1457                   | 0,0074                  | 0,2248                      | 0,2911                      | 0,1841                     |
| NADK2                | NAD kinase 2, mitochondrial                                                  | 3,87                 | 3,64                | 3,81         | 0,59                  | 0,87                              | 1,47                             | 0,0077               | 0,5282                   | 0,1386                  | 0,2248                      | 0,4701                      | 0,3520                     |
| PFN1                 | Profilin-1                                                                   | 4,91                 | 5,30                | 5,21         | 2,44                  | 2,01                              | 0,82                             | 0,0691               | 0,0079                   | 0,6403                  | 0,2248                      | 0,1670                      | 0,5450                     |
| FAM213A              | Redox-regulatory protein FAM213A                                             | 4,37                 | 4,57                | 4,55         | 1,58                  | 1,51                              | 0,95                             | 0,0082               | 0,2857                   | 0,8895                  | 0,2248                      | 0,3914                      | 0,6445                     |
| MOGS                 | Mannosyl-oligosaccharide glucosidase                                         | 4,10                 | 3,98                | 4,21         | 0,75                  | 1,31                              | 1,73                             | 0,0445               | 0,0398                   | 0,0082                  | 0,2248                      | 0,2066                      | 0,1841                     |
| PKM                  | Pyruvate kinase PKM;Pyruvate kinase                                          | 4,37                 | 4,49                | 4,14         | 1,31                  | 0,59                              | 0,45                             | 0,3142               | 0,0426                   | 0,0082                  | 0,3185                      | 0,2066                      | 0,1841                     |
| CALU                 | Calumenin                                                                    | 4,83                 | 4,38                | 4,92         | 0,36                  | 1,23                              | 3,45                             | 0,0084               | 0,5339                   | 0,0096                  | 0,2248                      | 0,4701                      | 0,1841                     |
| PPP2R2A              | Serine/threonine-protein phosphatase 2A 55 kDa regulatory subunit B alpha    | 4,28                 | 4,32                | 4,22         | 1,10                  | 0,88                              | 0,80                             | 0,7584               | 0,6912                   | 0,0088                  | 0,4335                      | 0,5201                      | 0,1841                     |
| NOLC1                | Nucleolar and coiled-body phosphoprotein 1                                   | 3,05                 | 3,21                | 3,33         | 1,44                  | 1,89                              | 1,31                             | 0,0090               | 0,0447                   | 0,2910                  | 0,2248                      | 0,2066                      | 0,4247                     |

|             |                                                                          |      |      |      |      |      |       |        |        |        |        |        |        |
|-------------|--------------------------------------------------------------------------|------|------|------|------|------|-------|--------|--------|--------|--------|--------|--------|
| ACO2        | Aconitate hydratase, mitochondrial                                       | 5,42 | 5,31 | 5,31 | 0,77 | 0,77 | 1,00  | 0,2397 | 0,0092 | 0,9830 | 0,2853 | 0,1685 | 0,6619 |
| PHB2        | Prohibitin-2                                                             | 5,23 | 5,28 | 5,38 | 1,12 | 1,40 | 1,26  | 0,0093 | 0,0620 | 0,1580 | 0,2248 | 0,2276 | 0,3626 |
| DYNC1H1     | Cytoplasmic dynein 1 heavy chain 1                                       | 6,08 | 5,97 | 5,91 | 0,77 | 0,68 | 0,88  | 0,1742 | 0,0093 | 0,4895 | 0,2560 | 0,1685 | 0,4752 |
| NSFL1C      | NSFL1 cofactor p47                                                       | 4,25 | 4,47 | 4,14 | 1,64 | 0,77 | 0,47  | 0,0095 | 0,5111 | 0,1037 | 0,2248 | 0,4676 | 0,3299 |
| KRT1        | Keratin, type II cytoskeletal 1                                          | 5,19 | 4,24 | 4,57 | 0,11 | 0,24 | 2,13  | 0,0514 | 0,1484 | 0,0095 | 0,2248 | 0,2924 | 0,1841 |
| PDE6H;MYL6  | Myosin light polypeptide 6                                               | 4,20 | 4,65 | 4,57 | 2,85 | 2,33 | 0,82  | 0,1428 | 0,0095 | 0,7464 | 0,2397 | 0,1685 | 0,5860 |
| PGAM1       | Phosphoglycerate mutase 1                                                | 4,88 | 5,36 | 5,15 | 2,98 | 1,85 | 0,62  | 0,0098 | 0,1640 | 0,2702 | 0,2248 | 0,3027 | 0,4160 |
| TLN1        | Talin-1                                                                  | 4,70 | 4,24 | 5,04 | 0,35 | 2,18 | 6,20  | 0,0790 | 0,0690 | 0,0099 | 0,2248 | 0,2321 | 0,1841 |
| P4HB        | Protein disulfide-isomerase                                              | 5,49 | 5,37 | 5,70 | 0,75 | 1,64 | 2,18  | 0,0716 | 0,0226 | 0,0099 | 0,2248 | 0,2036 | 0,1841 |
| TUBB4B      | Tubulin beta-4B chain                                                    | 6,02 | 6,06 | 5,80 | 1,08 | 0,61 | 0,56  | 0,5423 | 0,0278 | 0,0099 | 0,3801 | 0,2036 | 0,1841 |
| SEC13       | Protein SEC13 homolog                                                    | 3,62 | 3,72 | 3,90 | 1,27 | 1,89 | 1,49  | 0,3942 | 0,0603 | 0,0105 | 0,3397 | 0,2259 | 0,1848 |
| CALD1       | Caldesmon                                                                | 4,43 | 3,90 | 4,35 | 0,30 | 0,84 | 2,84  | 0,0776 | 0,7610 | 0,0111 | 0,2248 | 0,5288 | 0,1884 |
| RTN4        | Reticulon-4                                                              | 5,36 | 5,22 | 5,18 | 0,72 | 0,66 | 0,92  | 0,1466 | 0,0113 | 0,6584 | 0,2425 | 0,1907 | 0,5508 |
| LASP1       | LIM and SH3 domain protein 1                                             | 4,43 | 4,61 | 4,51 | 1,54 | 1,23 | 0,79  | 0,1090 | 0,3816 | 0,0117 | 0,2265 | 0,4226 | 0,1912 |
| PGK1        | Phosphoglycerate kinase 1                                                | 5,62 | 5,99 | 5,76 | 2,34 | 1,37 | 0,58  | 0,0121 | 0,3711 | 0,1589 | 0,2248 | 0,4203 | 0,3626 |
| YWHAZ       | 14-3-3 protein zeta/delta                                                | 5,59 | 5,84 | 5,62 | 1,77 | 1,05 | 0,59  | 0,0126 | 0,8797 | 0,1608 | 0,2248 | 0,5472 | 0,3626 |
| ATP2B4      | Plasma membrane calcium-transporting ATPase 4                            | 4,62 | 4,24 | 4,14 | 0,42 | 0,34 | 0,80  | 0,0289 | 0,0126 | 0,5350 | 0,2248 | 0,1983 | 0,4934 |
| ATP5H       | ATP synthase subunit d, mitochondrial                                    | 4,06 | 4,36 | 4,52 | 1,99 | 2,85 | 1,43  | 0,0572 | 0,0131 | 0,0297 | 0,2248 | 0,1983 | 0,2831 |
| HSPA6;HSPA7 | Heat shock 70 kDa protein 6;Putative heat shock 70 kDa protein 7         | 3,55 | 3,72 | 3,85 | 1,50 | 2,00 | 1,33  | 0,1907 | 0,0540 | 0,0142 | 0,2673 | 0,2147 | 0,2177 |
| AP3D1       | AP-3 complex subunit delta-1                                             | 4,34 | 4,28 | 4,20 | 0,87 | 0,73 | 0,84  | 0,2613 | 0,0143 | 0,2334 | 0,2951 | 0,2036 | 0,3949 |
| HSP90B1     | Endoplasmic                                                              | 5,89 | 5,75 | 6,02 | 0,72 | 1,36 | 1,88  | 0,1018 | 0,0640 | 0,0156 | 0,2253 | 0,2293 | 0,2281 |
| PGRMC1      | Membrane-associated progesterone receptor component 1                    | 4,61 | 4,77 | 4,60 | 1,43 | 0,98 | 0,68  | 0,1043 | 0,9020 | 0,0158 | 0,2253 | 0,5472 | 0,2281 |
| RPL7        | 60S ribosomal protein L7                                                 | 4,64 | 4,72 | 4,89 | 1,18 | 1,77 | 1,49  | 0,3097 | 0,0159 | 0,0502 | 0,3185 | 0,2036 | 0,2831 |
| ATP5F1      | ATP synthase F(0) complex subunit B1, mitochondrial                      | 4,43 | 4,51 | 4,50 | 1,22 | 1,19 | 0,98  | 0,0160 | 0,4572 | 0,9232 | 0,2248 | 0,4491 | 0,6542 |
| CTNNB1      | Catenin beta-1                                                           | 4,91 | 4,70 | 4,63 | 0,61 | 0,53 | 0,86  | 0,3113 | 0,0164 | 0,7452 | 0,3185 | 0,2036 | 0,5860 |
| FBL         | rRNA 2-O-methyltransferase fibrillar                                     | 4,46 | 4,52 | 4,71 | 1,16 | 1,77 | 1,53  | 0,4193 | 0,0166 | 0,0235 | 0,3481 | 0,2036 | 0,2622 |
| C21orf33    | ES1 protein homolog, mitochondrial                                       | 3,76 | 3,96 | 3,96 | 1,60 | 1,58 | 0,99  | 0,0167 | 0,2074 | 0,9711 | 0,2248 | 0,3352 | 0,6605 |
| PPP2R1A     | Serine/threonine-protein phosphatase 2A 65 kDa regulatory subunit A a    | 5,50 | 5,51 | 5,34 | 1,03 | 0,70 | 0,68  | 0,8114 | 0,0300 | 0,0178 | 0,4477 | 0,2036 | 0,2474 |
| HK1         | Hexokinase-1                                                             | 5,31 | 5,05 | 4,81 | 0,55 | 0,32 | 0,58  | 0,1296 | 0,0179 | 0,1462 | 0,2363 | 0,2036 | 0,3554 |
| RAB1A       | Ras-related protein Rab-1A                                               | 4,84 | 5,09 | 5,02 | 1,79 | 1,50 | 0,84  | 0,0218 | 0,0179 | 0,2951 | 0,2248 | 0,2036 | 0,4247 |
| RPL15       | Ribosomal protein L15;60S ribosomal protein L15                          | 4,14 | 4,27 | 4,47 | 1,35 | 2,14 | 1,59  | 0,1348 | 0,0179 | 0,1120 | 0,2397 | 0,2036 | 0,3354 |
| ATP5O       | ATP synthase subunit O, mitochondrial                                    | 4,65 | 4,86 | 4,87 | 1,62 | 1,65 | 1,02  | 0,0180 | 0,1529 | 0,9519 | 0,2248 | 0,2943 | 0,6568 |
| LMNA        | Prelamin-A/C;Lamin-A/C                                                   | 5,01 | 4,39 | 5,64 | 0,24 | 4,24 | 17,81 | 0,1804 | 0,0523 | 0,0181 | 0,2587 | 0,2147 | 0,2474 |
| YWHAH       | 14-3-3 protein gamma;14-3-3 protein gamma, N-terminally processed        | 5,04 | 5,30 | 4,92 | 1,82 | 0,76 | 0,42  | 0,0182 | 0,5174 | 0,0750 | 0,2248 | 0,4680 | 0,2918 |
| PSMD8       | 26S proteasome non-ATPase regulatory subunit 8                           | 4,22 | 4,44 | 4,39 | 1,66 | 1,50 | 0,91  | 0,0183 | 0,0343 | 0,3177 | 0,2248 | 0,2036 | 0,4294 |
| RPL24       | 60S ribosomal protein L24                                                | 4,39 | 4,69 | 4,77 | 1,96 | 2,40 | 1,22  | 0,2205 | 0,0188 | 0,6602 | 0,2791 | 0,2036 | 0,5515 |
| RPS13       | 40S ribosomal protein S13                                                | 4,56 | 4,83 | 4,83 | 1,89 | 1,87 | 0,99  | 0,1135 | 0,0188 | 0,9813 | 0,2283 | 0,2036 | 0,6619 |
| PDIA3       |                                                                          | 4,62 | 4,40 | 4,65 | 0,61 | 1,08 | 1,75  | 0,0979 | 0,7075 | 0,0195 | 0,2248 | 0,5201 | 0,2566 |
| MLEC        | Malectin                                                                 | 4,07 | 4,01 | 4,23 | 0,87 | 1,45 | 1,68  | 0,4238 | 0,0328 | 0,0199 | 0,3492 | 0,2036 | 0,2566 |
| YBX1        | Nuclease-sensitive element-binding protein 1                             | 4,81 | 4,52 | 4,38 | 0,52 | 0,37 | 0,72  | 0,0202 | 0,0363 | 0,3553 | 0,2248 | 0,2036 | 0,4375 |
| PRDX4       | Peroxisome oxidoreductin-4                                               | 4,41 | 4,63 | 4,81 | 1,67 | 2,51 | 1,50  | 0,0980 | 0,0202 | 0,1349 | 0,2248 | 0,2036 | 0,3500 |
| RAN         | GTP-binding nuclear protein Ran                                          | 5,09 | 5,30 | 5,27 | 1,62 | 1,51 | 0,93  | 0,0446 | 0,0216 | 0,6856 | 0,2248 | 0,2036 | 0,5659 |
| ARF1;ARF3   | ADP-ribosylation factor 1;ADP-ribosylation factor 3                      | 5,06 | 5,34 | 5,28 | 1,91 | 1,64 | 0,86  | 0,0216 | 0,1277 | 0,5865 | 0,2248 | 0,2810 | 0,5181 |
| MATR3       | Matrin-3                                                                 | 5,62 | 5,59 | 5,52 | 0,94 | 0,79 | 0,84  | 0,7327 | 0,2376 | 0,0222 | 0,4291 | 0,3633 | 0,2622 |
| TUBB4A      | Tubulin beta-4A chain                                                    | 5,32 | 5,24 | 4,90 | 0,84 | 0,38 | 0,45  | 0,6271 | 0,0223 | 0,0468 | 0,3982 | 0,2036 | 0,2831 |
| SF3B3       | Splicing factor 3B subunit 3                                             | 4,54 | 4,56 | 4,67 | 1,05 | 1,34 | 1,28  | 0,9234 | 0,5424 | 0,0224 | 0,4771 | 0,4701 | 0,2622 |
| TMED9       | Transmembrane emp24 domain-containing protein 9                          | 4,14 | 4,24 | 4,37 | 1,26 | 1,72 | 1,37  | 0,0697 | 0,0226 | 0,0686 | 0,2248 | 0,2036 | 0,2918 |
| RAB6B       | Ras-related protein Rab-6B                                               | 4,86 | 5,05 | 4,86 | 1,53 | 0,99 | 0,64  | 0,0230 | 0,8972 | 0,0302 | 0,2248 | 0,5472 | 0,2831 |
| HSDL1       | Inactive hydroxysteroid dehydrogenase-like protein 1                     | 4,33 | 4,18 | 3,66 | 0,71 | 0,21 | 0,30  | 0,5584 | 0,0230 | 0,0407 | 0,3838 | 0,2036 | 0,2831 |
| SNRPD3      | Small nuclear ribonucleoprotein Sm D3                                    | 4,07 | 4,53 | 4,34 | 2,91 | 1,87 | 0,64  | 0,0628 | 0,0233 | 0,3360 | 0,2248 | 0,2036 | 0,4350 |
| HADHB       | Trifunctional enzyme subunit beta, mitochondrial;3-ketoacyl-CoA thiolase | 4,62 | 4,56 | 4,77 | 0,87 | 1,42 | 1,63  | 0,3524 | 0,1421 | 0,0236 | 0,3239 | 0,2908 | 0,2622 |
| MAPRE1      | Microtubule-associated protein RP/EB family member 1                     | 4,69 | 4,70 | 4,41 | 1,02 | 0,52 | 0,51  | 0,9431 | 0,1390 | 0,0238 | 0,4825 | 0,2881 | 0,2622 |
| RPS4X       | 40S ribosomal protein S4, X isoform                                      | 4,73 | 4,76 | 4,90 | 1,08 | 1,48 | 1,37  | 0,5790 | 0,0331 | 0,0238 | 0,3926 | 0,2036 | 0,2622 |
| LSS         | Lanosterol synthase                                                      | 4,58 | 4,31 | 4,31 | 0,53 | 0,53 | 1,01  | 0,1070 | 0,0239 | 0,9857 | 0,2262 | 0,2036 | 0,6619 |
| FARSB       | Phenylalanine-tRNA ligase beta subunit                                   | 4,37 | 4,45 | 4,35 | 1,22 | 0,97 | 0,80  | 0,2421 | 0,8479 | 0,0240 | 0,2853 | 0,5393 | 0,2622 |
| RPL3        | 60S ribosomal protein L3                                                 | 4,79 | 4,72 | 4,89 | 0,84 | 1,26 | 1,50  | 0,4992 | 0,4178 | 0,0246 | 0,3696 | 0,4365 | 0,2629 |

|                     |                                                                                                                   |      |      |      |      |      |      |         |        |        |        |        |        |
|---------------------|-------------------------------------------------------------------------------------------------------------------|------|------|------|------|------|------|---------|--------|--------|--------|--------|--------|
| ACTN4               | Alpha-actinin-4                                                                                                   | 5,51 | 5,29 | 5,52 | 0,60 | 1,01 | 1,70 | 0,0733  | 0,9440 | 0,0258 | 0,2248 | 0,5592 | 0,2691 |
| RPL26;KRBA2;RPL26L1 | 60S ribosomal protein L26-like 1;60S ribosomal protein L26                                                        | 3,90 | 3,99 | 4,14 | 1,21 | 1,74 | 1,44 | 0,4697  | 0,0261 | 0,1262 | 0,3631 | 0,2036 | 0,3411 |
| SRRT                | Serrate RNA effector molecule homolog                                                                             | 3,77 | 3,46 | 3,48 | 0,49 | 0,51 | 1,04 | 0,0280  | 0,0266 | 0,7062 | 0,2248 | 0,2036 | 0,5714 |
| DDX17               | Probable ATP-dependent RNA helicase DDX17                                                                         | 5,51 | 5,51 | 5,45 | 0,98 | 0,86 | 0,88 | 0,9193  | 0,4330 | 0,0272 | 0,4757 | 0,4405 | 0,2762 |
| CAPNS1              | Calpain small subunit 1                                                                                           | 4,16 | 4,36 | 4,54 | 1,58 | 2,38 | 1,51 | 0,0896  | 0,0273 | 0,2202 | 0,2248 | 0,2036 | 0,3949 |
| RAB10               | Ras-related protein Rab-10                                                                                        | 4,49 | 4,60 | 4,59 | 1,29 | 1,25 | 0,96 | 0,0300  | 0,0273 | 0,7235 | 0,2248 | 0,2036 | 0,5787 |
| RPL17               | 60S ribosomal protein L17                                                                                         | 4,52 | 4,63 | 4,73 | 1,27 | 1,60 | 1,26 | 0,3514  | 0,0273 | 0,3634 | 0,3239 | 0,2036 | 0,4375 |
| VPS4B               | Vacuolar protein sorting-associated protein 4B                                                                    | 3,86 | 3,82 | 3,99 | 0,90 | 1,34 | 1,48 | 0,5995  | 0,0275 | 0,0811 | 0,3926 | 0,2036 | 0,2929 |
| HDLBP               | Vigilin                                                                                                           | 4,31 | 4,09 | 4,52 | 0,59 | 1,61 | 2,72 | 0,0904  | 0,1712 | 0,0276 | 0,2248 | 0,3057 | 0,2762 |
| GSTP1               | Glutathione S-transferase P                                                                                       | 5,28 | 5,65 | 5,59 | 2,36 | 2,07 | 0,88 | 0,0420  | 0,0278 | 0,6709 | 0,2248 | 0,2036 | 0,5566 |
| RPL10;RPL10L        | 60S ribosomal protein L10;60S ribosomal protein L10-like                                                          | 4,25 | 4,47 | 4,63 | 1,68 | 2,40 | 1,43 | 0,0544  | 0,0280 | 0,2611 | 0,2248 | 0,2036 | 0,4124 |
| GNB2L1              | Guanine nucleotide-binding protein subunit beta-2-like 1;Guanine nucleotide-binding protein subunit beta-2-like 1 | 4,92 | 4,97 | 5,14 | 1,12 | 1,65 | 1,48 | 0,95196 | 0,0287 | 0,0994 | 0,3756 | 0,2036 | 0,3265 |
| CTNND1              | Catenin delta-1                                                                                                   | 4,42 | 4,41 | 4,32 | 0,97 | 0,80 | 0,83 | 0,7362  | 0,0294 | 0,0751 | 0,4291 | 0,2036 | 0,2918 |
| ATP5J2-PTCD1;ATP5J2 | ATP synthase subunit f, mitochondrial                                                                             | 4,01 | 4,20 | 4,11 | 1,55 | 1,25 | 0,80 | 0,0302  | 0,4601 | 0,4474 | 0,2248 | 0,4491 | 0,4665 |
| SARS                | Serine--tRNA ligase, cytoplasmic                                                                                  | 4,75 | 4,88 | 4,81 | 1,35 | 1,14 | 0,84 | 0,0306  | 0,1797 | 0,2113 | 0,2248 | 0,3070 | 0,3949 |
| 11. Sep             | Septin-11                                                                                                         | 4,98 | 4,98 | 4,86 | 1,00 | 0,76 | 0,76 | 0,9518  | 0,0307 | 0,0466 | 0,4843 | 0,2036 | 0,2831 |
| RPN2                | Dolichyl-diphosphooligosaccharide--protein glycosyltransferase subunit 2                                          | 5,10 | 4,87 | 5,02 | 0,59 | 0,83 | 1,40 | 0,0308  | 0,5478 | 0,3257 | 0,2248 | 0,4701 | 0,4335 |
| HSPD1               | 60 kDa heat shock protein, mitochondrial                                                                          | 6,01 | 5,89 | 5,99 | 0,76 | 0,96 | 1,25 | 0,0312  | 0,6761 | 0,0858 | 0,2248 | 0,5151 | 0,3018 |
| RPL21               | 60S ribosomal protein L21                                                                                         | 4,39 | 4,51 | 4,69 | 1,33 | 2,00 | 1,50 | 0,3031  | 0,0313 | 0,0783 | 0,3158 | 0,2036 | 0,2918 |
| RPL4                | 60S ribosomal protein L4                                                                                          | 5,05 | 5,07 | 5,24 | 1,06 | 1,54 | 1,45 | 0,8793  | 0,2953 | 0,0313 | 0,4682 | 0,3972 | 0,2831 |
| GPI                 | Glucose-6-phosphate isomerase                                                                                     | 5,29 | 5,58 | 5,33 | 1,96 | 1,11 | 0,56 | 0,0321  | 0,8000 | 0,1652 | 0,2248 | 0,5305 | 0,3639 |
| PHGDH               | D-3-phosphoglycerate dehydrogenase                                                                                | 5,10 | 5,29 | 5,41 | 1,56 | 2,03 | 1,30 | 0,1435  | 0,0325 | 0,1251 | 0,2397 | 0,2036 | 0,3411 |
| HIST2H3PS2          | Histone H3                                                                                                        | 4,74 | 5,20 | 4,98 | 2,90 | 1,77 | 0,61 | 0,0752  | 0,0326 | 0,3113 | 0,2248 | 0,2036 | 0,4258 |
| EIF3E               | Eukaryotic translation initiation factor 3 subunit E                                                              | 4,40 | 4,38 | 4,51 | 0,94 | 1,28 | 1,36 | 0,7876  | 0,2783 | 0,0327 | 0,4406 | 0,3891 | 0,2831 |
| TOP2B               | DNA topoisomerase 2-beta;DNA topoisomerase 2                                                                      | 5,00 | 5,02 | 4,89 | 1,05 | 0,78 | 0,74 | 0,8504  | 0,3708 | 0,0327 | 0,4582 | 0,4203 | 0,2831 |
| KLC1                | Kinesin light chain 1                                                                                             | 4,83 | 4,82 | 4,64 | 0,99 | 0,64 | 0,65 | 0,9607  | 0,0611 | 0,0328 | 0,4881 | 0,2269 | 0,2831 |
| PDIA4               | Protein disulfide-isomerase A4                                                                                    | 5,18 | 5,07 | 5,29 | 0,77 | 1,27 | 1,65 | 0,2077  | 0,0329 | 0,0405 | 0,2753 | 0,2036 | 0,2831 |
| NAGK                | N-acetyl-D-glucosamine kinase                                                                                     | 4,14 | 4,30 | 4,16 | 1,45 | 1,05 | 0,72 | 0,1593  | 0,8248 | 0,0332 | 0,2480 | 0,5351 | 0,2831 |
| MDH2                | Malate dehydrogenase, mitochondrial;Malate dehydrogenase                                                          | 5,44 | 5,54 | 5,53 | 1,25 | 1,24 | 1,00 | 0,0336  | 0,1937 | 0,9758 | 0,2248 | 0,3206 | 0,6619 |
| RPS23               | 40S ribosomal protein S23                                                                                         | 4,09 | 4,45 | 4,37 | 4,09 | 1,92 | 0,84 | 0,0601  | 0,0339 | 0,6529 | 0,2248 | 0,2036 | 0,5488 |
| FASN                | Fatty acid synthase;[Acyl-carrier-protein] S-acyltransferase;[Acyl-carrier-protein] S-acyltransferase             | 5,67 | 5,50 | 5,57 | 0,67 | 0,79 | 1,18 | 0,0341  | 0,0986 | 0,3043 | 0,2248 | 0,2702 | 0,4247 |
| FLOT1               | Flotillin-1                                                                                                       | 4,28 | 4,45 | 4,52 | 1,49 | 1,75 | 1,17 | 0,1677  | 0,0341 | 0,3707 | 0,2538 | 0,2036 | 0,4438 |
| ECH1                | Delta(3,5)-Delta(2,4)-dienoyl-CoA isomerase, mitochondrial                                                        | 4,37 | 4,68 | 4,74 | 2,06 | 2,38 | 1,16 | 0,0900  | 0,0341 | 0,5487 | 0,2248 | 0,2036 | 0,4987 |
| IPO7                | Importin-7                                                                                                        | 4,70 | 4,61 | 4,62 | 0,82 | 0,84 | 1,02 | 0,0342  | 0,4294 | 0,9427 | 0,2248 | 0,4405 | 0,6561 |
| YWHAE               | 14-3-3 protein epsilon                                                                                            | 5,82 | 6,08 | 5,86 | 1,82 | 1,09 | 0,60 | 0,0349  | 0,8504 | 0,2463 | 0,2248 | 0,5401 | 0,3987 |
| ATP1A3              | Sodium/potassium-transporting ATPase subunit alpha-3                                                              | 5,60 | 5,27 | 5,00 | 0,46 | 0,25 | 0,55 | 0,1794  | 0,0353 | 0,3564 | 0,2587 | 0,2036 | 0,4375 |
| LRRRC59             | Leucine-rich repeat-containing protein 59                                                                         | 4,52 | 4,53 | 4,75 | 1,01 | 1,68 | 1,67 | 0,9474  | 0,0354 | 0,0426 | 0,4834 | 0,2036 | 0,2831 |
| STOML2              | Stomatin-like protein 2, mitochondrial                                                                            | 4,40 | 4,33 | 4,50 | 0,86 | 1,27 | 1,48 | 0,1700  | 0,1242 | 0,0361 | 0,2538 | 0,2810 | 0,2831 |
| NCKAP1              | Nck-associated protein 1                                                                                          | 4,58 | 4,46 | 4,37 | 0,76 | 0,62 | 0,81 | 0,1526  | 0,0361 | 0,3768 | 0,2451 | 0,2036 | 0,4438 |
| GOT2                | Aspartate aminotransferase, mitochondrial                                                                         | 5,11 | 5,12 | 4,96 | 1,04 | 0,71 | 0,68 | 0,7123  | 0,0798 | 0,0369 | 0,4251 | 0,2497 | 0,2831 |
| LDHA                | L-lactate dehydrogenase A chain                                                                                   | 4,80 | 5,14 | 5,51 | 2,15 | 5,10 | 2,38 | 0,2068  | 0,0370 | 0,2131 | 0,2750 | 0,2036 | 0,3949 |
| PGM1                | Phosphoglucomutase-1                                                                                              | 3,71 | 4,09 | 4,49 | 2,39 | 5,95 | 2,48 | 0,2220  | 0,0370 | 0,1327 | 0,2791 | 0,2036 | 0,3491 |
| PPP1R7              | Protein phosphatase 1 regulatory subunit 7                                                                        | 4,40 | 4,55 | 4,39 | 1,44 | 0,98 | 0,68 | 0,0447  | 0,9184 | 0,0372 | 0,2248 | 0,5542 | 0,2831 |
| PRDX3               | Thioredoxin-dependent peroxide reductase, mitochondrial                                                           | 4,64 | 4,86 | 4,79 | 1,68 | 1,41 | 0,84 | 0,0381  | 0,1394 | 0,2207 | 0,2248 | 0,2881 | 0,3949 |
| PRDX5               | Peroxisome oxidoreductin-5, mitochondrial                                                                         | 4,79 | 5,15 | 4,86 | 2,30 | 1,19 | 0,51 | 0,0381  | 0,5959 | 0,1339 | 0,2248 | 0,4911 | 0,3499 |
| SNRPD1              | Small nuclear ribonucleoprotein Sm D1                                                                             | 4,24 | 4,83 | 4,60 | 3,90 | 2,30 | 0,59 | 0,0518  | 0,0386 | 0,3325 | 0,2248 | 0,2066 | 0,4345 |
| RAB2A               | Ras-related protein Rab-2A                                                                                        | 4,76 | 5,09 | 4,80 | 2,13 | 1,08 | 0,51 | 0,0387  | 0,8689 | 0,1329 | 0,2248 | 0,5453 | 0,3491 |
| IMMT                | MICOS complex subunit MIC60                                                                                       | 4,91 | 4,78 | 4,85 | 0,73 | 0,87 | 1,18 | 0,0392  | 0,4006 | 0,3421 | 0,2248 | 0,4318 | 0,4358 |
| HIST1H2BN;HIST1H2BI | Histone H2B;Histone H2B type 1-M;Histone H2B type 1-N;Histone H2B type 1-O                                        | 6,08 | 6,43 | 6,26 | 2,26 | 1,51 | 0,67 | 0,1280  | 0,0393 | 0,3863 | 0,2363 | 0,2066 | 0,4454 |
| CYB5R3              | NADH-cytochrome b5 reductase 3;NADH-cytochrome b5 reductase 3 mitochondrial                                       | 4,95 | 5,12 | 5,02 | 1,46 | 1,18 | 0,81 | 0,1263  | 0,4332 | 0,0394 | 0,2357 | 0,4405 | 0,2831 |
| TP1                 | Triosephosphate isomerase                                                                                         | 5,16 | 5,78 | 5,54 | 4,22 | 2,41 | 0,57 | 0,0397  | 0,1647 | 0,3244 | 0,2248 | 0,3027 | 0,4329 |
| CALR                | Calreticulin                                                                                                      | 5,55 | 5,43 | 5,64 | 0,77 | 1,24 | 1,61 | 0,1730  | 0,1112 | 0,0400 | 0,2560 | 0,2771 | 0,2831 |
| CEP170              | Centrosomal protein of 170 kDa                                                                                    | 4,28 | 4,27 | 3,92 | 0,98 | 0,44 | 0,45 | 0,8898  | 0,0532 | 0,0402 | 0,4703 | 0,2147 | 0,2831 |
| CKAP5               | Cytoskeleton-associated protein 5                                                                                 | 4,59 | 4,53 | 4,14 | 0,88 | 0,36 | 0,41 | 0,6220  | 0,0403 | 0,0526 | 0,3979 | 0,2066 | 0,2833 |
| PRKDC               | DNA-dependent protein kinase catalytic subunit                                                                    | 5,49 | 5,37 | 5,53 | 0,76 | 1,09 | 1,44 | 0,1840  | 0,6423 | 0,0406 | 0,2598 | 0,5066 | 0,2831 |
| YWHAQ               | 14-3-3 protein theta                                                                                              | 5,27 | 5,45 | 5,17 | 1,48 | 0,79 | 0,53 | 0,0406  | 0,5334 | 0,1354 | 0,2248 | 0,4701 | 0,3500 |
| MAP4                | Microtubule-associated protein;Microtubule-associated protein 4                                                   | 4,76 | 4,58 | 4,66 | 0,67 | 0,81 | 1,20 | 0,0411  | 0,4601 | 0,4908 | 0,2248 | 0,4491 | 0,4752 |

|                  |                                                                             |      |      |      |      |      |      |        |        |        |        |        |        |
|------------------|-----------------------------------------------------------------------------|------|------|------|------|------|------|--------|--------|--------|--------|--------|--------|
| CSNK2A1;CSNK2A3  | Casein kinase II subunit alpha;Casein kinase II subunit alpha 3             | 4,49 | 4,65 | 4,46 | 1,45 | 0,94 | 0,64 | 0,1169 | 0,7826 | 0,0411 | 0,2299 | 0,5305 | 0,2831 |
| GNAS             | Guanine nucleotide-binding protein G(s) subunit alpha isoforms short;Gu     | 5,19 | 5,28 | 5,04 | 1,25 | 0,72 | 0,58 | 0,1624 | 0,1495 | 0,0413 | 0,2506 | 0,2932 | 0,2831 |
| DYNC1L1          | Cytoplasmic dynein 1 light intermediate chain 1                             | 4,44 | 4,48 | 4,24 | 1,11 | 0,63 | 0,57 | 0,7423 | 0,2619 | 0,0414 | 0,4295 | 0,3799 | 0,2831 |
| HSPA1A           | Heat shock 70 kDa protein 1A/1B                                             | 5,27 | 5,35 | 5,28 | 1,20 | 1,04 | 0,86 | 0,0415 | 0,8760 | 0,5104 | 0,2248 | 0,5472 | 0,4794 |
| H2AFY            | Core histone macro-H2A.1;Histone H2A                                        | 5,25 | 5,29 | 5,08 | 1,08 | 0,68 | 0,63 | 0,5333 | 0,0564 | 0,0423 | 0,3789 | 0,2189 | 0,2831 |
| EIF3C;EIF3CL     | Eukaryotic translation initiation factor 3 subunit C;Eukaryotic translation | 4,29 | 4,06 | 4,19 | 0,60 | 0,80 | 1,33 | 0,1143 | 0,4288 | 0,0424 | 0,2283 | 0,4405 | 0,2831 |
| DNM1             | Dynamin-1                                                                   | 4,64 | 4,51 | 4,13 | 0,74 | 0,31 | 0,42 | 0,5628 | 0,0430 | 0,0601 | 0,3841 | 0,2066 | 0,2918 |
| RPL18            | 60S ribosomal protein L18                                                   | 4,52 | 4,82 | 4,97 | 1,97 | 2,79 | 1,42 | 0,1428 | 0,0435 | 0,3366 | 0,2397 | 0,2066 | 0,4350 |
| TMED10           | Transmembrane emp24 domain-containing protein 10                            | 4,47 | 4,50 | 4,69 | 1,08 | 1,68 | 1,55 | 0,7785 | 0,0435 | 0,2207 | 0,4393 | 0,2066 | 0,3949 |
| ITGB1            | Integrin beta-1                                                             | 4,23 | 4,10 | 4,55 | 0,73 | 2,05 | 2,79 | 0,5915 | 0,3043 | 0,0438 | 0,3926 | 0,4054 | 0,2831 |
| TMED2            | Transmembrane emp24 domain-containing protein 2                             | 4,16 | 4,47 | 4,51 | 2,05 | 2,25 | 1,10 | 0,0440 | 0,0448 | 0,7853 | 0,2248 | 0,2066 | 0,6027 |
| RPS3             | 40S ribosomal protein S3                                                    | 5,23 | 5,28 | 5,40 | 1,13 | 1,50 | 1,33 | 0,3594 | 0,0441 | 0,0596 | 0,3262 | 0,2066 | 0,2918 |
| PAK2             | Serine/threonine-protein kinase PAK 2;PAK-2p27;PAK-2p34                     | 4,23 | 4,42 | 3,99 | 1,54 | 0,57 | 0,37 | 0,3156 | 0,0574 | 0,0443 | 0,3185 | 0,2189 | 0,2831 |
| PRDX1            | Peroxiredoxin-1                                                             | 5,15 | 5,44 | 5,42 | 1,94 | 1,86 | 0,96 | 0,0864 | 0,0444 | 0,8939 | 0,2248 | 0,2066 | 0,6445 |
| FH               | Fumarate hydratase, mitochondrial                                           | 4,90 | 4,74 | 4,75 | 0,68 | 0,70 | 1,03 | 0,0446 | 0,2612 | 0,9291 | 0,2248 | 0,3799 | 0,6545 |
| IMPDH2           | Inosine-5-monophosphate dehydrogenase 2                                     | 4,49 | 4,54 | 4,71 | 1,13 | 1,68 | 1,49 | 0,7405 | 0,0453 | 0,2603 | 0,4293 | 0,2066 | 0,4124 |
| ANXA5            | Annexin A5;Annexin                                                          | 5,56 | 5,56 | 5,88 | 1,00 | 2,07 | 2,07 | 0,9993 | 0,0454 | 0,0490 | 0,4969 | 0,2066 | 0,2831 |
| DDX3X            | ATP-dependent RNA helicase DDX3X                                            | 4,91 | 4,82 | 4,86 | 0,81 | 0,89 | 1,10 | 0,0456 | 0,6335 | 0,6919 | 0,2248 | 0,5035 | 0,5682 |
| RPS3A            | 40S ribosomal protein S3a                                                   | 4,52 | 4,58 | 4,70 | 1,15 | 1,50 | 1,31 | 0,4093 | 0,0459 | 0,1264 | 0,3458 | 0,2066 | 0,3411 |
| RALA             | Ras-related protein Ral-A                                                   | 4,36 | 4,53 | 4,42 | 1,47 | 1,13 | 0,77 | 0,0460 | 0,5384 | 0,1255 | 0,2248 | 0,4701 | 0,3411 |
| AP2B1            | AP-2 complex subunit beta                                                   | 5,19 | 5,11 | 5,02 | 0,83 | 0,68 | 0,81 | 0,3030 | 0,0463 | 0,3327 | 0,3158 | 0,2066 | 0,4345 |
| RAC1;RAC2        | Ras-related C3 botulinum toxin substrate 1;Ras-related C3 botulinum to      | 4,34 | 4,57 | 4,49 | 1,69 | 1,39 | 0,82 | 0,0467 | 0,1342 | 0,3916 | 0,2248 | 0,2815 | 0,4472 |
| TSN              | Translin                                                                    | 4,17 | 4,68 | 4,48 | 3,23 | 2,00 | 0,62 | 0,0468 | 0,2037 | 0,3610 | 0,2248 | 0,3318 | 0,4375 |
| PRDX2            | Peroxiredoxin-2                                                             | 4,92 | 5,45 | 5,02 | 3,42 | 1,24 | 0,36 | 0,0470 | 0,6245 | 0,1041 | 0,2248 | 0,5017 | 0,3299 |
| CKAP4            | Cytoskeleton-associated protein 4                                           | 5,27 | 4,96 | 5,35 | 0,49 | 1,21 | 2,48 | 0,0519 | 0,5673 | 0,0472 | 0,2248 | 0,4749 | 0,2831 |
| UQCRC2           | Cytochrome b-c1 complex subunit 2, mitochondrial                            | 4,95 | 4,76 | 4,80 | 0,65 | 0,72 | 1,10 | 0,0473 | 0,1194 | 0,5044 | 0,2248 | 0,2810 | 0,4794 |
| ARPC4-TTL3;ARPC4 | Actin-related protein 2/3 complex subunit 4                                 | 4,49 | 4,80 | 4,70 | 2,03 | 1,62 | 0,80 | 0,0478 | 0,0885 | 0,4993 | 0,2248 | 0,2550 | 0,4781 |
| INA              | Alpha-internexin                                                            | 5,93 | 5,42 | 4,36 | 0,31 | 0,03 | 0,09 | 0,0478 | 0,1429 | 0,2913 | 0,2248 | 0,2908 | 0,4247 |
| DDX6             | Probable ATP-dependent RNA helicase DDX6                                    | 4,81 | 4,84 | 4,70 | 1,07 | 0,77 | 0,72 | 0,4804 | 0,1549 | 0,0483 | 0,3631 | 0,2956 | 0,2831 |
| SLC25A1          | Tricarboxylate transport protein, mitochondrial                             | 4,45 | 4,62 | 4,49 | 1,46 | 1,09 | 0,75 | 0,0484 | 0,7987 | 0,3604 | 0,2248 | 0,5305 | 0,4375 |
| NIPSNAP1         | Protein NipSnap homolog 1                                                   | 4,52 | 4,80 | 4,44 | 1,94 | 0,84 | 0,43 | 0,0484 | 0,4892 | 0,0529 | 0,2248 | 0,4608 | 0,2833 |
| ACTR1A           | Alpha-centractin                                                            | 5,08 | 5,17 | 4,92 | 1,22 | 0,68 | 0,56 | 0,1230 | 0,1238 | 0,0485 | 0,2351 | 0,2810 | 0,2831 |
| GNB1             | Guanine nucleotide-binding protein G(i)/G(s)/G(t) subunit beta-1            | 4,74 | 4,84 | 4,46 | 1,25 | 0,52 | 0,42 | 0,0488 | 0,1199 | 0,0531 | 0,2248 | 0,2810 | 0,2833 |
| TUBB2A           | Tubulin beta-2A chain                                                       | 6,87 | 6,88 | 6,59 | 1,02 | 0,52 | 0,51 | 0,9084 | 0,0683 | 0,0489 | 0,4741 | 0,2315 | 0,2831 |
| 09. Sep          | Septin-9                                                                    | 4,59 | 4,81 | 4,89 | 1,66 | 2,00 | 1,20 | 0,0492 | 0,0664 | 0,4913 | 0,2248 | 0,2293 | 0,4752 |
| TMEM43           | Transmembrane protein 43                                                    | 4,35 | 4,28 | 4,59 | 0,85 | 1,73 | 2,03 | 0,3929 | 0,1079 | 0,0493 | 0,3397 | 0,2771 | 0,2831 |
| TUBB3            | Tubulin beta-3 chain                                                        | 6,18 | 6,23 | 5,65 | 1,12 | 0,30 | 0,26 | 0,6508 | 0,0814 | 0,0496 | 0,4056 | 0,2497 | 0,2831 |
| EEF2             | Elongation factor 2                                                         | 5,66 | 5,60 | 5,74 | 0,87 | 1,21 | 1,39 | 0,0756 | 0,2090 | 0,0498 | 0,2248 | 0,3353 | 0,2831 |
| GNAI2            | Guanine nucleotide-binding protein G(i) subunit alpha-2                     | 5,25 | 5,31 | 5,00 | 1,14 | 0,56 | 0,49 | 0,0501 | 0,3363 | 0,2495 | 0,2248 | 0,4142 | 0,4018 |
| NOP58            | Nucleolar protein 58                                                        | 4,23 | 4,37 | 4,58 | 1,36 | 2,20 | 1,61 | 0,1972 | 0,0513 | 0,1698 | 0,2688 | 0,2147 | 0,3685 |
| NDUFS1           | NADH-ubiquinone oxidoreductase 75 kDa subunit, mitochondrial                | 4,66 | 4,39 | 4,30 | 0,54 | 0,44 | 0,81 | 0,2940 | 0,0516 | 0,6886 | 0,3115 | 0,2147 | 0,5674 |
| RPS8             | 40S ribosomal protein S8                                                    | 4,86 | 5,05 | 5,21 | 1,54 | 2,24 | 1,46 | 0,2252 | 0,0518 | 0,1190 | 0,2811 | 0,2147 | 0,3392 |
| CKB              | Creatine kinase B-type                                                      | 5,99 | 6,28 | 5,93 | 1,98 | 0,88 | 0,45 | 0,0758 | 0,6597 | 0,0521 | 0,2248 | 0,5107 | 0,2833 |
| DHX15            | Putative pre-mRNA-splicing factor ATP-dependent RNA helicase DHX15          | 4,79 | 4,88 | 4,88 | 1,22 | 1,21 | 0,99 | 0,1593 | 0,0523 | 0,9445 | 0,2480 | 0,2147 | 0,6561 |
| 07. Sep          | Septin-7                                                                    | 5,06 | 5,08 | 5,00 | 1,04 | 0,88 | 0,84 | 0,4705 | 0,0718 | 0,0524 | 0,3631 | 0,2356 | 0,2833 |
| XPO1             | Exportin-1                                                                  | 4,97 | 4,82 | 4,96 | 0,70 | 0,96 | 1,38 | 0,0529 | 0,7871 | 0,1222 | 0,2248 | 0,5305 | 0,3392 |
| PRDX6            | Peroxiredoxin-6                                                             | 5,04 | 5,21 | 5,46 | 1,48 | 2,60 | 1,75 | 0,1286 | 0,0534 | 0,2208 | 0,2363 | 0,2147 | 0,3949 |
| MAP4K4;MINK1     | Mitogen-activated protein kinase kinase kinase kinase 4;Misshapen-like      | 4,16 | 4,04 | 3,96 | 0,75 | 0,62 | 0,83 | 0,4760 | 0,0535 | 0,6422 | 0,3631 | 0,2147 | 0,5457 |
| AK1              | Adenylate kinase isoenzyme 1                                                | 4,44 | 4,94 | 5,08 | 3,21 | 4,36 | 1,36 | 0,0933 | 0,0536 | 0,1212 | 0,2248 | 0,2147 | 0,3392 |
| DLAT             | Acetyltransferase component of pyruvate dehydrogenase complex;Dihy          | 4,47 | 4,30 | 4,37 | 0,67 | 0,79 | 1,17 | 0,0537 | 0,3548 | 0,5195 | 0,2248 | 0,4175 | 0,4860 |
| PAFAH1B3         | Platelet-activating factor acetylhydrolase IB subunit gamma                 | 4,82 | 5,20 | 4,13 | 2,44 | 0,21 | 0,08 | 0,0671 | 0,1594 | 0,0542 | 0,2248 | 0,2982 | 0,2848 |
| THY1             | Thy-1 membrane glycoprotein                                                 | 4,16 | 3,97 | 4,52 | 0,65 | 2,29 | 3,52 | 0,4860 | 0,0542 | 0,0785 | 0,3631 | 0,2147 | 0,2918 |
| PPIA             | Peptidyl-prolyl cis-trans isomerase A;Peptidyl-prolyl cis-trans isomerase   | 5,39 | 5,78 | 5,59 | 2,51 | 1,59 | 0,64 | 0,0543 | 0,1302 | 0,2961 | 0,2248 | 0,2810 | 0,4247 |
| CRKL             | Crk-like protein                                                            | 4,37 | 4,63 | 4,39 | 1,82 | 1,04 | 0,57 | 0,1234 | 0,8633 | 0,0546 | 0,2351 | 0,5442 | 0,2848 |
| PFKL             | ATP-dependent 6-phosphofructokinase, liver type                             | 4,93 | 5,14 | 5,01 | 1,60 | 1,18 | 0,74 | 0,0551 | 0,5424 | 0,1731 | 0,2248 | 0,4701 | 0,3691 |
| ACTN1            | Alpha-actinin-1                                                             | 5,14 | 4,12 | 4,97 | 0,09 | 0,68 | 7,18 | 0,0824 | 0,6724 | 0,0551 | 0,2248 | 0,5150 | 0,2848 |
| VAT1             | Synaptic vesicle membrane protein VAT-1 homolog                             | 5,34 | 5,17 | 5,03 | 0,67 | 0,49 | 0,74 | 0,1497 | 0,0552 | 0,3312 | 0,2432 | 0,2166 | 0,4345 |

|                    |                                                                         |      |      |      |      |      |      |        |        |        |        |        |        |
|--------------------|-------------------------------------------------------------------------|------|------|------|------|------|------|--------|--------|--------|--------|--------|--------|
| PSMA5              | Proteasome subunit alpha type-5                                         | 4,59 | 4,90 | 4,85 | 2,03 | 1,81 | 0,89 | 0,0563 | 0,0661 | 0,6319 | 0,2248 | 0,2293 | 0,5402 |
| PLEKHH3            | Pleckstrin homology domain-containing family H member 3                 | 4,75 | 4,83 | 4,42 | 1,20 | 0,47 | 0,39 | 0,3073 | 0,1042 | 0,0566 | 0,3184 | 0,2759 | 0,2895 |
| CIRBP              | Cold-inducible RNA-binding protein                                      | 4,44 | 4,85 | 4,68 | 2,62 | 1,76 | 0,67 | 0,0568 | 0,2182 | 0,2085 | 0,2248 | 0,3475 | 0,3949 |
| NSF                | Vesicle-fusing ATPase                                                   | 4,99 | 4,84 | 4,83 | 0,71 | 0,69 | 0,98 | 0,2626 | 0,0573 | 0,9440 | 0,2956 | 0,2189 | 0,6561 |
| FUBP3              | Far upstream element-binding protein 3                                  | 4,05 | 4,10 | 4,30 | 1,14 | 1,79 | 1,58 | 0,7231 | 0,1663 | 0,0575 | 0,4289 | 0,3027 | 0,2909 |
| ELAVL1             | ELAV-like protein 1                                                     | 4,85 | 4,90 | 4,83 | 1,13 | 0,96 | 0,85 | 0,2744 | 0,7060 | 0,0587 | 0,3042 | 0,5201 | 0,2918 |
| CFL1               | Cofilin-1                                                               | 5,49 | 5,78 | 5,60 | 1,93 | 1,27 | 0,65 | 0,0593 | 0,2918 | 0,1588 | 0,2248 | 0,3962 | 0,3626 |
| SUGP2              | SURP and G-patch domain-containing protein 2                            | 3,79 | 3,67 | 3,80 | 0,76 | 1,04 | 1,36 | 0,0597 | 0,8716 | 0,2372 | 0,2248 | 0,5453 | 0,3949 |
| CORO1C             | Coronin;Coronin-1C                                                      | 4,74 | 4,81 | 4,53 | 1,19 | 0,62 | 0,52 | 0,3524 | 0,0945 | 0,0612 | 0,3239 | 0,2643 | 0,2918 |
| GLO1               | Lactoylglutathione lyase                                                | 4,34 | 4,54 | 4,59 | 1,57 | 1,79 | 1,14 | 0,2406 | 0,0623 | 0,7167 | 0,2853 | 0,2276 | 0,5751 |
| MYH10              | Myosin-10                                                               | 5,63 | 5,50 | 5,61 | 0,75 | 0,95 | 1,26 | 0,0628 | 0,7499 | 0,1801 | 0,2248 | 0,5268 | 0,3754 |
| HNRNPH3            | Heterogeneous nuclear ribonucleoprotein H3                              | 4,97 | 5,18 | 5,01 | 1,61 | 1,09 | 0,68 | 0,1312 | 0,7282 | 0,0632 | 0,2376 | 0,5245 | 0,2918 |
| NUDT11;NUDT10      | Diphosphoinositol polyphosphate phosphohydrolase 3-beta;Diphosphoin     | 3,19 | 3,41 | 3,16 | 1,67 | 0,95 | 0,57 | 0,0639 | 0,8138 | 0,1019 | 0,2248 | 0,5333 | 0,3270 |
| PAFAH1B2           | Platelet-activating factor acetylhydrolase IB subunit beta              | 4,44 | 4,77 | 4,59 | 2,13 | 1,42 | 0,67 | 0,0640 | 0,3272 | 0,1304 | 0,2248 | 0,4137 | 0,3491 |
| ARPC1A             | Actin-related protein 2/3 complex subunit 1A                            | 4,79 | 4,82 | 4,69 | 1,08 | 0,80 | 0,74 | 0,1700 | 0,1203 | 0,0641 | 0,2538 | 0,2810 | 0,2918 |
| RPL27              | 60S ribosomal protein L27                                               | 4,52 | 4,69 | 4,80 | 1,48 | 1,87 | 1,26 | 0,3232 | 0,0643 | 0,5091 | 0,3185 | 0,2293 | 0,4794 |
| RARS               | Arginine--tRNA ligase, cytoplasmic                                      | 4,47 | 4,40 | 4,55 | 0,85 | 1,20 | 1,41 | 0,2316 | 0,0727 | 0,0644 | 0,2816 | 0,2356 | 0,2918 |
| VIM                | Vimentin                                                                | 6,80 | 6,53 | 6,68 | 0,54 | 0,76 | 1,41 | 0,0645 | 0,4984 | 0,3925 | 0,2248 | 0,4619 | 0,4473 |
| HYOU1              | Hypoxia up-regulated protein 1                                          | 5,32 | 4,87 | 5,23 | 0,35 | 0,82 | 2,31 | 0,0647 | 0,3654 | 0,1373 | 0,2248 | 0,4200 | 0,3513 |
| MT-CO2             | Cytochrome c oxidase subunit 2                                          | 4,52 | 4,70 | 4,71 | 1,50 | 1,55 | 1,04 | 0,0649 | 0,1709 | 0,9090 | 0,2248 | 0,3057 | 0,6468 |
| RPL6               | 60S ribosomal protein L6                                                | 4,66 | 4,86 | 5,01 | 1,59 | 2,26 | 1,43 | 0,5185 | 0,2749 | 0,0649 | 0,3756 | 0,3887 | 0,2918 |
| MARS               | Methionine--tRNA ligase, cytoplasmic                                    | 4,18 | 3,96 | 4,19 | 0,59 | 1,02 | 1,72 | 0,0651 | 0,8836 | 0,0865 | 0,2248 | 0,5472 | 0,3018 |
| PSMB1              | Proteasome subunit beta type-1                                          | 4,16 | 4,78 | 4,78 | 4,16 | 4,14 | 0,99 | 0,0797 | 0,0652 | 0,9858 | 0,2248 | 0,2293 | 0,6619 |
| NUDC               | Nuclear migration protein nudC                                          | 4,49 | 4,40 | 4,33 | 0,82 | 0,69 | 0,84 | 0,0655 | 0,4694 | 0,7203 | 0,2248 | 0,4550 | 0,5771 |
| GANAB              | Neutral alpha-glucosidase AB                                            | 5,46 | 5,41 | 5,59 | 0,90 | 1,35 | 1,51 | 0,4202 | 0,1673 | 0,0658 | 0,3481 | 0,3028 | 0,2918 |
| HSPA5              | 78 kDa glucose-regulated protein                                        | 5,94 | 5,77 | 6,04 | 0,68 | 1,27 | 1,87 | 0,1202 | 0,2867 | 0,0658 | 0,2314 | 0,3914 | 0,2918 |
| EEF1D              | Elongation factor 1-delta                                               | 4,81 | 4,81 | 4,88 | 0,99 | 1,17 | 1,18 | 0,9336 | 0,2402 | 0,0660 | 0,4790 | 0,3640 | 0,2918 |
| RPS9               | 40S ribosomal protein S9                                                | 4,82 | 4,92 | 5,08 | 1,25 | 1,82 | 1,45 | 0,4051 | 0,0666 | 0,2468 | 0,3448 | 0,2293 | 0,3987 |
| NME1-NME2;NME2;NI  | Nucleoside diphosphate kinase;Nucleoside diphosphate kinase B;Nucleo    | 4,86 | 5,06 | 5,07 | 1,58 | 1,64 | 1,03 | 0,5098 | 0,0675 | 0,9606 | 0,3714 | 0,2307 | 0,6584 |
| MYH9               | Myosin-9                                                                | 5,34 | 4,88 | 5,27 | 0,35 | 0,84 | 2,42 | 0,1130 | 0,6985 | 0,0677 | 0,2283 | 0,5201 | 0,2918 |
| EFTUD2             | 116 kDa U5 small nuclear ribonucleoprotein component                    | 4,82 | 4,75 | 4,83 | 0,85 | 1,01 | 1,19 | 0,3462 | 0,9598 | 0,0680 | 0,3239 | 0,5624 | 0,2918 |
| SRM                | Spermidine synthase                                                     | 4,19 | 4,27 | 4,41 | 1,20 | 1,67 | 1,39 | 0,4405 | 0,1073 | 0,0683 | 0,3524 | 0,2771 | 0,2918 |
| RANBP1             | Ran-specific GTPase-activating protein                                  | 4,21 | 4,51 | 4,31 | 2,00 | 1,26 | 0,63 | 0,0688 | 0,3366 | 0,1101 | 0,2248 | 0,4142 | 0,3354 |
| MAP1B              | Microtubule-associated protein 1B;MAP1B heavy chain;MAP1 light chain    | 6,19 | 6,02 | 5,54 | 0,68 | 0,23 | 0,33 | 0,0689 | 0,1522 | 0,2663 | 0,2248 | 0,2943 | 0,4135 |
| RPS2               | 40S ribosomal protein S2                                                | 4,76 | 4,97 | 5,05 | 1,62 | 1,92 | 1,18 | 0,2396 | 0,1319 | 0,0689 | 0,2853 | 0,2810 | 0,2918 |
| HIST2H2AC;HIST2H2A | Histone H2A type 2-C;Histone H2A type 2-A                               | 5,38 | 5,72 | 5,63 | 2,22 | 1,80 | 0,81 | 0,0901 | 0,0696 | 0,5059 | 0,2248 | 0,2322 | 0,4794 |
| PEBP1              | Phosphatidylethanolamine-binding protein 1;Hippocampal cholinergic ne   | 4,91 | 5,35 | 4,76 | 2,79 | 0,72 | 0,26 | 0,0698 | 0,6274 | 0,0797 | 0,2248 | 0,5017 | 0,2918 |
| PSMC3              | 26S protease regulatory subunit 6A                                      | 4,54 | 4,70 | 4,61 | 1,46 | 1,17 | 0,80 | 0,2828 | 0,6168 | 0,0702 | 0,3074 | 0,4995 | 0,2918 |
| CAPN1              | Calpain-1 catalytic subunit                                             | 4,40 | 4,28 | 4,44 | 0,77 | 1,10 | 1,43 | 0,2388 | 0,7074 | 0,0710 | 0,2853 | 0,5201 | 0,2918 |
| FLNA               | Filamin-A                                                               | 5,84 | 5,46 | 5,76 | 0,42 | 0,84 | 2,00 | 0,0712 | 0,5243 | 0,1222 | 0,2248 | 0,4695 | 0,3392 |
| ACTR1B             | Beta-centractin                                                         | 4,23 | 4,28 | 4,14 | 1,11 | 0,82 | 0,73 | 0,3423 | 0,2533 | 0,0719 | 0,3236 | 0,3725 | 0,2918 |
| RCN2               | Reticulocalbin-2                                                        | 4,61 | 4,70 | 4,55 | 1,21 | 0,86 | 0,71 | 0,3832 | 0,3577 | 0,0720 | 0,3337 | 0,4197 | 0,2918 |
| SPTAN1             | Spectrin alpha chain, non-erythrocytic 1                                | 5,83 | 5,62 | 5,75 | 0,61 | 0,83 | 1,38 | 0,1977 | 0,0723 | 0,3912 | 0,2688 | 0,2356 | 0,4472 |
| HSD17B10           | 3-hydroxyacyl-CoA dehydrogenase type-2                                  | 4,85 | 4,93 | 5,01 | 1,20 | 1,45 | 1,20 | 0,0729 | 0,0841 | 0,3079 | 0,2248 | 0,2497 | 0,4247 |
| ACOX1              | Peroxisomal acyl-coenzyme A oxidase 1                                   | 4,15 | 4,07 | 3,99 | 0,84 | 0,69 | 0,82 | 0,5080 | 0,0729 | 0,4538 | 0,3710 | 0,2356 | 0,4681 |
| TNC                | Tenascin                                                                | 4,80 | 4,21 | 4,89 | 0,26 | 1,21 | 4,73 | 0,1479 | 0,8120 | 0,0732 | 0,2425 | 0,5333 | 0,2918 |
| TRA2B              | Transformer-2 protein homolog beta                                      | 4,29 | 4,46 | 4,34 | 1,48 | 1,12 | 0,75 | 0,4282 | 0,8109 | 0,0735 | 0,3505 | 0,5333 | 0,2918 |
| PTMS               | Parathyrosin                                                            | 3,48 | 4,26 | 3,96 | 5,98 | 3,01 | 0,50 | 0,0747 | 0,1129 | 0,4106 | 0,2248 | 0,2780 | 0,4542 |
| ENO1               | Alpha-enolase                                                           | 5,87 | 6,14 | 6,03 | 1,87 | 1,47 | 0,79 | 0,0749 | 0,4311 | 0,6317 | 0,2248 | 0,4405 | 0,5402 |
| SRP14              | Signal recognition particle 14 kDa protein                              | 4,45 | 4,88 | 4,68 | 2,67 | 1,69 | 0,63 | 0,0749 | 0,1301 | 0,2744 | 0,2248 | 0,2810 | 0,4183 |
| ALDOA              | Fructose-bisphosphate aldolase A                                        | 5,28 | 5,47 | 5,29 | 1,57 | 1,02 | 0,65 | 0,0751 | 0,9253 | 0,0840 | 0,2248 | 0,5568 | 0,3013 |
| ACTR2              | Actin-related protein 2                                                 | 4,93 | 4,99 | 4,79 | 1,15 | 0,72 | 0,63 | 0,0751 | 0,3147 | 0,1736 | 0,2248 | 0,4115 | 0,3691 |
| DDOST              | Dolichyl-diphosphooligosaccharide--protein glycosyltransferase 48 kDa s | 4,87 | 4,80 | 4,98 | 0,86 | 1,30 | 1,51 | 0,1986 | 0,2392 | 0,0754 | 0,2691 | 0,3640 | 0,2918 |
| HTRA1              | Serine protease HTRA1                                                   | 4,71 | 4,05 | 4,81 | 0,22 | 1,28 | 5,71 | 0,1461 | 0,7407 | 0,0755 | 0,2425 | 0,5259 | 0,2918 |
| GNB2               | Guanine nucleotide-binding protein G(I)/G(S)/G(T) subunit beta-2        | 5,05 | 5,08 | 4,84 | 1,07 | 0,61 | 0,58 | 0,5434 | 0,1097 | 0,0766 | 0,3801 | 0,2771 | 0,2918 |
| COP55              | COP9 signalosome complex subunit 5                                      | 3,99 | 4,21 | 4,13 | 1,64 | 1,36 | 0,83 | 0,0767 | 0,2294 | 0,4560 | 0,2248 | 0,3560 | 0,4681 |
| AKR7A2             | Aflatoxin B1 aldehyde reductase member 2                                | 4,17 | 4,37 | 4,33 | 1,61 | 1,45 | 0,90 | 0,0769 | 0,1099 | 0,5261 | 0,2248 | 0,2771 | 0,4886 |

|                    |                                                                                                             |      |      |      |      |      |      |        |        |        |        |        |        |
|--------------------|-------------------------------------------------------------------------------------------------------------|------|------|------|------|------|------|--------|--------|--------|--------|--------|--------|
| CAND1              | Cullin-associated NEDD8-dissociated protein 1                                                               | 5,43 | 5,47 | 5,33 | 1,09 | 0,81 | 0,74 | 0,6466 | 0,3642 | 0,0772 | 0,4050 | 0,4200 | 0,2918 |
| GAPDH              | Glyceraldehyde-3-phosphate dehydrogenase                                                                    | 6,26 | 6,41 | 6,18 | 1,43 | 0,84 | 0,59 | 0,0810 | 0,4578 | 0,0773 | 0,2248 | 0,4491 | 0,2918 |
| PRKCSH             | Glucosidase 2 subunit beta                                                                                  | 4,84 | 4,71 | 4,93 | 0,74 | 1,24 | 1,66 | 0,0893 | 0,3451 | 0,0773 | 0,2248 | 0,4142 | 0,2918 |
| COPG1              | Coatomer subunit gamma-1                                                                                    | 4,22 | 4,14 | 4,45 | 0,83 | 1,70 | 2,04 | 0,4474 | 0,1775 | 0,0778 | 0,3558 | 0,3070 | 0,2918 |
| TUBB6              | Tubulin beta-6 chain                                                                                        | 5,41 | 5,03 | 5,13 | 0,42 | 0,53 | 1,27 | 0,0778 | 0,4772 | 0,8008 | 0,2248 | 0,4594 | 0,6098 |
| HSPA4              | Heat shock 70 kDa protein 4                                                                                 | 5,10 | 5,11 | 5,02 | 1,03 | 0,83 | 0,81 | 0,8497 | 0,2874 | 0,0785 | 0,4582 | 0,3914 | 0,2918 |
| CCAR1              | Cell division cycle and apoptosis regulator protein 1                                                       | 4,11 | 4,58 | 4,39 | 2,98 | 1,91 | 0,64 | 0,0978 | 0,0792 | 0,4075 | 0,2248 | 0,2497 | 0,4542 |
| COPA               | Coatomer subunit alpha;Xenin;Proxenin                                                                       | 4,87 | 4,63 | 4,91 | 0,57 | 1,09 | 1,91 | 0,0792 | 0,6270 | 0,0847 | 0,2248 | 0,5017 | 0,3016 |
| USP7               | Ubiquitin carboxyl-terminal hydrolase 7;Ubiquitin carboxyl-terminal hydrolase 7                             | 4,33 | 4,17 | 4,02 | 0,70 | 0,49 | 0,71 | 0,0888 | 0,0792 | 0,2871 | 0,2248 | 0,2497 | 0,4247 |
| DCLK2              | Serine/threonine-protein kinase DCLK2                                                                       | 5,17 | 5,31 | 4,90 | 1,39 | 0,53 | 0,38 | 0,5081 | 0,0829 | 0,0799 | 0,3710 | 0,2497 | 0,2918 |
| YWHAH              | 14-3-3 protein eta                                                                                          | 4,53 | 4,61 | 4,22 | 1,20 | 0,49 | 0,41 | 0,4797 | 0,1840 | 0,0802 | 0,3631 | 0,3081 | 0,2918 |
| RPL10A             | 60S ribosomal protein L10a                                                                                  | 4,60 | 4,80 | 4,89 | 1,56 | 1,94 | 1,24 | 0,2316 | 0,0812 | 0,4551 | 0,2816 | 0,2497 | 0,4681 |
| RPL12              | 60S ribosomal protein L12                                                                                   | 4,20 | 4,49 | 4,50 | 1,97 | 2,02 | 1,03 | 0,0911 | 0,0813 | 0,9293 | 0,2248 | 0,2497 | 0,6545 |
| EPB41L3            | Band 4.1-like protein 3;Band 4.1-like protein 3, N-terminally processed                                     | 4,88 | 3,83 | 4,45 | 0,09 | 0,38 | 4,19 | 0,0816 | 0,3679 | 0,3681 | 0,2248 | 0,4200 | 0,4420 |
| RPL14              | 60S ribosomal protein L14                                                                                   | 4,47 | 4,55 | 4,67 | 1,20 | 1,58 | 1,31 | 0,4713 | 0,0818 | 0,3429 | 0,3631 | 0,2497 | 0,4358 |
| VAT1L              | Synaptic vesicle membrane protein VAT-1 homolog-like                                                        | 4,55 | 4,44 | 3,86 | 0,78 | 0,20 | 0,26 | 0,7520 | 0,0820 | 0,1116 | 0,4325 | 0,2497 | 0,3354 |
| EIF4G1             | Eukaryotic translation initiation factor 4 gamma 1                                                          | 4,47 | 4,30 | 4,45 | 0,68 | 0,97 | 1,42 | 0,0824 | 0,9030 | 0,2532 | 0,2248 | 0,5472 | 0,4050 |
| RAB14              | Ras-related protein Rab-14                                                                                  | 4,60 | 4,78 | 4,61 | 1,55 | 1,04 | 0,68 | 0,0837 | 0,5615 | 0,1099 | 0,2248 | 0,4712 | 0,3354 |
| RPL11              | 60S ribosomal protein L11                                                                                   | 4,57 | 4,70 | 4,81 | 1,35 | 1,72 | 1,28 | 0,3353 | 0,0838 | 0,4808 | 0,3221 | 0,2497 | 0,4752 |
| UQCRC1             | Cytochrome b-c1 complex subunit 1, mitochondrial                                                            | 4,58 | 4,44 | 4,46 | 0,74 | 0,76 | 1,04 | 0,0841 | 0,2370 | 0,8358 | 0,2248 | 0,3633 | 0,6219 |
| RPL9               | 60S ribosomal protein L9                                                                                    | 4,60 | 4,83 | 4,97 | 1,69 | 2,35 | 1,39 | 0,2426 | 0,0843 | 0,2142 | 0,2853 | 0,2497 | 0,3949 |
| DNAJA1             | DnaJ homolog subfamily A member 1                                                                           | 4,38 | 4,23 | 4,22 | 0,71 | 0,70 | 0,98 | 0,0844 | 0,1270 | 0,9104 | 0,2248 | 0,2810 | 0,6468 |
| FSCN1              | Fascin                                                                                                      | 5,43 | 5,57 | 5,45 | 1,37 | 1,05 | 0,76 | 0,0844 | 0,7813 | 0,1490 | 0,2248 | 0,5305 | 0,3570 |
| VAPA               | Vesicle-associated membrane protein-associated protein A                                                    | 4,52 | 4,68 | 4,48 | 1,46 | 0,92 | 0,63 | 0,0846 | 0,8199 | 0,2031 | 0,2248 | 0,5343 | 0,3887 |
| HSP90AB1           | Heat shock protein HSP 90-beta                                                                              | 5,65 | 5,68 | 5,77 | 1,07 | 1,30 | 1,22 | 0,5601 | 0,0852 | 0,1001 | 0,3838 | 0,2498 | 0,3265 |
| PPA1               | Inorganic pyrophosphatase                                                                                   | 4,83 | 5,07 | 4,82 | 1,76 | 0,98 | 0,56 | 0,0852 | 0,9550 | 0,1630 | 0,2248 | 0,5610 | 0,3626 |
| CYB5B              | Cytochrome b5 type B                                                                                        | 4,52 | 4,71 | 4,73 | 1,53 | 1,62 | 1,06 | 0,0968 | 0,0858 | 0,7309 | 0,2248 | 0,2498 | 0,5823 |
| TUFM               | Elongation factor Tu, mitochondrial                                                                         | 5,29 | 5,21 | 5,25 | 0,83 | 0,91 | 1,10 | 0,1417 | 0,0861 | 0,4298 | 0,2397 | 0,2498 | 0,4615 |
| ETF1               | Eukaryotic peptide chain release factor subunit 1                                                           | 4,19 | 4,15 | 4,24 | 0,92 | 1,12 | 1,22 | 0,7441 | 0,6761 | 0,0867 | 0,4295 | 0,5151 | 0,3018 |
| ANXA6              | Annexin A6;Annexin                                                                                          | 5,61 | 5,37 | 5,81 | 0,58 | 1,59 | 2,73 | 0,2505 | 0,1479 | 0,0887 | 0,2872 | 0,2924 | 0,3067 |
| CALM2;CALM1;CALM3  | Calmodulin                                                                                                  | 4,84 | 5,44 | 5,14 | 3,93 | 1,97 | 0,50 | 0,0888 | 0,3741 | 0,2427 | 0,2248 | 0,4214 | 0,3949 |
| DLD                | Dihydropolpyl dehydrogenase, mitochondrial                                                                  | 4,58 | 4,29 | 4,55 | 0,51 | 0,94 | 1,84 | 0,0904 | 0,8123 | 0,1621 | 0,2248 | 0,5333 | 0,3626 |
| UBB;RPS27A;UBC;UBA | Ubiquitin-60S ribosomal protein L40;Ubiquitin;60S ribosomal protein L40                                     | 5,44 | 5,64 | 5,50 | 1,61 | 1,15 | 0,71 | 0,0915 | 0,5203 | 0,2595 | 0,2248 | 0,4684 | 0,4124 |
| UCHL1              | Ubiquitin carboxyl-terminal hydrolase isozyme L1                                                            | 5,26 | 5,53 | 5,27 | 1,83 | 1,01 | 0,55 | 0,1700 | 0,9857 | 0,0922 | 0,2538 | 0,5712 | 0,3165 |
| ATP2A2             | Sarcoplasmic/endoplasmic reticulum calcium ATPase 2                                                         | 4,91 | 4,60 | 4,98 | 0,50 | 1,17 | 2,36 | 0,0925 | 0,7729 | 0,2252 | 0,2248 | 0,5305 | 0,3949 |
| ANP32A             | Acidic leucine-rich nuclear phosphoprotein 32 family member A                                               | 4,59 | 4,96 | 4,73 | 2,32 | 1,36 | 0,59 | 0,0926 | 0,6635 | 0,4553 | 0,2248 | 0,5112 | 0,4681 |
| HARS               | Histidine-tRNA ligase, cytoplasmic                                                                          | 4,46 | 4,34 | 4,42 | 0,77 | 0,92 | 1,19 | 0,0928 | 0,7400 | 0,4994 | 0,2248 | 0,5259 | 0,4781 |
| CAPRIN1            | Caprin-1                                                                                                    | 4,23 | 4,03 | 4,10 | 0,63 | 0,74 | 1,17 | 0,0931 | 0,2494 | 0,5634 | 0,2248 | 0,3694 | 0,5059 |
| EIF2S1             | Eukaryotic translation initiation factor 2 subunit 1                                                        | 4,22 | 4,06 | 4,12 | 0,70 | 0,79 | 1,14 | 0,1029 | 0,0934 | 0,4347 | 0,2253 | 0,2643 | 0,4621 |
| HADH               | Hydroxyacyl-coenzyme A dehydrogenase, mitochondrial                                                         | 4,65 | 4,80 | 4,86 | 1,42 | 1,62 | 1,15 | 0,0985 | 0,0934 | 0,5489 | 0,2248 | 0,2643 | 0,4987 |
| HADHA              | Trifunctional enzyme subunit alpha, mitochondrial;Long-chain enoyl-CoA hydratase/3-oxoacyl-CoA thioesterase | 5,19 | 4,93 | 5,29 | 0,54 | 1,24 | 2,28 | 0,1698 | 0,3831 | 0,0936 | 0,2538 | 0,4226 | 0,3180 |
| DBN1               | Drebrin                                                                                                     | 5,14 | 5,11 | 4,89 | 0,93 | 0,55 | 0,60 | 0,5912 | 0,0937 | 0,1318 | 0,3926 | 0,2643 | 0,3491 |
| ERGIC1             | Endoplasmic reticulum-Golgi intermediate compartment protein 1                                              | 4,23 | 4,37 | 4,32 | 1,39 | 1,24 | 0,89 | 0,0942 | 0,2418 | 0,3853 | 0,2248 | 0,3640 | 0,4454 |
| GARS               | Glycine-tRNA ligase                                                                                         | 4,73 | 4,60 | 4,71 | 0,73 | 0,96 | 1,31 | 0,0942 | 0,8400 | 0,1541 | 0,2248 | 0,5383 | 0,3622 |
| UFL1               | E3 UFM1-protein ligase 1                                                                                    | 3,74 | 3,68 | 3,88 | 0,86 | 1,39 | 1,62 | 0,5941 | 0,0948 | 0,1436 | 0,3926 | 0,2643 | 0,3531 |
| LRP1               | Prolow-density lipoprotein receptor-related protein 1;Low-density lipoprotein receptor-related protein 1    | 4,72 | 4,16 | 4,29 | 0,28 | 0,38 | 1,35 | 0,0952 | 0,2675 | 0,6960 | 0,2248 | 0,3828 | 0,5695 |
| PFKM               | ATP-dependent 6-phosphofructokinase, muscle type                                                            | 4,94 | 5,04 | 4,96 | 1,27 | 1,07 | 0,84 | 0,0953 | 0,8140 | 0,4889 | 0,2248 | 0,5333 | 0,4752 |
| LRPPRC             | Leucine-rich PPR motif-containing protein, mitochondrial                                                    | 4,91 | 4,10 | 4,65 | 0,15 | 0,55 | 3,59 | 0,0955 | 0,2603 | 0,2394 | 0,2248 | 0,3799 | 0,3949 |
| TNPO1              | Transportin-1                                                                                               | 4,57 | 4,55 | 4,49 | 0,97 | 0,84 | 0,87 | 0,9170 | 0,5975 | 0,0959 | 0,4751 | 0,4914 | 0,3210 |
| EEF1A1;EEF1A1P5    | Elongation factor 1-alpha 1;Putative elongation factor 1-alpha-like 3                                       | 6,04 | 6,06 | 6,16 | 1,05 | 1,30 | 1,25 | 0,6642 | 0,0960 | 0,1125 | 0,4084 | 0,2658 | 0,3354 |
| VTA1               | Vacuolar protein sorting-associated protein VTA1 homolog                                                    | 4,15 | 4,18 | 4,07 | 1,09 | 0,84 | 0,77 | 0,5830 | 0,3635 | 0,0961 | 0,3926 | 0,4200 | 0,3210 |
| ANXA2;ANXA2P2      | Annexin A2;Annexin;Putative annexin A2-like protein                                                         | 5,82 | 5,52 | 5,93 | 0,49 | 1,28 | 2,59 | 0,2719 | 0,5464 | 0,0979 | 0,3031 | 0,4701 | 0,3250 |
| SRSF3              | Serine/arginine-rich splicing factor 3                                                                      | 4,38 | 4,70 | 4,52 | 2,09 | 1,38 | 0,66 | 0,0989 | 0,3478 | 0,1601 | 0,2248 | 0,4150 | 0,3626 |
| ALDH2              | Aldehyde dehydrogenase, mitochondrial                                                                       | 4,90 | 4,84 | 4,70 | 0,86 | 0,63 | 0,73 | 0,4542 | 0,0995 | 0,1709 | 0,3581 | 0,2702 | 0,3685 |
| ALDH7A1            | Alpha-aminoadipic semialdehyde dehydrogenase                                                                | 4,91 | 4,95 | 5,04 | 1,09 | 1,34 | 1,24 | 0,5851 | 0,0995 | 0,2684 | 0,3926 | 0,2702 | 0,4146 |
| EIF4G2             | Eukaryotic translation initiation factor 4 gamma 2                                                          | 4,61 | 4,62 | 4,49 | 1,00 | 0,75 | 0,75 | 0,9812 | 0,1232 | 0,1004 | 0,4917 | 0,2810 | 0,3265 |
| CDC37              | Hsp90 co-chaperone Cdc37;Hsp90 co-chaperone Cdc37, N-terminally processed                                   | 4,45 | 4,48 | 4,37 | 1,07 | 0,83 | 0,78 | 0,7554 | 0,1006 | 0,2767 | 0,4331 | 0,2715 | 0,4183 |

|                      |                                                                         |      |      |      |      |      |      |        |        |        |        |        |        |
|----------------------|-------------------------------------------------------------------------|------|------|------|------|------|------|--------|--------|--------|--------|--------|--------|
| RAB5A                | Ras-related protein Rab-5A                                              | 4,64 | 4,75 | 4,63 | 1,30 | 0,99 | 0,76 | 0,2844 | 0,9535 | 0,1010 | 0,3078 | 0,5609 | 0,3265 |
| HSD17B4              | Peroxisomal multifunctional enzyme type 2;(3R)-hydroxyacyl-CoA dehyd    | 4,94 | 4,80 | 4,81 | 0,71 | 0,74 | 1,03 | 0,1013 | 0,3282 | 0,9112 | 0,2253 | 0,4137 | 0,6468 |
| ACBD3                | Golgi resident protein GCP60                                            | 3,63 | 3,46 | 3,65 | 0,69 | 1,06 | 1,54 | 0,1019 | 0,7995 | 0,1873 | 0,2253 | 0,5305 | 0,3790 |
| HIST1H4A             | Histone H4                                                              | 5,92 | 6,43 | 6,14 | 3,19 | 1,67 | 0,52 | 0,1024 | 0,1320 | 0,2812 | 0,2253 | 0,2810 | 0,4223 |
| MDH1                 | Malate dehydrogenase, cytoplasmic                                       | 5,02 | 5,26 | 5,05 | 1,71 | 1,06 | 0,62 | 0,1041 | 0,8958 | 1,71   | 0,1824 | 0,2253 | 0,5472 |
| RNF40                | E3 ubiquitin-protein ligase BRE1B                                       | 3,38 | 3,30 | 3,34 | 0,84 | 0,91 | 1,08 | 0,1048 | 0,4856 | 0,6056 | 0,2253 | 0,4608 | 0,5283 |
| FLNC                 | Filamin-C                                                               | 5,53 | 4,84 | 5,59 | 0,20 | 1,14 | 5,63 | 0,1048 | 0,8773 | 0,1843 | 0,2253 | 0,5472 | 0,3772 |
| ATP5B                | ATP synthase subunit beta, mitochondrial;ATP synthase subunit beta      | 6,15 | 6,04 | 6,07 | 0,76 | 0,83 | 1,09 | 0,1053 | 0,3608 | 0,6492 | 0,2253 | 0,4200 | 0,5480 |
| SERPINB6             | Serpin B6                                                               | 4,10 | 4,13 | 4,27 | 1,06 | 1,47 | 1,38 | 0,6513 | 0,1058 | 0,2024 | 0,4056 | 0,2771 | 0,3887 |
| ACADM                | Medium-chain specific acyl-CoA dehydrogenase, mitochondrial             | 4,01 | 4,03 | 4,21 | 1,03 | 1,56 | 1,51 | 0,9316 | 0,1060 | 0,3751 | 0,4786 | 0,2771 | 0,4438 |
| ALDH18A1             | Delta-1-pyrroline-5-carboxylate synthase;Glutamate 5-kinase;Gamma-gl    | 4,44 | 4,16 | 4,50 | 0,52 | 1,15 | 2,22 | 0,1063 | 0,7984 | 0,2428 | 0,2261 | 0,5305 | 0,3949 |
| ARHGDI1              | Rho GDP-dissociation inhibitor 1                                        | 4,78 | 4,97 | 4,90 | 1,56 | 1,32 | 0,85 | 0,1081 | 0,3871 | 0,4735 | 0,2265 | 0,4238 | 0,4736 |
| H1FX                 | Histone H1x                                                             | 4,54 | 5,09 | 4,62 | 3,52 | 1,18 | 0,34 | 0,1176 | 0,7739 | 0,1084 | 0,2301 | 0,5305 | 0,3354 |
| MYL12A;MYL12B;MYL12C | Myosin regulatory light chain 12A;Myosin regulatory light chain 12B;Myo | 4,25 | 4,39 | 4,53 | 1,39 | 1,91 | 1,38 | 0,2364 | 0,1085 | 0,4445 | 0,2853 | 0,2771 | 0,4665 |
| CDC2;CDK1            | Cyclin-dependent kinase 1                                               | 4,40 | 4,13 | 4,14 | 0,54 | 0,55 | 1,03 | 0,1088 | 0,1443 | 0,8928 | 0,2265 | 0,2911 | 0,6445 |
| DARS                 | Aspartate--tRNA ligase, cytoplasmic                                     | 4,83 | 4,92 | 4,98 | 1,23 | 1,41 | 1,15 | 0,1485 | 0,1095 | 0,3468 | 0,2425 | 0,2771 | 0,4358 |
| ADD1                 | Alpha-adducin                                                           | 4,78 | 4,57 | 4,60 | 0,62 | 0,65 | 1,05 | 0,1100 | 0,1453 | 0,8403 | 0,2272 | 0,2911 | 0,6234 |
| ARF4                 | ADP-ribosylation factor 4                                               | 4,26 | 4,45 | 4,62 | 1,52 | 2,26 | 1,49 | 0,2486 | 0,1107 | 0,4607 | 0,2872 | 0,2771 | 0,4681 |
| USP5                 | Ubiquitin carboxyl-terminal hydrolase 5                                 | 4,95 | 5,03 | 4,97 | 1,20 | 1,05 | 0,87 | 0,2726 | 0,7810 | 0,1109 | 0,3031 | 0,5305 | 0,3354 |
| GOT1                 | Aspartate aminotransferase, cytoplasmic                                 | 4,65 | 4,61 | 4,43 | 0,92 | 0,60 | 0,66 | 0,7794 | 0,1123 | 0,1438 | 0,4393 | 0,2780 | 0,3531 |
| SCARB2               | Lysosome membrane protein 2                                             | 4,81 | 4,58 | 4,62 | 0,59 | 0,65 | 1,09 | 0,1124 | 0,2632 | 0,8260 | 0,2283 | 0,3806 | 0,6188 |
| DDX5                 | Probable ATP-dependent RNA helicase DDX5                                | 4,96 | 4,87 | 4,82 | 0,82 | 0,73 | 0,89 | 0,2823 | 0,1286 | 0,1124 | 0,3074 | 0,2810 | 0,3354 |
| TARS                 | Threonine--tRNA ligase, cytoplasmic                                     | 4,44 | 4,18 | 4,48 | 0,55 | 1,09 | 1,99 | 0,1937 | 0,7846 | 0,1131 | 0,2681 | 0,5305 | 0,3354 |
| OTUB1                | Ubiquitin thioesterase OTUB1                                            | 4,47 | 4,65 | 4,52 | 1,52 | 1,13 | 0,74 | 0,1132 | 0,6158 | 0,2260 | 0,2283 | 0,4995 | 0,3949 |
| CCT2                 | T-complex protein 1 subunit beta                                        | 5,51 | 5,55 | 5,50 | 1,08 | 0,96 | 0,89 | 0,5384 | 0,7197 | 0,1137 | 0,3795 | 0,5213 | 0,3354 |
| CRMP1                | Dihydropyrimidinase-related protein 1                                   | 6,15 | 6,21 | 5,51 | 1,17 | 0,23 | 0,20 | 0,4238 | 0,1483 | 0,1139 | 0,3492 | 0,2924 | 0,3354 |
| G3BP2                | Ras GTPase-activating protein-binding protein 2                         | 4,22 | 4,15 | 4,03 | 0,85 | 0,64 | 0,76 | 0,3999 | 0,1143 | 0,2367 | 0,3425 | 0,2792 | 0,3949 |
| ERLIN2               | Erlin-2                                                                 | 4,85 | 4,64 | 4,85 | 0,60 | 0,99 | 1,63 | 0,1144 | 0,9353 | 0,1718 | 0,2283 | 0,5568 | 0,3685 |
| MARCKS               | Myristoylated alanine-rich C-kinase substrate                           | 4,75 | 4,52 | 4,29 | 0,60 | 0,35 | 0,58 | 0,2228 | 0,1147 | 0,2783 | 0,2791 | 0,2792 | 0,4192 |
| NPM1                 | Nucleophosmin                                                           | 5,38 | 5,33 | 5,42 | 0,90 | 1,11 | 1,23 | 0,5473 | 0,5414 | 0,1151 | 0,3806 | 0,4701 | 0,3354 |
| SCRN1                | Secernin-1                                                              | 4,81 | 4,96 | 4,65 | 1,41 | 0,69 | 0,49 | 0,2194 | 0,3512 | 0,1154 | 0,2791 | 0,4156 | 0,3354 |
| HIST2H2BE;HIST1H2BE  | Histone H2B type 2-E;Histone H2B type 1-B;Histone H2B type 1-O;Hist     | 4,90 | 5,35 | 4,91 | 2,81 | 1,02 | 0,36 | 0,1163 | 0,9747 | 0,2295 | 0,2299 | 0,5664 | 0,3949 |
| ATP5A1               | ATP synthase subunit alpha, mitochondrial                               | 6,07 | 5,94 | 5,98 | 0,73 | 0,81 | 1,11 | 0,1183 | 0,3276 | 0,6210 | 0,2301 | 0,4137 | 0,5370 |
| PSME2                | Proteasome activator complex subunit 2                                  | 3,96 | 4,30 | 4,53 | 2,20 | 3,67 | 1,67 | 0,2297 | 0,1185 | 0,4284 | 0,2816 | 0,2810 | 0,4615 |
| SPTBN1               | Spectrin beta chain, non-erythrocytic 1                                 | 5,65 | 4,99 | 5,54 | 0,22 | 0,77 | 3,56 | 0,1298 | 0,1190 | 0,1930 | 0,2363 | 0,2810 | 0,3828 |
| PSMA7;PSMA8          | Proteasome subunit alpha type-7;Proteasome subunit alpha type-7-like    | 4,61 | 4,82 | 4,70 | 1,60 | 1,22 | 0,76 | 0,1199 | 0,4925 | 0,2242 | 0,2314 | 0,4608 | 0,3949 |
| AP2A2                | AP-2 complex subunit alpha-2                                            | 4,83 | 4,68 | 4,67 | 0,72 | 0,71 | 0,98 | 0,3257 | 0,1199 | 0,9528 | 0,3185 | 0,2810 | 0,6568 |
| SLC25A5              | ADP/ATP translocase 2;ADP/ATP translocase 2, N-terminally processed     | 5,07 | 5,11 | 5,24 | 1,10 | 1,49 | 1,35 | 0,2917 | 0,1201 | 0,1811 | 0,3115 | 0,2810 | 0,3754 |
| CCT6A                | T-complex protein 1 subunit zeta                                        | 5,47 | 5,47 | 5,41 | 1,00 | 0,88 | 0,88 | 0,9741 | 0,3194 | 0,1209 | 0,4917 | 0,4137 | 0,3392 |
| HNRNPA3              | Heterogeneous nuclear ribonucleoprotein A3                              | 5,33 | 5,36 | 5,25 | 1,07 | 0,84 | 0,78 | 0,5915 | 0,1794 | 0,1212 | 0,3926 | 0,3070 | 0,3392 |
| PAFAH1B1             | Platelet-activating factor acetylhydrolase IB subunit alpha             | 4,72 | 4,77 | 4,50 | 1,12 | 0,60 | 0,53 | 0,5594 | 0,2317 | 0,1212 | 0,3838 | 0,3570 | 0,3392 |
| PAICS                | Multifunctional protein ADE2;Phosphoribosylaminoimidazole-succinocar    | 4,89 | 5,00 | 4,67 | 1,27 | 0,59 | 0,47 | 0,3512 | 0,2066 | 0,1220 | 0,3239 | 0,3352 | 0,3392 |
| SFPQ                 | Splicing factor, proline- and glutamine-rich                            | 5,40 | 5,34 | 5,30 | 0,87 | 0,81 | 0,93 | 0,1405 | 0,1229 | 0,4169 | 0,2397 | 0,2810 | 0,4581 |
| RPL13                | 60S ribosomal protein L13                                               | 4,67 | 4,79 | 4,88 | 1,33 | 1,63 | 1,23 | 0,3330 | 0,1230 | 0,2664 | 0,3221 | 0,2810 | 0,4135 |
| APMAP                | Adipocyte plasma membrane-associated protein                            | 4,86 | 4,67 | 4,53 | 0,64 | 0,47 | 0,73 | 0,2505 | 0,1248 | 0,3949 | 0,2872 | 0,2810 | 0,4479 |
| LDHB                 | L-lactate dehydrogenase B chain;L-lactate dehydrogenase                 | 5,70 | 5,93 | 5,79 | 1,71 | 1,24 | 0,72 | 0,1251 | 0,5549 | 0,3038 | 0,2357 | 0,4701 | 0,4247 |
| ASAH1                | Acid ceramidase;Acid ceramidase subunit alpha;Acid ceramidase subunit   | 4,55 | 4,37 | 4,41 | 0,66 | 0,72 | 1,09 | 0,3622 | 0,1251 | 0,8266 | 0,3280 | 0,2810 | 0,6188 |
| PSMA3                | Proteasome subunit alpha type-3                                         | 4,18 | 4,54 | 4,29 | 2,32 | 1,29 | 0,56 | 0,1254 | 0,5797 | 0,1972 | 0,2357 | 0,4824 | 0,3859 |
| HNRNPK               | Heterogeneous nuclear ribonucleoprotein K                               | 5,88 | 5,97 | 5,85 | 1,24 | 0,94 | 0,76 | 0,3341 | 0,7664 | 0,1262 | 0,3221 | 0,5296 | 0,3411 |
| LAMP1                | Lysosome-associated membrane glycoprotein 1                             | 4,92 | 4,49 | 4,85 | 0,37 | 0,84 | 2,27 | 0,1263 | 0,3824 | 0,1667 | 0,2357 | 0,4226 | 0,3654 |
| FXR1                 | Fragile X mental retardation syndrome-related protein 1                 | 4,15 | 4,04 | 4,23 | 0,78 | 1,20 | 1,54 | 0,1288 | 0,7560 | 0,4766 | 0,2363 | 0,5288 | 0,4746 |
| CYFIP2               | Cytoplasmic FMR1-interacting protein 2                                  | 4,79 | 4,62 | 4,46 | 0,68 | 0,47 | 0,69 | 0,2148 | 0,1301 | 0,4472 | 0,2791 | 0,2810 | 0,4665 |
| AHSA1                | Activator of 90 kDa heat shock protein ATPase homolog 1                 | 4,48 | 4,43 | 4,23 | 0,89 | 0,56 | 0,63 | 0,5353 | 0,1302 | 0,1931 | 0,3789 | 0,2810 | 0,3828 |
| ETFA                 | Electron transfer flavoprotein subunit alpha, mitochondrial             | 4,37 | 4,54 | 4,58 | 1,46 | 1,60 | 1,10 | 0,2195 | 0,1304 | 0,6071 | 0,2791 | 0,2810 | 0,5287 |
| AHCY                 | Adenosylhomocysteinase                                                  | 5,13 | 5,08 | 5,16 | 0,90 | 1,09 | 1,21 | 0,4750 | 0,5559 | 0,1312 | 0,3631 | 0,4701 | 0,3491 |
| RPLP2                | 60S acidic ribosomal protein P2                                         | 4,29 | 4,73 | 4,60 | 2,74 | 2,04 | 0,74 | 0,1473 | 0,1320 | 0,5936 | 0,2425 | 0,2810 | 0,5215 |
| UGGT1                | UDP-glucose:glycoprotein glucosyltransferase 1                          | 4,86 | 4,52 | 4,61 | 0,45 | 0,56 | 1,24 | 0,2211 | 0,1327 | 0,7099 | 0,2791 | 0,2810 | 0,5715 |

|                    |                                                                           |      |      |      |      |      |      |        |        |        |        |        |        |
|--------------------|---------------------------------------------------------------------------|------|------|------|------|------|------|--------|--------|--------|--------|--------|--------|
| AKAP12             | A-kinase anchor protein 12                                                | 4,37 | 3,84 | 3,85 | 0,30 | 0,31 | 1,04 | 0,1560 | 0,1343 | 0,9530 | 0,2459 | 0,2815 | 0,6568 |
| TFR3               | Transferrin receptor protein 1;Transferrin receptor protein 1, serum form | 3,97 | 4,12 | 4,02 | 1,40 | 1,12 | 0,80 | 0,1354 | 0,6662 | 0,3547 | 0,2397 | 0,5121 | 0,4375 |
| PSMA1              | Proteasome subunit alpha type-1;Proteasome subunit alpha type             | 4,37 | 4,59 | 4,49 | 1,65 | 1,33 | 0,81 | 0,1356 | 0,4913 | 0,5404 | 0,2397 | 0,4608 | 0,4970 |
| G6PD               | Glucose-6-phosphate 1-dehydrogenase                                       | 4,38 | 4,18 | 4,09 | 0,64 | 0,51 | 0,81 | 0,1358 | 0,2753 | 0,7080 | 0,2397 | 0,3887 | 0,5715 |
| FABP5              | Fatty acid-binding protein, epidermal                                     | 4,25 | 4,64 | 4,31 | 2,45 | 1,14 | 0,46 | 0,1359 | 0,7905 | 0,2228 | 0,2397 | 0,5305 | 0,3949 |
| RPS17L;RPS17       | 40S ribosomal protein S17-like;40S ribosomal protein S17                  | 4,50 | 4,73 | 4,71 | 1,69 | 1,60 | 0,95 | 0,1366 | 0,1433 | 0,8647 | 0,2397 | 0,2908 | 0,6363 |
| XPNPEP1            | Xaa-Pro aminopeptidase 1                                                  | 4,33 | 4,39 | 4,27 | 1,15 | 0,88 | 0,76 | 0,5865 | 0,6155 | 0,1366 | 0,3926 | 0,4995 | 0,3512 |
| TOP1               | DNA topoisomerase 1                                                       | 4,40 | 4,25 | 4,31 | 0,70 | 0,81 | 1,16 | 0,1382 | 0,1820 | 0,4619 | 0,2397 | 0,3071 | 0,4681 |
| ERP29              | Endoplasmic reticulum resident protein 29                                 | 4,51 | 4,58 | 4,65 | 1,18 | 1,39 | 1,19 | 0,3218 | 0,1384 | 0,3402 | 0,3185 | 0,2881 | 0,4358 |
| CLIP2              | CAP-Gly domain-containing linker protein 2                                | 4,20 | 4,28 | 4,04 | 1,20 | 0,69 | 0,58 | 0,6266 | 0,4436 | 0,1390 | 0,3982 | 0,4464 | 0,3520 |
| IQGAP1             | Ras GTPase-activating-like protein IQGAP1                                 | 4,74 | 4,32 | 4,95 | 0,38 | 1,64 | 4,30 | 0,3423 | 0,4469 | 0,1398 | 0,3236 | 0,4486 | 0,3520 |
| CPNE3              | Copine-3                                                                  | 4,26 | 4,34 | 4,32 | 1,20 | 1,14 | 0,94 | 0,1407 | 0,2424 | 0,6752 | 0,2397 | 0,3640 | 0,5592 |
| PLEC               | Plectin                                                                   | 5,65 | 4,61 | 5,44 | 0,09 | 0,62 | 6,68 | 0,1410 | 0,1435 | 0,2179 | 0,2397 | 0,2908 | 0,3949 |
| ST13;ST13P5;ST13P4 | Hsc70-interacting protein;Putative protein FAM10A5;Putative protein FA    | 4,94 | 5,03 | 4,96 | 1,24 | 1,05 | 0,85 | 0,1415 | 0,7406 | 0,3032 | 0,2397 | 0,5259 | 0,4247 |
| SRSF7              | Serine/arginine-rich splicing factor 7                                    | 4,59 | 4,77 | 4,58 | 1,51 | 0,96 | 0,64 | 0,2262 | 0,8472 | 0,1415 | 0,2815 | 0,5393 | 0,3531 |
| USP9X              | Probable ubiquitin carboxyl-terminal hydrolase FAF-X                      | 4,07 | 3,87 | 4,02 | 0,62 | 0,89 | 1,42 | 0,1930 | 0,7424 | 0,1417 | 0,2681 | 0,5259 | 0,3531 |
| LAMP2              | Lysosome-associated membrane glycoprotein 2                               | 4,66 | 4,33 | 4,59 | 0,47 | 0,85 | 1,83 | 0,1426 | 0,4578 | 0,2034 | 0,2397 | 0,4491 | 0,3887 |
| RAB5B              | Ras-related protein Rab-5B                                                | 4,06 | 4,13 | 4,19 | 1,17 | 1,34 | 1,15 | 0,4312 | 0,1685 | 0,1434 | 0,3505 | 0,3037 | 0,3531 |
| NPTN;DKFZp566H1924 | Neuroplastin                                                              | 4,57 | 5,08 | 4,56 | 3,25 | 0,98 | 0,30 | 0,1545 | 0,9615 | 0,1460 | 0,2451 | 0,5625 | 0,3554 |
| STIP1              | Stress-induced-phosphoprotein 1                                           | 4,93 | 4,99 | 4,89 | 1,14 | 0,90 | 0,79 | 0,4005 | 0,4104 | 0,1482 | 0,3425 | 0,4346 | 0,3570 |
| OLA1               | Obg-like ATPase 1                                                         | 4,81 | 4,94 | 4,78 | 1,34 | 0,93 | 0,70 | 0,1780 | 0,7627 | 0,1485 | 0,2584 | 0,5288 | 0,3570 |
| DPYSL3             | Dihydropyrimidinase-related protein 3                                     | 6,16 | 6,20 | 5,64 | 1,10 | 0,30 | 0,27 | 0,5430 | 0,1782 | 0,1501 | 0,3801 | 0,3070 | 0,3579 |
| ESD                | S-formylglutathione hydrolase                                             | 4,34 | 4,51 | 4,47 | 1,45 | 1,34 | 0,92 | 0,1502 | 0,3625 | 0,7276 | 0,2432 | 0,4200 | 0,5810 |
| MAP2               | Microtubule-associated protein 2                                          | 5,47 | 5,43 | 4,63 | 0,91 | 0,14 | 0,16 | 0,7728 | 0,1518 | 0,1639 | 0,4369 | 0,2943 | 0,3626 |
| FTO                | Alpha-ketoglutarate-dependent dioxygenase FTO                             | 3,94 | 4,01 | 4,03 | 1,17 | 1,24 | 1,07 | 0,4761 | 0,1525 | 0,7477 | 0,3631 | 0,2943 | 0,5860 |
| UBR4               | E3 ubiquitin-protein ligase UBR4                                          | 4,19 | 4,28 | 4,21 | 1,24 | 1,04 | 0,84 | 0,4532 | 0,8885 | 0,1531 | 0,3581 | 0,5472 | 0,3622 |
| COPB2              | Coatamer subunit beta                                                     | 4,47 | 4,22 | 4,41 | 0,56 | 0,88 | 1,56 | 0,1538 | 0,7716 | 0,1933 | 0,2451 | 0,5305 | 0,3828 |
| HMGCS1             | Hydroxymethylglutaryl-CoA synthase, cytoplasmic                           | 4,99 | 5,18 | 4,82 | 1,52 | 0,67 | 0,44 | 0,3758 | 0,5523 | 0,1538 | 0,3328 | 0,4701 | 0,3622 |
| CTNNA2             | Catenin alpha-2                                                           | 5,00 | 4,85 | 4,55 | 0,71 | 0,36 | 0,50 | 0,3448 | 0,1545 | 0,3470 | 0,3239 | 0,2956 | 0,4358 |
| AIFM1              | Apoptosis-inducing factor 1, mitochondrial                                | 4,04 | 3,80 | 3,98 | 0,57 | 0,87 | 1,53 | 0,1548 | 0,5599 | 0,2400 | 0,2451 | 0,4712 | 0,3949 |
| LMNB1              | Lamin-B1                                                                  | 5,43 | 5,49 | 5,26 | 1,16 | 0,67 | 0,58 | 0,4935 | 0,2583 | 0,1558 | 0,3669 | 0,3787 | 0,3626 |
| GDI2               | Rab GDP dissociation inhibitor beta                                       | 5,79 | 5,87 | 5,67 | 1,19 | 0,75 | 0,63 | 0,1636 | 0,3750 | 0,1559 | 0,2514 | 0,4214 | 0,3626 |
| ATIC               | Bifunctional purine biosynthesis protein PURH;Phosphoribosylaminoimid     | 4,63 | 4,54 | 4,71 | 0,83 | 1,22 | 1,47 | 0,5970 | 0,1563 | 0,3131 | 0,3926 | 0,2960 | 0,4271 |
| DLST               | Dihydropolyllysine-residue succinyltransferase component of 2-oxogluta    | 4,80 | 4,66 | 4,65 | 0,72 | 0,71 | 0,98 | 0,1684 | 0,1565 | 0,9258 | 0,2538 | 0,2960 | 0,6542 |
| PLRG1              | Pleiotropic regulator 1                                                   | 3,50 | 3,44 | 3,42 | 0,86 | 0,83 | 0,96 | 0,1566 | 0,3403 | 0,8297 | 0,2459 | 0,4142 | 0,6193 |
| AP2M1              | AP-2 complex subunit mu                                                   | 4,35 | 4,50 | 4,30 | 1,39 | 0,89 | 0,64 | 0,3782 | 0,7850 | 0,1579 | 0,3328 | 0,5305 | 0,3626 |
| WDR1               | WD repeat-containing protein 1                                            | 5,02 | 4,95 | 4,90 | 0,86 | 0,77 | 0,89 | 0,4399 | 0,1596 | 0,4412 | 0,3524 | 0,2982 | 0,4665 |
| U2AF2              | Splicing factor U2AF 65 kDa subunit                                       | 4,79 | 4,83 | 4,64 | 1,10 | 0,72 | 0,66 | 0,8056 | 0,1598 | 0,2724 | 0,4460 | 0,2982 | 0,4181 |
| H2AFV;H2AFZ        | Histone H2A.V;Histone H2A.Z;Histone H2A                                   | 4,43 | 4,80 | 4,61 | 2,36 | 1,52 | 0,64 | 0,1617 | 0,2460 | 0,4454 | 0,2506 | 0,3682 | 0,4665 |
| DPYSL2             | Dihydropyrimidinase-related protein 2                                     | 6,16 | 6,15 | 5,68 | 0,99 | 0,34 | 0,34 | 0,9423 | 0,1624 | 0,1632 | 0,4825 | 0,3018 | 0,3626 |
| ACLY               | ATP-citrate synthase                                                      | 4,84 | 4,71 | 4,92 | 0,74 | 1,19 | 1,59 | 0,4813 | 0,6567 | 0,1633 | 0,3631 | 0,5104 | 0,3626 |
| IGF2BP1            | Insulin-like growth factor 2 mRNA-binding protein 1                       | 4,85 | 4,71 | 4,48 | 0,71 | 0,43 | 0,60 | 0,6031 | 0,1662 | 0,4287 | 0,3926 | 0,3027 | 0,4615 |
| RUVBL1             | RuvB-like 1                                                               | 4,77 | 4,86 | 4,83 | 1,23 | 1,15 | 0,94 | 0,1667 | 0,3229 | 0,3479 | 0,2538 | 0,4137 | 0,4359 |
| VCP                | Transitional endoplasmic reticulum ATPase                                 | 5,57 | 5,57 | 5,53 | 0,98 | 0,90 | 0,91 | 0,8750 | 0,3391 | 0,1693 | 0,4666 | 0,4142 | 0,3685 |
| DDAH2              | N(G),N(G)-dimethylarginine dimethylaminohydrolase 2                       | 4,66 | 4,96 | 4,50 | 1,99 | 0,68 | 0,34 | 0,1707 | 0,6014 | 0,1809 | 0,2538 | 0,4937 | 0,3754 |
| DNAJB11            | DnaJ homolog subfamily B member 11                                        | 4,25 | 4,22 | 4,41 | 0,93 | 1,42 | 1,52 | 0,8468 | 0,3651 | 0,1717 | 0,4582 | 0,4200 | 0,3685 |
| RPS16              | 40S ribosomal protein S16                                                 | 4,53 | 4,70 | 4,76 | 1,47 | 1,66 | 1,13 | 0,3365 | 0,1720 | 0,7771 | 0,3221 | 0,3057 | 0,5991 |
| HNRNPA1;HNRNPA1L2  | Heterogeneous nuclear ribonucleoprotein A1;Heterogeneous nuclear rib      | 5,66 | 5,66 | 5,56 | 1,00 | 0,79 | 0,79 | 0,9791 | 0,1725 | 0,2063 | 0,4917 | 0,3057 | 0,3927 |
| ENAH               | Protein enabled homolog                                                   | 3,68 | 3,27 | 3,26 | 0,39 | 0,38 | 0,98 | 0,1749 | 0,1753 | 0,9674 | 0,2560 | 0,3070 | 0,6595 |
| PDHA1              | Pyruvate dehydrogenase E1 component subunit alpha, somatic form, mi       | 4,69 | 4,31 | 4,55 | 0,42 | 0,74 | 1,77 | 0,1749 | 0,5099 | 0,2894 | 0,2560 | 0,4675 | 0,4247 |
| C10BP              | Complement component 1 Q subcomponent-binding protein, mitochond          | 4,34 | 4,38 | 4,60 | 1,10 | 1,82 | 1,66 | 0,6287 | 0,1510 | 0,2180 | 0,3986 | 0,3070 | 0,3949 |
| DCLK1              | Serine/threonine-protein kinase DCLK1                                     | 5,34 | 5,23 | 4,98 | 0,77 | 0,44 | 0,57 | 0,1761 | 0,1816 | 0,3464 | 0,2566 | 0,3071 | 0,4358 |
| LRRC47             | Leucine-rich repeat-containing protein 47                                 | 4,55 | 4,54 | 4,43 | 0,96 | 0,75 | 0,78 | 0,8478 | 0,1763 | 0,1972 | 0,4582 | 0,3070 | 0,3859 |
| PDHB               | Pyruvate dehydrogenase E1 component subunit beta, mitochondrial           | 4,73 | 4,70 | 4,82 | 0,93 | 1,23 | 1,31 | 0,7621 | 0,4193 | 0,1765 | 0,4346 | 0,4365 | 0,3720 |
| DPYSL5             | Dihydropyrimidinase-related protein 5                                     | 5,66 | 5,63 | 4,84 | 0,92 | 0,15 | 0,16 | 0,7258 | 0,1769 | 0,1924 | 0,4291 | 0,3070 | 0,3828 |
| MAP1A              | Microtubule-associated protein 1A;MAP1A heavy chain;MAP1 light chain      | 4,15 | 3,98 | 3,99 | 0,68 | 0,69 | 1,01 | 0,2421 | 0,1791 | 0,9612 | 0,2853 | 0,3070 | 0,6584 |
| MUT                | Methylmalonyl-CoA mutase, mitochondrial                                   | 4,12 | 4,09 | 4,19 | 0,94 | 1,16 | 1,23 | 0,6826 | 0,4310 | 0,1800 | 0,4147 | 0,4405 | 0,3754 |



|               |                                                                        |      |      |      |      |      |      |        |        |        |        |        |        |
|---------------|------------------------------------------------------------------------|------|------|------|------|------|------|--------|--------|--------|--------|--------|--------|
| NES           | Nestin                                                                 | 5,83 | 5,62 | 5,76 | 0,62 | 0,84 | 1,36 | 0,1814 | 0,5560 | 0,3735 | 0,2587 | 0,4701 | 0,4438 |
| HSPA9         | Stress-70 protein, mitochondrial                                       | 5,36 | 5,27 | 5,39 | 0,81 | 1,07 | 1,33 | 0,1818 | 0,7240 | 0,2173 | 0,2587 | 0,5225 | 0,3949 |
| ANP32E        | Acidic leucine-rich nuclear phosphoprotein 32 family member E          | 4,26 | 4,49 | 4,40 | 1,73 | 1,39 | 0,80 | 0,1824 | 0,1904 | 0,5460 | 0,2587 | 0,3163 | 0,4987 |
| GLB1          | Beta-galactosidase                                                     | 4,46 | 4,09 | 4,26 | 0,43 | 0,64 | 1,47 | 0,1825 | 0,2782 | 0,3997 | 0,2587 | 0,3891 | 0,4487 |
| HNRNPA2B1     | Heterogeneous nuclear ribonucleoproteins A2/B1                         | 5,74 | 5,84 | 5,69 | 1,26 | 0,90 | 0,72 | 0,3474 | 0,7203 | 0,1828 | 0,3239 | 0,5213 | 0,3757 |
| PDS5B         | Sister chromatid cohesion protein PDS5 homolog B                       | 4,08 | 4,11 | 4,16 | 1,07 | 1,21 | 1,13 | 0,6588 | 0,1830 | 0,3420 | 0,4078 | 0,3076 | 0,4358 |
| ME2           | NAD-dependent malic enzyme, mitochondrial                              | 4,54 | 4,36 | 4,30 | 0,67 | 0,58 | 0,86 | 0,3142 | 0,1850 | 0,4915 | 0,3185 | 0,3085 | 0,4752 |
| IARS          | Isoleucine--tRNA ligase, cytoplasmic                                   | 4,43 | 4,29 | 4,73 | 0,73 | 2,00 | 2,74 | 0,2478 | 0,3389 | 0,1860 | 0,2872 | 0,4142 | 0,3790 |
| CCT4          | T-complex protein 1 subunit delta                                      | 5,34 | 5,39 | 5,34 | 1,11 | 1,00 | 0,90 | 0,4187 | 0,9881 | 0,1875 | 0,3481 | 0,5713 | 0,3790 |
| DDAH1         | N(G),N(G)-dimethylarginine dimethylaminohydrolase 1                    | 5,00 | 5,18 | 4,70 | 1,55 | 0,51 | 0,33 | 0,1888 | 0,5268 | 0,3023 | 0,2656 | 0,4701 | 0,4247 |
| CHTOP         | Chromatin target of PRMT1 protein                                      | 3,78 | 3,85 | 3,78 | 1,17 | 0,99 | 0,84 | 0,1924 | 0,9692 | 0,4987 | 0,2681 | 0,5645 | 0,4781 |
| PGLS          | 6-phosphogluconolactonase                                              | 4,59 | 4,75 | 4,22 | 1,45 | 0,43 | 0,29 | 0,3422 | 0,3702 | 0,1925 | 0,3236 | 0,4203 | 0,3828 |
| NUDT21        | Cleavage and polyadenylation specificity factor subunit 5              | 4,27 | 4,68 | 4,53 | 2,58 | 1,85 | 0,72 | 0,1950 | 0,4052 | 0,5355 | 0,2681 | 0,4337 | 0,4934 |
| ENO2          | Gamma-enolase;Enolase                                                  | 5,26 | 5,52 | 4,47 | 1,83 | 0,16 | 0,09 | 0,2061 | 0,3218 | 0,1951 | 0,2750 | 0,4137 | 0,3848 |
| ACOT7         | Cytosolic acyl coenzyme A thioester hydrolase                          | 5,17 | 5,11 | 4,62 | 0,86 | 0,28 | 0,32 | 0,6178 | 0,1962 | 0,2396 | 0,3979 | 0,3234 | 0,3949 |
| EIF4E         | Eukaryotic translation initiation factor 4E                            | 3,93 | 4,07 | 4,00 | 1,39 | 1,17 | 0,84 | 0,1970 | 0,4963 | 0,2351 | 0,2688 | 0,4612 | 0,3949 |
| DDB1          | DNA damage-binding protein 1                                           | 4,58 | 4,53 | 4,71 | 0,89 | 1,34 | 1,51 | 0,7900 | 0,5521 | 0,1982 | 0,4412 | 0,4701 | 0,3863 |
| NAPA          | Alpha-soluble NSF attachment protein                                   | 4,28 | 4,48 | 4,46 | 1,59 | 1,53 | 0,96 | 0,2501 | 0,1986 | 0,8921 | 0,2872 | 0,3261 | 0,6445 |
| CS            | Citrate synthase;Citrate synthase, mitochondrial                       | 5,27 | 5,18 | 5,11 | 0,82 | 0,70 | 0,85 | 0,2913 | 0,1998 | 0,4837 | 0,3115 | 0,3267 | 0,4752 |
| EIF2S2        | Eukaryotic translation initiation factor 2 subunit 2                   | 3,99 | 3,96 | 4,15 | 0,93 | 1,43 | 1,54 | 0,8059 | 0,2690 | 0,2002 | 0,4460 | 0,3837 | 0,3886 |
| PSMC6         | 26S protease regulatory subunit 10B                                    | 4,68 | 4,82 | 4,77 | 1,38 | 1,23 | 0,89 | 0,2017 | 0,3299 | 0,3293 | 0,2722 | 0,4137 | 0,4345 |
| HNRNPA0       | Heterogeneous nuclear ribonucleoprotein A0                             | 4,88 | 5,02 | 4,80 | 1,39 | 0,84 | 0,60 | 0,2777 | 0,4964 | 0,2022 | 0,3069 | 0,4612 | 0,3887 |
| FUS           | RNA-binding protein FUS                                                | 4,86 | 4,77 | 4,73 | 0,81 | 0,74 | 0,92 | 0,2052 | 0,3311 | 0,7482 | 0,2750 | 0,4137 | 0,5860 |
| NUP155        | Nuclear pore complex protein Nup155                                    | 3,92 | 4,03 | 4,10 | 1,30 | 1,52 | 1,17 | 0,3594 | 0,2082 | 0,3625 | 0,3262 | 0,3353 | 0,4375 |
| PABPC1;PABPC3 | Polyadenylate-binding protein 1;Polyadenylate-binding protein 3        | 5,07 | 4,99 | 5,02 | 0,84 | 0,89 | 1,06 | 0,2089 | 0,4007 | 0,4272 | 0,2758 | 0,4318 | 0,4615 |
| TUBB2B        | Tubulin beta-2B chain                                                  | 5,05 | 4,95 | 4,53 | 0,79 | 0,30 | 0,38 | 0,5546 | 0,2099 | 0,2624 | 0,3835 | 0,3355 | 0,4131 |
| CAT           | Catalase                                                               | 4,06 | 3,70 | 3,86 | 0,43 | 0,62 | 1,43 | 0,2127 | 0,3778 | 0,3600 | 0,2791 | 0,4222 | 0,4375 |
| RTN3          | Reticulon-3                                                            | 4,56 | 4,58 | 4,27 | 1,03 | 0,51 | 0,49 | 0,7651 | 0,2310 | 0,2144 | 0,4346 | 0,3570 | 0,3949 |
| PSMB7         | Proteasome subunit beta type-7                                         | 4,37 | 4,52 | 4,42 | 1,40 | 1,10 | 0,79 | 0,2146 | 0,8003 | 0,4660 | 0,2791 | 0,5305 | 0,4699 |
| CAPZA1        | F-actin-capping protein subunit alpha-1                                | 4,79 | 4,89 | 4,78 | 1,27 | 0,98 | 0,77 | 0,2148 | 0,9467 | 0,4501 | 0,2791 | 0,5601 | 0,4681 |
| BZW1          | Basic leucine zipper and W2 domain-containing protein 1                | 4,37 | 4,33 | 4,48 | 0,91 | 1,27 | 1,40 | 0,5835 | 0,2783 | 0,2149 | 0,3926 | 0,3891 | 0,3949 |
|               | 02. Sep                                                                |      |      |      |      |      |      |        |        |        |        |        |        |
| ZNF512        | Zinc finger protein 512                                                | 5,07 | 5,11 | 5,07 | 1,11 | 0,99 | 0,90 | 0,2158 | 0,8702 | 0,2217 | 0,2791 | 0,5453 | 0,3949 |
| SF3A3         | Splicing factor 3A subunit 3                                           | 4,17 | 4,21 | 4,04 | 1,11 | 0,74 | 0,66 | 0,2587 | 0,3419 | 0,2172 | 0,3778 | 0,4142 | 0,3949 |
| ADK           | Adenosine kinase                                                       | 4,07 | 4,15 | 4,10 | 1,21 | 1,07 | 0,88 | 0,2172 | 0,6638 | 0,3070 | 0,2791 | 0,5112 | 0,4247 |
| BUB3          | Mitotic checkpoint protein BUB3                                        | 3,80 | 4,04 | 3,97 | 1,73 | 1,47 | 0,85 | 0,2173 | 0,3340 | 0,7651 | 0,2791 | 0,4142 | 0,5945 |
| RAD23B        | UV excision repair protein RAD23 homolog B                             | 4,06 | 4,29 | 4,27 | 1,68 | 1,63 | 0,97 | 0,2283 | 0,2191 | 0,9374 | 0,2816 | 0,3476 | 0,6561 |
| AGL           | Glycogen debranching enzyme;4-alpha-glucanotransferase;Amylo-alpha     | 4,21 | 4,12 | 4,09 | 0,81 | 0,75 | 0,93 | 0,4170 | 0,2200 | 0,7321 | 0,3481 | 0,3477 | 0,5823 |
| SEC31A        | Protein transport protein Sec31A                                       | 3,79 | 3,60 | 3,76 | 0,64 | 0,94 | 1,46 | 0,2216 | 0,8104 | 0,3025 | 0,2791 | 0,5333 | 0,4247 |
| PSIP1         | PC4 and SFRS1-interacting protein                                      | 4,22 | 4,11 | 4,36 | 0,79 | 1,39 | 1,77 | 0,2218 | 0,4144 | 0,2247 | 0,2791 | 0,4365 | 0,3949 |
| HIST1H1C      | Histone H1.2                                                           | 4,67 | 4,82 | 4,58 | 1,43 | 0,82 | 0,57 | 0,3887 | 0,6304 | 0,2245 | 0,3369 | 0,5020 | 0,3949 |
| TCP1          | T-complex protein 1 subunit alpha                                      | 5,36 | 5,51 | 5,30 | 1,41 | 0,88 | 0,63 | 0,3250 | 0,4499 | 0,2253 | 0,3185 | 0,4491 | 0,3949 |
| HIST1H1B      | Histone H1.5                                                           | 5,25 | 5,24 | 5,22 | 0,97 | 0,92 | 0,95 | 0,7484 | 0,2269 | 0,5251 | 0,4311 | 0,3545 | 0,4886 |
| PKM           | Pyruvate kinase PKM;Pyruvate kinase                                    | 4,94 | 5,18 | 5,13 | 1,72 | 1,55 | 0,90 | 0,3183 | 0,2273 | 0,7924 | 0,3185 | 0,3545 | 0,6052 |
| GPC4          | Glypican-4;Secreted glypican-4                                         | 5,90 | 5,94 | 5,96 | 1,10 | 1,16 | 1,05 | 0,3802 | 0,2273 | 0,7335 | 0,3335 | 0,3545 | 0,5823 |
| CBX3          | Chromobox protein homolog 3                                            | 4,33 | 4,03 | 3,91 | 0,51 | 0,38 | 0,75 | 0,3250 | 0,2276 | 0,4103 | 0,3185 | 0,3545 | 0,4542 |
| ASNA1         | ATPase ASNA1                                                           | 4,20 | 4,50 | 4,13 | 2,00 | 0,86 | 0,43 | 0,2446 | 0,7619 | 0,2281 | 0,2868 | 0,5288 | 0,3949 |
| RPN1          | Dolichyl-diphosphooligosaccharide--protein glycosyltransferase subunit | 4,53 | 4,59 | 4,53 | 1,16 | 1,02 | 0,88 | 0,2446 | 0,8983 | 0,2284 | 0,3505 | 0,5472 | 0,3949 |
| PYGL          | Glycogen phosphorylase, liver form;Phosphorylase                       | 5,26 | 5,15 | 5,27 | 0,78 | 1,03 | 1,33 | 0,2284 | 0,9057 | 0,2605 | 0,2816 | 0,5481 | 0,4124 |
| HNRNPD        | Heterogeneous nuclear ribonucleoprotein D0                             | 4,15 | 3,90 | 4,07 | 0,55 | 0,83 | 1,50 | 0,2302 | 0,6981 | 0,4774 | 0,2816 | 0,5201 | 0,4746 |
| ATP1A1        | Sodium/potassium-transporting ATPase subunit alpha-1                   | 5,31 | 5,39 | 5,24 | 1,21 | 0,85 | 0,71 | 0,4287 | 0,6153 | 0,2303 | 0,3505 | 0,4995 | 0,3949 |
| TKT           | Transketolase                                                          | 4,40 | 4,21 | 4,40 | 0,66 | 1,01 | 1,53 | 0,4854 | 0,9923 | 0,2313 | 0,3631 | 0,5726 | 0,3949 |
| ACAT1         | Acetyl-CoA acetyltransferase, mitochondrial                            | 5,49 | 5,55 | 5,45 | 1,15 | 0,92 | 0,80 | 0,2317 | 0,8303 | 0,5980 | 0,2816 | 0,5361 | 0,5244 |
| HNRNPAB       | Heterogeneous nuclear ribonucleoprotein A/B                            | 4,79 | 4,70 | 4,60 | 0,81 | 0,64 | 0,79 | 0,2327 | 0,5340 | 0,7339 | 0,2818 | 0,4701 | 0,5823 |
| MAPK1         | Mitogen-activated protein kinase 1                                     | 4,81 | 4,97 | 4,76 | 1,44 | 0,89 | 0,62 | 0,3151 | 0,7474 | 0,2334 | 0,3185 | 0,5268 | 0,3949 |
| CHD4          | Chromodomain-helicase-DNA-binding protein 4                            | 4,58 | 4,68 | 4,52 | 1,24 | 0,87 | 0,70 | 0,5216 | 0,7330 | 0,2363 | 0,3756 | 0,5245 | 0,3949 |
| AKR1B1        | Aldose reductase                                                       | 4,42 | 4,30 | 4,38 | 0,77 | 0,91 | 1,18 | 0,3280 | 0,7317 | 0,2371 | 0,3197 | 0,5245 | 0,3949 |
|               |                                                                        | 4,59 | 4,82 | 4,78 | 1,70 | 1,54 | 0,90 | 0,2383 | 0,2937 | 0,6160 | 0,2853 | 0,3972 | 0,5340 |

|                   |                                                                                |      |      |      |      |      |      |        |        |        |        |        |        |
|-------------------|--------------------------------------------------------------------------------|------|------|------|------|------|------|--------|--------|--------|--------|--------|--------|
| PSMC5             | 26S protease regulatory subunit 8                                              | 4,77 | 4,80 | 4,73 | 1,07 | 0,91 | 0,85 | 0,4673 | 0,4679 | 0,2390 | 0,3631 | 0,4546 | 0,3949 |
| SEC23A            | Protein transport protein Sec23A                                               | 4,19 | 4,19 | 4,31 | 1,00 | 1,32 | 1,33 | 0,9626 | 0,2714 | 0,2407 | 0,4884 | 0,3858 | 0,3949 |
| STAT1             | Signal transducer and activator of transcription 1-alpha/beta;Signal trans     | 3,86 | 3,67 | 4,26 | 0,64 | 2,47 | 3,86 | 0,2867 | 0,3798 | 0,2419 | 0,3093 | 0,4223 | 0,3949 |
| PSMC1             | 26S protease regulatory subunit 4                                              | 4,64 | 4,63 | 4,51 | 0,98 | 0,75 | 0,76 | 0,8879 | 0,2421 | 0,3065 | 0,4703 | 0,3640 | 0,4247 |
| ARPC2             | Actin-related protein 2/3 complex subunit 2                                    | 4,68 | 4,78 | 4,73 | 1,25 | 1,13 | 0,90 | 0,2472 | 0,2646 | 0,2547 | 0,2872 | 0,3808 | 0,4886 |
| SLC25A11          | Mitochondrial 2-oxoglutarate/malate carrier protein                            | 4,54 | 4,77 | 4,75 | 1,69 | 1,63 | 0,97 | 0,2480 | 0,3375 | 0,8963 | 0,2872 | 0,4142 | 0,6445 |
| HNRNPH1           | Heterogeneous nuclear ribonucleoprotein H;Heterogeneous nuclear rib            | 5,39 | 5,38 | 5,34 | 0,98 | 0,89 | 0,91 | 0,8587 | 0,2481 | 0,4596 | 0,4606 | 0,3691 | 0,4681 |
| ABHD10            | Mycophenolic acid acyl-glucuronide esterase, mitochondrial                     | 4,28 | 4,23 | 4,13 | 0,89 | 0,72 | 0,81 | 0,7093 | 0,2483 | 0,3897 | 0,4240 | 0,3691 | 0,4472 |
| SRSF1             | Serine/arginine-rich splicing factor 1                                         | 4,69 | 4,91 | 4,92 | 1,65 | 1,68 | 1,02 | 0,2822 | 0,2510 | 0,9084 | 0,3074 | 0,3705 | 0,6468 |
| PSMD11            | 26S proteasome non-ATPase regulatory subunit 11                                | 4,96 | 5,02 | 4,99 | 1,13 | 1,07 | 0,94 | 0,3733 | 0,6130 | 0,2517 | 0,3328 | 0,4995 | 0,4040 |
| LONP1             | Lon protease homolog, mitochondrial                                            | 4,42 | 4,32 | 4,44 | 0,79 | 1,06 | 1,34 | 0,2528 | 0,9018 | 0,4907 | 0,2884 | 0,5472 | 0,4752 |
| TRAP1             | Heat shock protein 75 kDa, mitochondrial                                       | 4,46 | 4,35 | 4,42 | 0,77 | 0,91 | 1,19 | 0,2531 | 0,5147 | 0,4977 | 0,2884 | 0,4680 | 0,4781 |
| FDPS              | Farnesyl pyrophosphate synthase                                                | 4,71 | 4,91 | 4,74 | 1,58 | 1,08 | 0,69 | 0,2598 | 0,8848 | 0,4339 | 0,2951 | 0,5472 | 0,4621 |
| TOMM40            | Mitochondrial import receptor subunit TOM40 homolog                            | 4,39 | 4,26 | 4,40 | 0,74 | 1,02 | 1,37 | 0,2612 | 0,9526 | 0,3364 | 0,2951 | 0,5609 | 0,4350 |
| SUCLG1            | Succinyl-CoA ligase [ADP/GDP-forming] subunit alpha, mitochondrial             | 4,06 | 4,03 | 4,11 | 0,92 | 1,10 | 1,20 | 0,6331 | 0,6367 | 0,2648 | 0,3993 | 0,5050 | 0,4135 |
| ATP6V1A           | V-type proton ATPase catalytic subunit A                                       | 4,94 | 4,99 | 4,34 | 1,10 | 0,25 | 0,22 | 0,7141 | 0,2945 | 0,2649 | 0,4254 | 0,3972 | 0,4135 |
| ATP5C1            | ATP synthase subunit gamma, mitochondrial                                      | 4,74 | 4,77 | 4,82 | 1,08 | 1,22 | 1,13 | 0,5576 | 0,2652 | 0,3008 | 0,3838 | 0,3808 | 0,4247 |
| ACAT2             | Acetyl-CoA acetyltransferase, cytosolic                                        | 4,92 | 4,99 | 4,57 | 1,18 | 0,45 | 0,38 | 0,5823 | 0,3282 | 0,2669 | 0,3926 | 0,4137 | 0,4135 |
| API5              | Apoptosis inhibitor 5                                                          | 4,45 | 4,58 | 4,47 | 1,34 | 1,04 | 0,77 | 0,2687 | 0,8925 | 0,4246 | 0,3015 | 0,5472 | 0,4615 |
| EPHX1             | Epoxide hydrolase 1                                                            | 4,75 | 4,48 | 4,60 | 0,54 | 0,72 | 1,33 | 0,2718 | 0,3452 | 0,4904 | 0,3031 | 0,4142 | 0,4752 |
| DCTN1             | Dynactin subunit 1                                                             | 4,80 | 4,79 | 4,61 | 0,97 | 0,65 | 0,66 | 0,8952 | 0,2842 | 0,2737 | 0,4703 | 0,3914 | 0,4183 |
| MTA1              | Metastasis-associated protein MTA1                                             | 3,66 | 3,70 | 3,82 | 1,08 | 1,44 | 1,33 | 0,8485 | 0,3872 | 0,2755 | 0,4582 | 0,4238 | 0,4183 |
| NDUFS2            | NADH dehydrogenase [ubiquinone] iron-sulfur protein 2, mitochondrial           | 4,45 | 4,35 | 4,46 | 0,80 | 1,02 | 1,28 | 0,5603 | 0,9565 | 0,2768 | 0,3838 | 0,5612 | 0,4183 |
| RPL27A            | 60S ribosomal protein L27a                                                     | 4,28 | 4,46 | 4,39 | 1,50 | 1,27 | 0,85 | 0,2792 | 0,2827 | 0,6403 | 0,3074 | 0,3914 | 0,5450 |
| ILF2              | Interleukin enhancer-binding factor 2                                          | 5,34 | 5,45 | 5,37 | 1,30 | 1,08 | 0,83 | 0,2934 | 0,7643 | 0,2825 | 0,3115 | 0,5290 | 0,4224 |
| PCBP2             | Poly(rC)-binding protein 2                                                     | 4,95 | 5,08 | 4,98 | 1,33 | 1,07 | 0,80 | 0,2829 | 0,7324 | 0,3184 | 0,3074 | 0,5245 | 0,4294 |
| COPS2             | COP9 signalosome complex subunit 2                                             | 4,11 | 4,13 | 4,07 | 1,04 | 0,91 | 0,88 | 0,6630 | 0,3445 | 0,2830 | 0,4084 | 0,4142 | 0,4224 |
| CCT5              | T-complex protein 1 subunit epsilon                                            | 5,35 | 5,31 | 5,30 | 0,91 | 0,89 | 0,97 | 0,4422 | 0,2831 | 0,6251 | 0,3524 | 0,3914 | 0,5393 |
| APEX1             | DNA-(apurinic or apyrimidinic site) lyase;DNA-(apurinic or apyrimidinic s      | 4,61 | 4,79 | 4,67 | 1,50 | 1,15 | 0,77 | 0,2832 | 0,6495 | 0,3893 | 0,3074 | 0,5095 | 0,4472 |
| HNRNPF            | Heterogeneous nuclear ribonucleoprotein F;Heterogeneous nuclear rib            | 4,58 | 4,58 | 4,62 | 1,01 | 1,10 | 1,10 | 0,9650 | 0,6283 | 0,2846 | 0,4889 | 0,5017 | 0,4235 |
| RBMX              | RNA-binding motif protein, X chromosome;RNA-binding motif protein, X           | 5,01 | 4,99 | 4,81 | 0,95 | 0,63 | 0,66 | 0,8006 | 0,2846 | 0,2898 | 0,4450 | 0,3914 | 0,4247 |
| EIF4A1            | Eukaryotic initiation factor 4A-I                                              | 5,55 | 5,58 | 5,61 | 1,06 | 1,15 | 1,09 | 0,5042 | 0,2858 | 0,4894 | 0,3703 | 0,3914 | 0,4752 |
| ALYREF            | THO complex subunit 4                                                          | 4,50 | 4,67 | 4,52 | 1,49 | 1,05 | 0,70 | 0,2880 | 0,9372 | 0,5743 | 0,3098 | 0,5568 | 0,5094 |
| PFN2              | Profilin;Profilin-2                                                            | 4,12 | 4,47 | 4,21 | 2,25 | 1,23 | 0,55 | 0,2927 | 0,7067 | 0,3585 | 0,3115 | 0,5201 | 0,4375 |
| NONO              | Non-POU domain-containing octamer-binding protein                              | 5,22 | 5,29 | 5,24 | 1,15 | 1,04 | 0,90 | 0,3850 | 0,8285 | 0,2937 | 0,3345 | 0,5361 | 0,4247 |
| KPNA3             | Importin subunit alpha-4                                                       | 4,06 | 4,19 | 4,12 | 1,35 | 1,16 | 0,85 | 0,2947 | 0,7049 | 0,5844 | 0,3115 | 0,5201 | 0,5171 |
| SYNM              | Synemin                                                                        | 4,63 | 4,02 | 4,17 | 0,24 | 0,35 | 1,42 | 0,2964 | 0,4215 | 0,6289 | 0,3116 | 0,4365 | 0,5399 |
| HNRNPC            | Heterogeneous nuclear ribonucleoproteins C1/C2                                 | 5,58 | 5,59 | 5,52 | 1,04 | 0,88 | 0,84 | 0,8315 | 0,4055 | 0,2975 | 0,4533 | 0,4337 | 0,4247 |
| SSB               | Lupus La protein                                                               | 4,68 | 4,64 | 4,72 | 0,92 | 1,10 | 1,20 | 0,5515 | 0,3539 | 0,2991 | 0,3821 | 0,4175 | 0,4247 |
| EIF3F             | Eukaryotic translation initiation factor 3 subunit F                           | 4,51 | 4,66 | 4,66 | 1,42 | 1,42 | 1,00 | 0,3123 | 0,3000 | 0,9814 | 0,3185 | 0,4021 | 0,6619 |
| ANXA1             | Annexin A1;Annexin                                                             | 5,13 | 4,71 | 5,22 | 0,38 | 1,22 | 3,21 | 0,3063 | 0,8164 | 0,3005 | 0,3183 | 0,5333 | 0,4247 |
| DDX39B            | Spliceosome RNA helicase DDX39B                                                | 5,41 | 5,49 | 5,48 | 1,18 | 1,15 | 0,98 | 0,3007 | 0,3407 | 0,8418 | 0,3152 | 0,4142 | 0,6236 |
| RPS25             | 40S ribosomal protein S25                                                      | 4,59 | 4,47 | 4,33 | 0,76 | 0,55 | 0,73 | 0,7070 | 0,3012 | 0,5463 | 0,4240 | 0,4024 | 0,4987 |
| NXN               | Nucleoredoxin                                                                  | 4,16 | 4,25 | 4,04 | 1,24 | 0,76 | 0,61 | 0,5457 | 0,3475 | 0,3014 | 0,3806 | 0,4150 | 0,4247 |
| PSMC2             | 26S protease regulatory subunit 7                                              | 4,63 | 4,71 | 4,57 | 1,21 | 0,88 | 0,73 | 0,3784 | 0,6289 | 0,3036 | 0,3328 | 0,5017 | 0,4247 |
| PCBP1             | Poly(rC)-binding protein 1                                                     | 4,67 | 4,75 | 4,53 | 1,19 | 0,71 | 0,60 | 0,4207 | 0,5095 | 0,3043 | 0,3481 | 0,4675 | 0,4247 |
| RRAGA;RRAGB       | Ras-related GTP-binding protein A;Ras-related GTP-binding protein B            | 3,65 | 3,63 | 3,72 | 0,96 | 1,19 | 1,24 | 0,9128 | 0,6833 | 0,3049 | 0,4741 | 0,5187 | 0,4247 |
| PCNA              | Proliferating cell nuclear antigen                                             | 4,21 | 4,18 | 4,26 | 0,93 | 1,10 | 1,19 | 0,7650 | 0,6539 | 0,3059 | 0,4346 | 0,5104 | 0,4247 |
| CNP               | 2,3-cyclic-nucleotide 3-phosphodiesterase                                      | 4,57 | 4,54 | 4,31 | 0,93 | 0,55 | 0,59 | 0,8551 | 0,3068 | 0,4066 | 0,4593 | 0,4074 | 0,4542 |
| MAT2A             | S-adenosylmethionine synthase isoform type-2                                   | 4,48 | 4,48 | 4,56 | 1,00 | 1,19 | 1,19 | 0,9910 | 0,3077 | 0,5262 | 0,4945 | 0,4074 | 0,4886 |
| TMPO              | Lamina-associated polypeptide 2, isoforms beta/gamma;Thymopoietin;T            | 4,91 | 4,96 | 4,84 | 1,12 | 0,84 | 0,75 | 0,6702 | 0,5433 | 0,3098 | 0,4104 | 0,4701 | 0,4253 |
| CCT3              | T-complex protein 1 subunit gamma                                              | 5,41 | 5,42 | 5,39 | 1,01 | 0,95 | 0,94 | 0,9315 | 0,6416 | 0,3100 | 0,4786 | 0,5066 | 0,4253 |
| ERP44             | Endoplasmic reticulum resident protein 44                                      | 4,33 | 4,24 | 4,24 | 0,81 | 0,83 | 1,01 | 0,3111 | 0,3110 | 0,8448 | 0,3185 | 0,4105 | 0,6239 |
| EIF4A3            | Eukaryotic initiation factor 4A-III;Eukaryotic initiation factor 4A-III, N-ter | 4,80 | 4,84 | 4,86 | 1,09 | 1,14 | 1,04 | 0,5614 | 0,3124 | 0,7087 | 0,3839 | 0,4110 | 0,5715 |
| PSME1             | Proteasome activator complex subunit 1                                         | 4,27 | 4,41 | 4,48 | 1,38 | 1,64 | 1,19 | 0,4007 | 0,3140 | 0,7377 | 0,3425 | 0,4115 | 0,5843 |
| MAP1LC3B;MAP1LC3A | Microtubule-associated proteins 1A/1B light chain 3B;Microtubule-assoc         | 4,19 | 3,92 | 4,11 | 0,54 | 0,83 | 1,54 | 0,3141 | 0,7206 | 0,5746 | 0,3185 | 0,5213 | 0,5094 |
| USO1              | General vesicular transport factor p115                                        | 4,15 | 4,04 | 4,15 | 0,77 | 1,00 | 1,29 | 0,4089 | 0,9980 | 0,3164 | 0,3458 | 0,5744 | 0,4294 |

|                |                                                                             |      |      |      |      |      |      |        |        |        |        |        |        |
|----------------|-----------------------------------------------------------------------------|------|------|------|------|------|------|--------|--------|--------|--------|--------|--------|
| VDAC1          | Voltage-dependent anion-selective channel protein 1                         | 5,47 | 5,43 | 5,46 | 0,91 | 0,98 | 1,08 | 0,3172 | 0,8353 | 0,5695 | 0,3185 | 0,5382 | 0,5081 |
| CNN3           | Calponin-3                                                                  | 4,89 | 4,81 | 4,84 | 0,82 | 0,89 | 1,09 | 0,3180 | 0,5498 | 0,7004 | 0,3185 | 0,4701 | 0,5695 |
| GML;TXNRD1     | Thioredoxin reductase 1, cytoplasmic                                        | 4,55 | 4,62 | 4,49 | 1,18 | 0,89 | 0,75 | 0,4843 | 0,6936 | 0,3184 | 0,3631 | 0,5201 | 0,4294 |
| EEF1B2         | Elongation factor 1-beta                                                    | 4,40 | 4,69 | 4,69 | 1,94 | 1,96 | 1,01 | 0,3190 | 0,3200 | 0,9552 | 0,3185 | 0,4137 | 0,6568 |
| ILF3           | Interleukin enhancer-binding factor 3                                       | 5,24 | 5,20 | 5,16 | 0,92 | 0,83 | 0,90 | 0,5873 | 0,3191 | 0,4356 | 0,3926 | 0,4137 | 0,4621 |
| LARS           | Leucine--tRNA ligase, cytoplasmic                                           | 4,58 | 4,54 | 4,63 | 0,92 | 1,12 | 1,21 | 0,7285 | 0,6932 | 0,3191 | 0,4291 | 0,5201 | 0,4294 |
| RCC1           | Regulator of chromosome condensation                                        | 3,92 | 4,06 | 3,99 | 1,38 | 1,20 | 0,87 | 0,3204 | 0,4872 | 0,6997 | 0,3185 | 0,4608 | 0,5695 |
| CANX           | Calnexin                                                                    | 5,65 | 5,55 | 5,63 | 0,79 | 0,95 | 1,21 | 0,3219 | 0,7892 | 0,4242 | 0,3185 | 0,5305 | 0,4615 |
| NOP56          | Nucleolar protein 56                                                        | 4,43 | 4,34 | 4,45 | 0,82 | 1,06 | 1,29 | 0,3826 | 0,8360 | 0,3223 | 0,3337 | 0,5382 | 0,4314 |
| PRPF8          | Pre-mRNA-processing-splicing factor 8                                       | 4,83 | 4,76 | 4,82 | 0,86 | 0,99 | 1,14 | 0,6549 | 0,9703 | 0,3224 | 0,4060 | 0,5645 | 0,4314 |
| EIF3S3;EIF3H   | Eukaryotic translation initiation factor 3 subunit H                        | 3,92 | 3,95 | 3,97 | 1,07 | 1,13 | 1,06 | 0,5225 | 0,3234 | 0,4418 | 0,3756 | 0,4137 | 0,4665 |
| RBM39          | RNA-binding protein 39                                                      | 3,98 | 4,17 | 4,22 | 1,56 | 1,74 | 1,11 | 0,4489 | 0,3243 | 0,7474 | 0,3562 | 0,4137 | 0,5860 |
| CTSD           | Cathepsin D;Cathepsin D light chain;Cathepsin D heavy chain                 | 5,12 | 4,99 | 5,08 | 0,75 | 0,92 | 1,23 | 0,3248 | 0,3954 | 0,4827 | 0,3185 | 0,4305 | 0,4752 |
| ALDH6A1        | Methylmalonate-semialdehyde dehydrogenase [acylating], mitochondria         | 4,34 | 4,44 | 4,26 | 1,26 | 0,83 | 0,66 | 0,3286 | 0,7021 | 0,4471 | 0,3197 | 0,5201 | 0,4665 |
| STRAP          | Serine-threonine kinase receptor-associated protein                         | 4,57 | 4,64 | 4,65 | 1,19 | 1,21 | 1,02 | 0,3586 | 0,3298 | 0,7699 | 0,3262 | 0,4137 | 0,5945 |
| PYGB           | Glycogen phosphorylase, brain form                                          | 5,15 | 5,16 | 5,08 | 1,03 | 0,86 | 0,83 | 0,8163 | 0,4800 | 0,3304 | 0,4490 | 0,4608 | 0,4345 |
| PRCP           | Lysosomal Pro-X carboxypeptidase                                            | 4,74 | 4,66 | 4,61 | 0,84 | 0,74 | 0,88 | 0,6524 | 0,3306 | 0,7790 | 0,4056 | 0,4137 | 0,5997 |
| TXNL1          | Thioredoxin-like protein 1                                                  | 4,16 | 4,21 | 4,09 | 1,12 | 0,85 | 0,76 | 0,6117 | 0,4710 | 0,3308 | 0,3960 | 0,4555 | 0,4345 |
| RUVBL2         | RuvB-like 2                                                                 | 4,72 | 4,76 | 4,78 | 1,09 | 1,14 | 1,05 | 0,6039 | 0,3321 | 0,7866 | 0,3926 | 0,4138 | 0,6027 |
| IDH1           | Isocitrate dehydrogenase [NADP] cytoplasmic                                 | 5,37 | 5,43 | 5,38 | 1,15 | 1,02 | 0,88 | 0,3352 | 0,9655 | 0,7698 | 0,3221 | 0,5641 | 0,5945 |
| HNRNPR         | Heterogeneous nuclear ribonucleoprotein R                                   | 5,40 | 5,39 | 5,34 | 0,98 | 0,87 | 0,89 | 0,8924 | 0,4541 | 0,3352 | 0,4703 | 0,4491 | 0,4350 |
| CLU            | Clusterin;Clusterin beta chain;Clusterin alpha chain;Clusterin              | 5,44 | 5,22 | 5,40 | 0,61 | 0,93 | 1,52 | 0,3365 | 0,8170 | 0,3626 | 0,3221 | 0,5333 | 0,4375 |
| MTHFD1         | C-1-tetrahydrofolate synthase, cytoplasmic;Methylenetetrahydrofolate        | 4,34 | 4,52 | 4,39 | 1,52 | 1,13 | 0,74 | 0,3390 | 0,5617 | 0,4623 | 0,3230 | 0,4712 | 0,4681 |
| USP14          | Ubiquitin carboxyl-terminal hydrolase;Ubiquitin carboxyl-terminal hydro     | 4,58 | 4,51 | 4,60 | 0,85 | 1,05 | 1,24 | 0,4646 | 0,5549 | 0,3416 | 0,3631 | 0,4701 | 0,4358 |
| DYNC1LI2       | Cytoplasmic dynein 1 light intermediate chain 2                             | 4,60 | 4,63 | 4,42 | 1,07 | 0,67 | 0,62 | 0,8305 | 0,3985 | 0,3435 | 0,4533 | 0,4318 | 0,4358 |
| RAP1B;RAP1A    | Ras-related protein Rap-1b;Ras-related protein Rap-1b-like protein;Ras-     | 4,41 | 4,42 | 4,52 | 1,02 | 1,28 | 1,26 | 0,8711 | 0,3511 | 0,3438 | 0,4652 | 0,4156 | 0,4358 |
| HP1BP3         | Heterochromatin protein 1-binding protein 3                                 | 5,02 | 5,08 | 5,03 | 1,14 | 1,02 | 0,89 | 0,4309 | 0,9342 | 0,3450 | 0,3505 | 0,5568 | 0,4358 |
| COP56          | COP9 signalosome complex subunit 6                                          | 4,16 | 4,27 | 4,22 | 1,30 | 1,14 | 0,88 | 0,3450 | 0,5850 | 0,4610 | 0,3239 | 0,4845 | 0,4681 |
| SLC25A4        | ADP/ATP translocase 1                                                       | 4,43 | 4,55 | 4,44 | 1,31 | 1,00 | 0,77 | 0,3495 | 0,9885 | 0,3850 | 0,3239 | 0,5713 | 0,4454 |
| TALDO1         | Transaldolase                                                               | 4,54 | 4,65 | 4,55 | 1,27 | 1,01 | 0,80 | 0,3500 | 0,9534 | 0,4566 | 0,3239 | 0,5609 | 0,4681 |
| EIF2S3;EIF2S3L | Eukaryotic translation initiation factor 2 subunit 3;Putative eukaryotic tr | 4,29 | 4,22 | 4,31 | 0,84 | 1,05 | 1,25 | 0,3757 | 0,7421 | 0,3509 | 0,3328 | 0,5259 | 0,4375 |
| SORBS2         | Sorbin and SH3 domain-containing protein 2                                  | 4,40 | 4,45 | 3,94 | 1,11 | 0,34 | 0,31 | 0,9125 | 0,3512 | 0,3584 | 0,4741 | 0,4156 | 0,4375 |
| IPO5           | Importin-5                                                                  | 5,22 | 5,20 | 5,17 | 0,97 | 0,89 | 0,92 | 0,8137 | 0,4026 | 0,3525 | 0,4483 | 0,4328 | 0,4375 |
| MSN            | Moesin                                                                      | 5,43 | 5,33 | 5,37 | 0,80 | 0,87 | 1,10 | 0,3543 | 0,7465 | 0,8392 | 0,3248 | 0,5268 | 0,6234 |
| SLC3A2         | 4F2 cell-surface antigen heavy chain                                        | 4,80 | 4,64 | 4,65 | 0,69 | 0,71 | 1,02 | 0,3570 | 0,3602 | 0,9406 | 0,3262 | 0,4200 | 0,6561 |
| PSMD2          | 26S proteasome non-ATPase regulatory subunit 2                              | 4,81 | 4,83 | 4,77 | 1,05 | 0,92 | 0,88 | 0,6532 | 0,5487 | 0,3578 | 0,4056 | 0,4701 | 0,4375 |
| KPNA4          | Importin subunit alpha-3                                                    | 4,28 | 4,35 | 4,30 | 1,17 | 1,05 | 0,89 | 0,3814 | 0,8171 | 0,3603 | 0,3337 | 0,5333 | 0,4375 |
| RPLP0;RPLP0P6  | 60S acidic ribosomal protein P0;60S acidic ribosomal protein P0-like        | 4,96 | 4,96 | 5,04 | 1,00 | 1,20 | 1,20 | 0,9804 | 0,3935 | 0,3629 | 0,4917 | 0,4296 | 0,4375 |
| GART           | Trifunctional purine biosynthetic protein adenosine-3;Phosphoribosylam      | 4,41 | 4,44 | 4,47 | 1,06 | 1,13 | 1,07 | 0,6948 | 0,3660 | 0,5017 | 0,4187 | 0,4200 | 0,4794 |
| HSPH1          | Heat shock protein 105 kDa                                                  | 4,71 | 4,68 | 4,62 | 0,93 | 0,81 | 0,87 | 0,7444 | 0,3670 | 0,5139 | 0,4295 | 0,4200 | 0,4817 |
| ATXN10         | Ataxin-10                                                                   | 4,30 | 4,39 | 4,34 | 1,21 | 1,08 | 0,89 | 0,3681 | 0,7211 | 0,4001 | 0,3314 | 0,5213 | 0,4487 |
| RAP1GDS1       | Rap1 GTPase-GDP dissociation stimulator 1                                   | 4,40 | 4,27 | 4,24 | 0,74 | 0,70 | 0,95 | 0,3688 | 0,3866 | 0,8712 | 0,3314 | 0,4238 | 0,6377 |
| PSMD1          | 26S proteasome non-ATPase regulatory subunit 1                              | 4,90 | 4,93 | 4,98 | 1,08 | 1,19 | 1,10 | 0,6008 | 0,3722 | 0,5687 | 0,3926 | 0,4204 | 0,5081 |
| HMG1           | High mobility group protein B1                                              | 4,95 | 5,16 | 5,00 | 1,61 | 1,13 | 0,70 | 0,3724 | 0,7953 | 0,4712 | 0,3328 | 0,5305 | 0,4723 |
| HSP90AA1       | Heat shock protein HSP 90-alpha                                             | 6,09 | 6,14 | 6,08 | 1,12 | 0,97 | 0,87 | 0,3725 | 0,8704 | 0,4144 | 0,3328 | 0,5453 | 0,4564 |
| TBCD           | Tubulin-specific chaperone D                                                | 4,44 | 4,36 | 4,46 | 0,82 | 1,04 | 1,27 | 0,4406 | 0,8944 | 0,3728 | 0,3524 | 0,5472 | 0,4438 |
| IGF2BP3        | Insulin-like growth factor 2 mRNA-binding protein 3                         | 4,72 | 4,62 | 4,83 | 0,81 | 1,31 | 1,62 | 0,5398 | 0,6507 | 0,3739 | 0,3797 | 0,5095 | 0,4438 |
| EIF3A          | Eukaryotic translation initiation factor 3 subunit A                        | 4,47 | 4,34 | 4,42 | 0,74 | 0,89 | 1,20 | 0,4820 | 0,7693 | 0,3755 | 0,3631 | 0,5305 | 0,4438 |
| CBR1           | Carbonyl reductase [NADPH] 1                                                | 4,30 | 4,41 | 4,32 | 1,28 | 1,03 | 0,81 | 0,3764 | 0,9102 | 0,5505 | 0,3328 | 0,5500 | 0,4987 |
| CCT7           | T-complex protein 1 subunit eta                                             | 5,15 | 5,11 | 5,11 | 0,90 | 0,90 | 1,00 | 0,4161 | 0,3774 | 0,9302 | 0,3481 | 0,4222 | 0,6545 |
| EZR            | Ezrin                                                                       | 4,85 | 5,05 | 4,25 | 1,59 | 0,25 | 0,16 | 0,4189 | 0,5069 | 0,3777 | 0,3481 | 0,4675 | 0,4438 |
| TROVE2         | 60 kDa SS-A/Ro ribonucleoprotein                                            | 4,50 | 4,62 | 4,70 | 1,32 | 1,58 | 1,20 | 0,4731 | 0,3798 | 0,6450 | 0,3631 | 0,4223 | 0,5471 |
| IPO9           | Importin-9                                                                  | 4,56 | 4,61 | 4,51 | 1,13 | 0,90 | 0,79 | 0,7093 | 0,7074 | 0,3803 | 0,4240 | 0,5201 | 0,4454 |
| HNRNPL         | Heterogeneous nuclear ribonucleoprotein L                                   | 5,23 | 5,32 | 5,28 | 1,25 | 1,14 | 0,91 | 0,4354 | 0,6547 | 0,3814 | 0,3524 | 0,5104 | 0,4454 |
| FUBP1          | Far upstream element-binding protein 1                                      | 4,72 | 4,83 | 4,63 | 1,30 | 0,82 | 0,63 | 0,6192 | 0,7595 | 0,3827 | 0,3979 | 0,5288 | 0,4454 |
| SSRP1          | FACT complex subunit SSRP1                                                  | 4,49 | 4,53 | 4,41 | 1,10 | 0,83 | 0,76 | 0,8372 | 0,7052 | 0,3848 | 0,4557 | 0,5201 | 0,4454 |
| PTBP1          | Polypyrimidine tract-binding protein 1                                      | 4,98 | 4,98 | 5,07 | 1,00 | 1,23 | 1,22 | 0,9857 | 0,4879 | 0,3862 | 0,4932 | 0,4608 | 0,4454 |

|                    |                                                                          |      |      |      |      |       |       |        |        |        |        |        |        |
|--------------------|--------------------------------------------------------------------------|------|------|------|------|-------|-------|--------|--------|--------|--------|--------|--------|
| RPL7A              | 60S ribosomal protein L7a                                                | 4,90 | 4,89 | 4,96 | 0,96 | 1,14  | 1,19  | 0,8613 | 0,6226 | 0,3947 | 0,4613 | 0,5017 | 0,4479 |
| GRHPR              | Glyoxylate reductase/hydroxypyruvate reductase                           | 4,44 | 4,40 | 4,36 | 0,91 | 0,83  | 0,92  | 0,6693 | 0,4541 | 0,3958 | 0,4104 | 0,4491 | 0,4479 |
| EMD                | Emerin                                                                   | 3,95 | 3,84 | 4,00 | 0,79 | 1,14  | 1,44  | 0,5883 | 0,4939 | 0,3968 | 0,3926 | 0,4608 | 0,4480 |
| ARPC5              | Actin-related protein 2/3 complex subunit 5                              | 3,94 | 3,98 | 3,92 | 1,10 | 0,95  | 0,86  | 0,6264 | 0,7192 | 0,3998 | 0,3982 | 0,5213 | 0,4487 |
| CTSB               | Cathepsin B;Cathepsin B light chain;Cathepsin B heavy chain              | 4,46 | 4,49 | 4,57 | 1,07 | 1,28  | 1,20  | 0,8089 | 0,4005 | 0,6260 | 0,4470 | 0,4318 | 0,5393 |
| PSMB5              | Proteasome subunit beta type-5                                           | 4,03 | 4,24 | 4,07 | 1,62 | 1,11  | 0,68  | 0,4053 | 0,4373 | 0,5101 | 0,3448 | 0,4421 | 0,4794 |
| ECHS1              | Enoyl-CoA hydratase, mitochondrial                                       | 4,62 | 4,63 | 4,72 | 1,04 | 1,27  | 1,23  | 0,6811 | 0,4069 | 0,4594 | 0,4146 | 0,4341 | 0,4681 |
| FARSA              | Phenylalanine--tRNA ligase alpha subunit                                 | 4,19 | 4,20 | 4,14 | 1,02 | 0,90  | 0,88  | 0,8403 | 0,4213 | 0,4085 | 0,4567 | 0,4365 | 0,4542 |
| CAP1               | Adenylyl cyclase-associated protein 1;Adenylyl cyclase-associated protei | 5,05 | 5,02 | 4,88 | 0,93 | 0,67  | 0,72  | 0,4780 | 0,4098 | 0,4915 | 0,3631 | 0,4346 | 0,4752 |
| RALY               | RNA-binding protein Raly                                                 | 4,71 | 4,81 | 4,69 | 1,23 | 0,94  | 0,76  | 0,4945 | 0,7593 | 0,4106 | 0,3669 | 0,5288 | 0,4542 |
| SET;SETSIP         | Protein SET;Protein SETSIP                                               | 4,81 | 4,92 | 4,84 | 1,28 | 1,08  | 0,84  | 0,4108 | 0,8668 | 0,6824 | 0,3463 | 0,5453 | 0,5642 |
| GTF2I              | General transcription factor II-I                                        | 4,39 | 4,35 | 4,41 | 0,91 | 1,04  | 1,15  | 0,6710 | 0,7826 | 0,4125 | 0,4104 | 0,5305 | 0,4553 |
| PPP1CB             | Serine/threonine-protein phosphatase PP1-beta catalytic subunit;Serine   | 4,75 | 4,79 | 4,77 | 1,10 | 1,06  | 0,96  | 0,4151 | 0,4520 | 0,7134 | 0,3481 | 0,4491 | 0,5734 |
| PRKAR2A            | cAMP-dependent protein kinase type II-alpha regulatory subunit           | 4,16 | 4,08 | 4,08 | 0,83 | 0,83  | 1,00  | 0,4402 | 0,4154 | 0,9925 | 0,3524 | 0,4365 | 0,6632 |
| XRCC6              | X-ray repair cross-complementing protein 6                               | 5,50 | 5,58 | 5,56 | 1,19 | 1,13  | 0,95  | 0,4298 | 0,4169 | 0,7603 | 0,3505 | 0,4365 | 0,5945 |
| ARCNI              | Coatomeer subunit delta                                                  | 4,19 | 4,24 | 4,26 | 1,11 | 1,17  | 1,05  | 0,5224 | 0,4194 | 0,6505 | 0,3756 | 0,4365 | 0,5480 |
| RBM14              | RNA-binding protein 14                                                   | 4,18 | 4,15 | 4,10 | 0,92 | 0,82  | 0,89  | 0,6858 | 0,4207 | 0,6502 | 0,4153 | 0,4365 | 0,5480 |
| ADH5               | Alcohol dehydrogenase class-3                                            | 4,69 | 4,77 | 4,69 | 1,21 | 1,01  | 0,84  | 0,4624 | 0,9350 | 0,4227 | 0,3629 | 0,5568 | 0,4615 |
| MYH3               | Myosin-3                                                                 | 2,71 | 2,44 | 3,92 | 0,53 | 16,31 | 30,84 | 0,5374 | 0,5174 | 0,4243 | 0,3795 | 0,4680 | 0,4615 |
| GSR                | Glutathione reductase, mitochondrial                                     | 3,87 | 3,92 | 3,70 | 1,11 | 0,66  | 0,60  | 0,5008 | 0,5136 | 0,4270 | 0,3701 | 0,4680 | 0,4615 |
| CTNNA1             | Catenin alpha-1                                                          | 4,63 | 4,58 | 4,44 | 0,89 | 0,65  | 0,73  | 0,8440 | 0,4883 | 0,4276 | 0,4581 | 0,4608 | 0,4615 |
| TRIM28             | Transcription intermediary factor 1-beta                                 | 5,24 | 5,29 | 5,24 | 1,14 | 1,02  | 0,89  | 0,6312 | 0,9368 | 0,4304 | 0,3993 | 0,5568 | 0,4615 |
| HDAC2              | Histone deacetylase 2                                                    | 4,47 | 4,58 | 4,59 | 1,30 | 1,31  | 1,01  | 0,4594 | 0,4304 | 0,9681 | 0,3614 | 0,4405 | 0,6595 |
| NAP1L1             | Nucleosome assembly protein 1-like 1                                     | 5,00 | 4,98 | 4,91 | 0,95 | 0,81  | 0,85  | 0,7663 | 0,4336 | 0,5438 | 0,4346 | 0,4405 | 0,4983 |
| TUBA1A;TUBA3C;TUBA | Tubulin alpha-1A chain;Tubulin alpha-3C/D chain;Tubulin alpha-3E chain   | 5,83 | 5,91 | 5,79 | 1,20 | 0,93  | 0,77  | 0,8308 | 0,9300 | 0,4338 | 0,4533 | 0,5568 | 0,4621 |
| SNRNP70            | U1 small nuclear ribonucleoprotein 70 kDa                                | 4,54 | 4,66 | 4,57 | 1,34 | 1,07  | 0,80  | 0,4372 | 0,8439 | 0,4352 | 0,3524 | 0,5393 | 0,4621 |
| PSAT1              | Phosphoserine aminotransferase                                           | 5,15 | 5,22 | 5,31 | 1,17 | 1,46  | 1,25  | 0,6783 | 0,4354 | 0,4690 | 0,4135 | 0,4412 | 0,4710 |
| PDCD6IP            | Programmed cell death 6-interacting protein                              | 4,15 | 4,19 | 4,18 | 1,10 | 1,07  | 0,97  | 0,4359 | 0,7941 | 0,9070 | 0,3524 | 0,5305 | 0,6468 |
| ALDH9A1            | 4-trimethylaminobutyraldehyde dehydrogenase                              | 4,59 | 4,62 | 4,69 | 1,07 | 1,26  | 1,18  | 0,7235 | 0,4390 | 0,5621 | 0,4289 | 0,4427 | 0,5056 |
| XRCC5              | X-ray repair cross-complementing protein 5                               | 5,48 | 5,55 | 5,53 | 1,17 | 1,12  | 0,95  | 0,4413 | 0,5333 | 0,6636 | 0,3524 | 0,4701 | 0,5533 |
| CNDP2              | Cytosolic non-specific dipeptidase                                       | 4,80 | 4,84 | 4,54 | 1,09 | 0,55  | 0,50  | 0,6014 | 0,5046 | 0,4473 | 0,3926 | 0,4667 | 0,4665 |
| SMARCA5            | SWI/SNF-related matrix-associated actin-dependent regulator of chrom     | 4,20 | 4,15 | 4,10 | 0,89 | 0,81  | 0,91  | 0,7281 | 0,4499 | 0,7624 | 0,4291 | 0,4491 | 0,5945 |
| TTN                | Titin                                                                    | 3,12 | 3,46 | 3,95 | 2,18 | 6,79  | 3,11  | 0,4520 | 0,5161 | 0,6993 | 0,3578 | 0,4680 | 0,5695 |
| NUMA1              | Nuclear mitotic apparatus protein 1                                      | 4,39 | 4,65 | 4,74 | 1,84 | 2,26  | 1,23  | 0,5829 | 0,4564 | 0,5295 | 0,3926 | 0,4491 | 0,4906 |
| DNM1L              | Dynamin-1-like protein                                                   | 4,57 | 4,53 | 4,45 | 0,91 | 0,77  | 0,84  | 0,8180 | 0,4583 | 0,4907 | 0,4493 | 0,4491 | 0,4752 |
| NCL                | Nucleolin                                                                | 5,41 | 5,33 | 5,38 | 0,83 | 0,94  | 1,13  | 0,4695 | 0,8243 | 0,4600 | 0,3631 | 0,5351 | 0,4681 |
| LLGL1              | Lethal(2) giant larvae protein homolog 1                                 | 4,51 | 4,38 | 4,53 | 0,75 | 1,06  | 1,41  | 0,4654 | 0,8996 | 0,4604 | 0,3631 | 0,5472 | 0,4681 |
| AGRN               | Agrin;Agrin N-terminal 110 kDa subunit;Agrin C-terminal 110 kDa subuni   | 4,05 | 4,03 | 4,08 | 0,96 | 1,08  | 1,12  | 0,8833 | 0,7833 | 0,4661 | 0,4697 | 0,5305 | 0,4699 |
| CAMK1D;CAMK1       | Calcium/calmodulin-dependent protein kinase type 1D;Calcium/calmod       | 3,52 | 3,63 | 3,60 | 1,30 | 1,20  | 0,92  | 0,4664 | 0,7816 | 0,8875 | 0,3631 | 0,5305 | 0,6445 |
| UBA1               | Ubiquitin-like modifier-activating enzyme 1                              | 5,79 | 5,79 | 5,70 | 1,00 | 0,83  | 0,83  | 0,9991 | 0,5423 | 0,4669 | 0,4969 | 0,4701 | 0,4699 |
| DHX9               | ATP-dependent RNA helicase A                                             | 5,59 | 5,55 | 5,54 | 0,91 | 0,89  | 0,98  | 0,5355 | 0,4670 | 0,8131 | 0,3789 | 0,4546 | 0,6144 |
| RPL22              | 60S ribosomal protein L22                                                | 4,21 | 4,32 | 4,33 | 1,28 | 1,32  | 1,03  | 0,4756 | 0,4889 | 0,9068 | 0,3631 | 0,4608 | 0,6468 |
| KPNB1              | Importin subunit beta-1                                                  | 5,41 | 5,44 | 5,44 | 1,08 | 1,08  | 1,00  | 0,5124 | 0,4768 | 0,9681 | 0,3726 | 0,4594 | 0,6595 |
| NAP1L4             | Nucleosome assembly protein 1-like 4                                     | 4,87 | 4,90 | 4,86 | 1,06 | 0,97  | 0,92  | 0,6405 | 0,6804 | 0,4769 | 0,4025 | 0,5174 | 0,4746 |
| PA2G4              | Proliferation-associated protein 2G4                                     | 4,59 | 4,66 | 4,61 | 1,18 | 1,05  | 0,89  | 0,4772 | 0,7104 | 0,6041 | 0,3631 | 0,5206 | 0,5280 |
| BZW2               | Basic leucine zipper and W2 domain-containing protein 2                  | 4,11 | 4,16 | 4,16 | 1,14 | 1,13  | 1,00  | 0,4841 | 0,5182 | 0,9879 | 0,3631 | 0,4680 | 0,6619 |
| HSP90AB2P          | Putative heat shock protein HSP 90-beta 2                                | 4,59 | 4,67 | 4,69 | 1,20 | 1,24  | 1,04  | 0,5027 | 0,4841 | 0,8098 | 0,3703 | 0,4608 | 0,6138 |
| TARDBP             | TAR DNA-binding protein 43                                               | 4,35 | 4,33 | 4,34 | 0,95 | 0,98  | 1,04  | 0,4864 | 0,8463 | 0,7665 | 0,3631 | 0,5393 | 0,5945 |
| ACTR3              | Actin-related protein 3                                                  | 5,04 | 5,05 | 5,03 | 1,02 | 0,96  | 0,94  | 0,8032 | 0,7152 | 0,4868 | 0,4458 | 0,5213 | 0,4752 |
| HNRNPUL2;HNRNPUL2  | Heterogeneous nuclear ribonucleoprotein U-like protein 2                 | 4,54 | 4,57 | 4,59 | 1,09 | 1,14  | 1,04  | 0,6614 | 0,4897 | 0,6981 | 0,4084 | 0,4608 | 0,5695 |
| OAT                | Ornithine aminotransferase, mitochondrial;Ornithine aminotransferase,    | 4,21 | 4,16 | 4,07 | 0,88 | 0,72  | 0,82  | 0,6948 | 0,4931 | 0,5578 | 0,4187 | 0,4608 | 0,5026 |
| OSBP1L8            | Oxysterol-binding protein-related protein 8;Oxysterol-binding protein    | 3,75 | 3,69 | 3,71 | 0,87 | 0,91  | 1,05  | 0,4936 | 0,6502 | 0,8158 | 0,3669 | 0,5095 | 0,6150 |
| SNRNP200           | U5 small nuclear ribonucleoprotein 200 kDa helicase                      | 4,82 | 4,73 | 4,79 | 0,81 | 0,93  | 1,16  | 0,5670 | 0,8599 | 0,4946 | 0,3862 | 0,5438 | 0,4772 |
| RBBP4              | Histone-binding protein RBBP4                                            | 4,69 | 4,77 | 4,74 | 1,21 | 1,13  | 0,93  | 0,5038 | 0,7040 | 0,8323 | 0,3703 | 0,5201 | 0,6203 |
| EEF1G              | Elongation factor 1-gamma                                                | 5,29 | 5,29 | 5,31 | 0,99 | 1,04  | 1,05  | 0,8925 | 0,5757 | 0,5041 | 0,4703 | 0,4800 | 0,4794 |
| PGD                | 6-phosphogluconate dehydrogenase, decarboxylating                        | 5,59 | 5,58 | 5,57 | 0,98 | 0,94  | 0,96  | 0,7980 | 0,5856 | 0,5051 | 0,4446 | 0,4845 | 0,4794 |
| EIF3L              | Eukaryotic translation initiation factor 3 subunit L                     | 4,30 | 4,35 | 4,33 | 1,13 | 1,09  | 0,96  | 0,5059 | 0,6606 | 0,8002 | 0,3708 | 0,5107 | 0,6098 |

|              |                                                                           |      |      |      |      |      |      |        |        |        |        |        |        |
|--------------|---------------------------------------------------------------------------|------|------|------|------|------|------|--------|--------|--------|--------|--------|--------|
| PSPC1        | Paraspeckle component 1                                                   | 4,44 | 4,39 | 4,37 | 0,90 | 0,85 | 0,94 | 0,7878 | 0,5078 | 0,8960 | 0,4406 | 0,4675 | 0,6445 |
| PRMT1        | Protein arginine N-methyltransferase 1                                    | 4,55 | 4,50 | 4,56 | 0,90 | 1,02 | 1,13 | 0,5288 | 0,8851 | 0,5086 | 0,3778 | 0,5472 | 0,4794 |
| KHSRP        | Far upstream element-binding protein 2                                    | 4,87 | 4,92 | 4,89 | 1,13 | 1,04 | 0,92 | 0,6209 | 0,8543 | 0,5105 | 0,3979 | 0,5417 | 0,4794 |
| CRABP1       | Cellular retinoic acid-binding protein 1                                  | 4,68 | 4,54 | 4,46 | 0,71 | 0,59 | 0,83 | 0,6330 | 0,5215 | 0,7059 | 0,3993 | 0,4684 | 0,5714 |
| FHL1         | Four and a half LIM domains protein 1                                     | 4,10 | 4,13 | 4,22 | 1,09 | 1,34 | 1,23 | 0,7584 | 0,5219 | 0,6156 | 0,4335 | 0,4684 | 0,5340 |
| RPSA;RPSAP58 | 40S ribosomal protein SA                                                  | 5,12 | 5,06 | 5,10 | 0,87 | 0,95 | 1,09 | 0,5227 | 0,8294 | 0,7467 | 0,3756 | 0,5361 | 0,5860 |
| NASP         | Nuclear autoantigenic sperm protein                                       | 4,32 | 4,27 | 4,47 | 0,88 | 1,43 | 1,61 | 0,8880 | 0,5301 | 0,5728 | 0,4703 | 0,4701 | 0,5094 |
| IDH2         | Isocitrate dehydrogenase [NADP], mitochondrial                            | 5,55 | 5,55 | 5,59 | 1,00 | 1,09 | 1,09 | 0,9803 | 0,5350 | 0,5304 | 0,4917 | 0,4701 | 0,4906 |
| PRPF19       | Pre-mRNA-processing factor 19                                             | 4,73 | 4,74 | 4,76 | 1,04 | 1,10 | 1,05 | 0,7393 | 0,5341 | 0,7026 | 0,4293 | 0,4701 | 0,5703 |
| SUPT16H      | FACT complex subunit SPT16                                                | 4,44 | 4,23 | 4,35 | 0,61 | 0,80 | 1,30 | 0,5342 | 0,7951 | 0,5910 | 0,3789 | 0,5305 | 0,5210 |
| NPEPPS       | Puromycin-sensitive aminopeptidase                                        | 5,29 | 5,31 | 5,28 | 1,06 | 0,98 | 0,92 | 0,7864 | 0,8966 | 0,5428 | 0,4406 | 0,5472 | 0,4983 |
| SDHA         | Succinate dehydrogenase [ubiquinone] flavoprotein subunit, mitochondri    | 4,27 | 4,30 | 4,30 | 1,09 | 1,09 | 1,00 | 0,6400 | 0,5464 | 0,9902 | 0,4025 | 0,4701 | 0,6626 |
| LMNB2        | Lamin-B2                                                                  | 4,92 | 4,94 | 4,95 | 1,05 | 1,07 | 1,02 | 0,5472 | 0,5927 | 0,8670 | 0,3806 | 0,4894 | 0,6365 |
| CCT8         | T-complex protein 1 subunit theta                                         | 5,40 | 5,43 | 5,41 | 1,06 | 1,02 | 0,96 | 0,6033 | 0,8614 | 0,5497 | 0,3926 | 0,5438 | 0,4987 |
| RPS6         | 40S ribosomal protein S6                                                  | 4,59 | 4,62 | 4,67 | 1,08 | 1,21 | 1,12 | 0,7332 | 0,5508 | 0,6682 | 0,4291 | 0,4701 | 0,5558 |
| KIF5C        | Kinesin heavy chain isoform 5C                                            | 5,08 | 5,01 | 4,98 | 0,86 | 0,80 | 0,92 | 0,5510 | 0,6598 | 0,8868 | 0,3821 | 0,5107 | 0,6445 |
| PSMD13       | 26S proteasome non-ATPase regulatory subunit 13                           | 4,72 | 4,64 | 4,73 | 0,82 | 1,03 | 1,25 | 0,6028 | 0,8984 | 0,5513 | 0,3926 | 0,5472 | 0,4987 |
| HUWE1        | E3 ubiquitin-protein ligase HUWE1                                         | 4,25 | 4,18 | 4,15 | 0,85 | 0,79 | 0,93 | 0,6944 | 0,5826 | 0,5524 | 0,4187 | 0,4839 | 0,4987 |
| EIF5         | Eukaryotic translation initiation factor 5                                | 4,15 | 4,09 | 4,10 | 0,88 | 0,89 | 1,01 | 0,6454 | 0,5541 | 0,9786 | 0,4050 | 0,4701 | 0,6619 |
| EIF4A2       | Eukaryotic initiation factor 4A-II                                        | 4,68 | 4,65 | 4,63 | 0,92 | 0,89 | 0,97 | 0,6642 | 0,5597 | 0,7420 | 0,4084 | 0,4712 | 0,5860 |
| VARS         | Valine--tRNA ligase                                                       | 4,47 | 4,42 | 4,46 | 0,90 | 0,98 | 1,10 | 0,6043 | 0,9298 | 0,5700 | 0,3926 | 0,5568 | 0,5081 |
| TPP1         | Tripeptidyl-peptidase 1                                                   | 4,74 | 4,65 | 4,67 | 0,82 | 0,86 | 1,04 | 0,5719 | 0,7348 | 0,9393 | 0,3889 | 0,5249 | 0,6561 |
| PSMD6        | 26S proteasome non-ATPase regulatory subunit 6                            | 4,54 | 4,55 | 4,50 | 1,01 | 0,91 | 0,90 | 0,9709 | 0,5748 | 0,6461 | 0,4912 | 0,4800 | 0,5471 |
| PSMC4        | 26S protease regulatory subunit 6B                                        | 4,63 | 4,62 | 4,54 | 0,98 | 0,80 | 0,82 | 0,9476 | 0,6278 | 0,5919 | 0,4834 | 0,5017 | 0,5210 |
| PSMD3        | 26S proteasome non-ATPase regulatory subunit 3                            | 4,84 | 4,82 | 4,80 | 0,96 | 0,91 | 0,95 | 0,5949 | 0,6694 | 0,8129 | 0,3926 | 0,5137 | 0,6144 |
| SHMT2        | Serine hydroxymethyltransferase, mitochondrial;Serine hydroxymethyltr     | 4,76 | 4,70 | 4,80 | 0,87 | 1,10 | 1,27 | 0,6015 | 0,8389 | 0,6165 | 0,3926 | 0,5383 | 0,5340 |
| AP1G1        | AP-1 complex subunit gamma-1                                              | 4,35 | 4,40 | 4,34 | 1,13 | 0,96 | 0,85 | 0,7379 | 0,9247 | 0,6037 | 0,4291 | 0,5568 | 0,5280 |
| NACA         | Nascent polypeptide-associated complex subunit alpha;Nascent polypep      | 4,77 | 4,84 | 4,84 | 1,18 | 1,17 | 0,99 | 0,6098 | 0,6122 | 0,9494 | 0,3955 | 0,4995 | 0,6568 |
| GLUD1;GLUD2  | Glutamate dehydrogenase 1, mitochondrial;Glutamate dehydrogenase 2        | 5,15 | 5,10 | 5,08 | 0,89 | 0,85 | 0,96 | 0,6246 | 0,6149 | 0,9113 | 0,3982 | 0,4995 | 0,6468 |
| PARP1        | Poly [ADP-ribose] polymerase 1                                            | 5,26 | 5,30 | 5,29 | 1,11 | 1,07 | 0,97 | 0,6178 | 0,7959 | 0,8948 | 0,3979 | 0,5305 | 0,6445 |
| FKBP4        | Peptidyl-prolyl cis-trans isomerase FKBP4;Peptidyl-prolyl cis-trans isome | 4,54 | 4,55 | 4,45 | 1,03 | 0,82 | 0,80 | 0,9126 | 0,6493 | 0,6275 | 0,4741 | 0,5095 | 0,5397 |
| SF3A2        | Splicing factor 3A subunit 2                                              | 3,98 | 4,02 | 4,01 | 1,09 | 1,09 | 0,99 | 0,7064 | 0,6282 | 0,9657 | 0,4240 | 0,5017 | 0,6595 |
| TECR         | Very-long-chain enoyl-CoA reductase                                       | 4,04 | 4,11 | 4,12 | 1,16 | 1,21 | 1,04 | 0,7324 | 0,6394 | 0,8782 | 0,4291 | 0,5062 | 0,6418 |
| PSMD12       | 26S proteasome non-ATPase regulatory subunit 12                           | 4,72 | 4,74 | 4,74 | 1,03 | 1,03 | 1,00 | 0,6483 | 0,6737 | 0,9734 | 0,4054 | 0,5151 | 0,6612 |
| CCAR2        | Cell cycle and apoptosis regulator protein 2                              | 4,31 | 4,29 | 4,25 | 0,97 | 0,87 | 0,90 | 0,9137 | 0,6935 | 0,6548 | 0,4741 | 0,5201 | 0,5488 |
| HMOX2        | Heme oxygenase 2                                                          | 3,83 | 3,83 | 3,78 | 1,02 | 0,89 | 0,88 | 0,9273 | 0,6562 | 0,6688 | 0,4778 | 0,5104 | 0,5558 |
| GGH          | Gamma-glutamyl hydrolase                                                  | 4,79 | 4,74 | 4,72 | 0,90 | 0,86 | 0,96 | 0,7825 | 0,6873 | 0,9014 | 0,4403 | 0,5201 | 0,6463 |
| DDX1         | ATP-dependent RNA helicase DDX1                                           | 4,91 | 4,92 | 4,90 | 1,03 | 0,98 | 0,95 | 0,8221 | 0,9028 | 0,6906 | 0,4507 | 0,5472 | 0,5681 |
| NARS         | Asparagine--tRNA ligase, cytoplasmic                                      | 4,70 | 4,73 | 4,75 | 1,07 | 1,12 | 1,04 | 0,8231 | 0,6937 | 0,8654 | 0,4507 | 0,5201 | 0,6363 |
| VDAC2        | Voltage-dependent anion-selective channel protein 2                       | 5,38 | 5,39 | 5,35 | 1,01 | 0,93 | 0,92 | 0,8962 | 0,7488 | 0,6939 | 0,4703 | 0,5268 | 0,5690 |
| PSMD7        | 26S proteasome non-ATPase regulatory subunit 7                            | 4,39 | 4,37 | 4,37 | 0,93 | 0,94 | 1,00 | 0,7008 | 0,7169 | 0,9874 | 0,4217 | 0,5213 | 0,6619 |
| CSE1L        | Exportin-2                                                                | 5,58 | 5,56 | 5,53 | 0,94 | 0,89 | 0,95 | 0,7852 | 0,7054 | 0,8164 | 0,4406 | 0,5201 | 0,6150 |
| SYNCRIP      | Heterogeneous nuclear ribonucleoprotein Q                                 | 5,19 | 5,18 | 5,18 | 0,99 | 0,98 | 0,99 | 0,8893 | 0,7085 | 0,8227 | 0,4703 | 0,5201 | 0,6187 |
| TPT1         | Translationally-controlled tumor protein;TPT1-like protein                | 4,43 | 4,45 | 4,47 | 1,05 | 1,08 | 1,03 | 0,7309 | 0,7149 | 0,8837 | 0,4291 | 0,5213 | 0,6445 |
| RTCB         | tRNA-splicing ligase RtcB homolog                                         | 4,92 | 4,94 | 4,94 | 1,06 | 1,04 | 0,98 | 0,7155 | 0,7495 | 0,8994 | 0,4256 | 0,5268 | 0,6458 |
| HNRNPM       | Heterogeneous nuclear ribonucleoprotein M                                 | 5,55 | 5,58 | 5,58 | 1,07 | 1,07 | 1,00 | 0,7295 | 0,7549 | 0,9562 | 0,4291 | 0,5288 | 0,6568 |
| DEK          | Protein DEK                                                               | 4,37 | 4,36 | 4,33 | 0,98 | 0,92 | 0,93 | 0,9511 | 0,7314 | 0,7922 | 0,4843 | 0,5245 | 0,6052 |
| VDAC3        | Voltage-dependent anion-selective channel protein 3                       | 4,89 | 4,86 | 4,89 | 0,92 | 1,00 | 1,08 | 0,7359 | 0,9854 | 0,7684 | 0,4291 | 0,5712 | 0,5945 |
| BLMH         | Bleomycin hydrolase                                                       | 4,29 | 4,31 | 4,31 | 1,05 | 1,04 | 1,00 | 0,7367 | 0,7622 | 0,9781 | 0,4291 | 0,5288 | 0,6619 |
| CSDE1        | Cold shock domain-containing protein E1                                   | 3,95 | 3,94 | 3,96 | 0,97 | 1,01 | 1,05 | 0,7642 | 0,9498 | 0,8250 | 0,4346 | 0,5609 | 0,6188 |
| SLC25A6      | ADP/ATP translocase 3;ADP/ATP translocase 3, N-terminally processed       | 4,65 | 4,65 | 4,67 | 0,99 | 1,06 | 1,07 | 0,9781 | 0,8465 | 0,7661 | 0,4917 | 0,5393 | 0,5945 |
| ARL6IP5      | PRA1 family protein 3                                                     | 4,64 | 4,61 | 4,65 | 0,94 | 1,02 | 1,08 | 0,7985 | 0,9396 | 0,7668 | 0,4446 | 0,5574 | 0,5945 |
| YARS         | Tyrosine--tRNA ligase, cytoplasmic;Tyrosine--tRNA ligase, cytoplasmic, N  | 4,34 | 4,36 | 4,35 | 1,05 | 1,02 | 0,97 | 0,7715 | 0,9687 | 0,9254 | 0,4368 | 0,5645 | 0,6542 |
| SLC25A3      | Phosphate carrier protein, mitochondrial                                  | 4,89 | 4,90 | 4,87 | 1,00 | 0,95 | 0,95 | 0,9777 | 0,7799 | 0,7807 | 0,4917 | 0,5305 | 0,6001 |
| PRMT5        | Protein arginine N-methyltransferase 5;Protein arginine N-methyltransfe   | 3,90 | 3,92 | 3,93 | 1,03 | 1,06 | 1,03 | 0,8659 | 0,7855 | 0,8700 | 0,4631 | 0,5305 | 0,6377 |
| HNRNPU       | Heterogeneous nuclear ribonucleoprotein U                                 | 5,45 | 5,46 | 5,47 | 1,02 | 1,04 | 1,02 | 0,9102 | 0,8234 | 0,8096 | 0,4741 | 0,5351 | 0,6138 |
| HSDL2        | Hydroxysteroid dehydrogenase-like protein 2                               | 4,21 | 4,21 | 4,18 | 0,99 | 0,93 | 0,93 | 0,9888 | 0,8400 | 0,8297 | 0,4941 | 0,5383 | 0,6193 |

|        |                                                           |      |      |      |      |      |      |        |        |        |        |        |        |
|--------|-----------------------------------------------------------|------|------|------|------|------|------|--------|--------|--------|--------|--------|--------|
| QARS   | Glutamine--tRNA ligase                                    | 4,43 | 4,45 | 4,42 | 1,04 | 0,96 | 0,92 | 0,9056 | 0,8886 | 0,8493 | 0,4741 | 0,5472 | 0,6263 |
| MITCH2 | Mitochondrial carrier homolog 2                           | 4,51 | 4,49 | 4,50 | 0,96 | 0,98 | 1,02 | 0,8544 | 0,9301 | 0,9511 | 0,4593 | 0,5568 | 0,6568 |
| CPSF6  | Cleavage and polyadenylation specificity factor subunit 6 | 4,28 | 4,30 | 4,30 | 1,04 | 1,05 | 1,01 | 0,8949 | 0,8602 | 0,9552 | 0,4703 | 0,5438 | 0,6568 |
| BCLAF1 | Bcl-2-associated transcription factor 1                   | 4,11 | 4,09 | 4,08 | 0,96 | 0,93 | 0,97 | 0,9078 | 0,8849 | 0,9357 | 0,4741 | 0,5472 | 0,6561 |
| UGP2   | UTP--glucose-1-phosphate uridylyltransferase              | 4,46 | 4,45 | 4,46 | 0,98 | 1,00 | 1,02 | 0,9275 | 0,9977 | 0,8892 | 0,4778 | 0,5744 | 0,6445 |
| KARS   | Lysine--tRNA ligase                                       | 4,47 | 4,47 | 4,48 | 1,00 | 1,01 | 1,01 | 0,9999 | 0,9333 | 0,9417 | 0,4969 | 0,5568 | 0,6561 |
